# Supplementary material for: Enantioselective sulfonylation using sodium hydrogen sulfite, 4-substituted Hantzsch esters and 1-(arylethynyl)naphthalen-2-ols
Source: Royal Society of Chemistry journal article supplement (doi:10.1039/d2qo01654k), 2022-11-11

## Supporting Information

# Enantioselective sulfonylation from sodium hydrogen sulfite, 4-substituted Hantzsch esters and 1- (arylethynyl)naphthalen-2-ols

Xinhua Wang,<sup>a</sup> Qiuping Ding,<sup>a</sup> Chenxi Yang,<sup>b</sup> Jianguo Yang<sup>\*b</sup> and Jie Wu<sup>\*b,c,d</sup>

---

<sup>a</sup> College of Chemistry & Chemical Engineering, Jiangxi Normal University, Nanchang, 330022, China.

<sup>b</sup> School of Pharmaceutical and Chemical Engineering & Institute for Advanced Studies, Taizhou University, Taizhou 318000, China.

<sup>c</sup> State Key Laboratory of Organometallic Chemistry, Shanghai Institute of Organic Chemistry, Chinese Academy of Sciences, Shanghai 200032, China.

<sup>d</sup> School of Chemistry and Chemical Engineering, Henan Normal University, Xinxiang 453007, China.

Corresponding author: jie\_wu@fudan.edu.cn

## Contents

|                                                                                                                                   |           |
|-----------------------------------------------------------------------------------------------------------------------------------|-----------|
| <b><u>1.</u> General information .....</b>                                                                                        | <b>2</b>  |
| <b><u>2.</u> General procedure procedure for the preparation of (S,E)-1-(1-(alkylsulfonyl)-2-arylvinyl)naphthalen-2-ols .....</b> | <b>2</b>  |
| <b><u>3.</u> Substrate scopes with limitations .....</b>                                                                          | <b>3</b>  |
| <b><u>4.</u> Characterization of all products.....</b>                                                                            | <b>4</b>  |
| <b><u>5.</u> References.....</b>                                                                                                  | <b>21</b> |
| <b><u>6.</u> NMR spectra of compounds .....</b>                                                                                   | <b>21</b> |

## 1. General information

All glassware was thoroughly oven-dried. Chemicals and solvents were either purchased from commercial suppliers or purified by standard techniques. Thin-layer chromatography plates were visualized by exposure to ultraviolet light and/or staining with phosphomolybdic acid followed by heating on a hot plate. Flash chromatography was carried out using silica gel (200–300 mesh).  $^1\text{H}$  NMR and  $^{13}\text{C}$  NMR spectra were recorded on a Bruker AM-400 (400 MHz). The spectra were recorded in deuteriochloroform ( $\text{CDCl}_3$  or  $\text{CD}_3\text{CN}$ ) as solvent at room temperature,  $^1\text{H}$  and  $^{13}\text{C}$  NMR chemical shifts are reported in ppm relative to the residual solvent peak. The residual solvent signals were used as references and the chemical shifts were converted to the TMS scale. Data for  $^1\text{H}$  NMR are reported as follows: chemical shift ( $\delta$  ppm), multiplicity (s = singlet, d = doublet, t = triplet, m = multiplet, dd = doublet, br = broad), integration, coupling constant (Hz) and assignment. Data for  $^{13}\text{C}$  NMR are reported as chemical shift. Enantioselectivities were recorded on Shimadzu HPLC using CHIRALCEL and CHIRALPAK columns. Electrospray-ionisation HRMS data were acquired on a Q-TOF mass spectrometer (Waters SYNAPT G2-Si) LC-MS TOF.

## 2. General procedure procedure for the preparation of (*S,E*)-1-(1-(alkylsulfonyl)-2-arylvinyl)naphthalen-2-ols

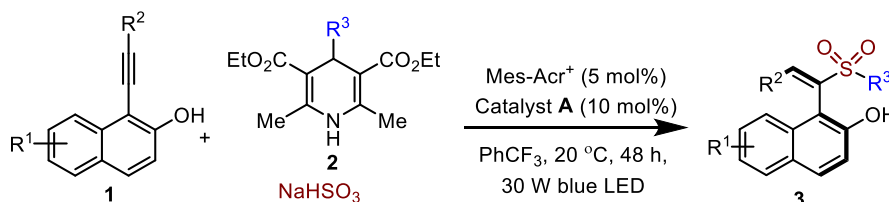

All optimization reactions were set up in a glove box under N<sub>2</sub> atmosphere. Substrate **1** (0.2 mmol, 1.0 equiv), 4-substituted Hantzsch esters **2** (0.4 mmol, 2 equiv), NaHSO<sub>3</sub> (0.4 mmol, 2.0 equiv), Catalyst **A** (10 mol%) were added to a solution of photocatalyst Mes-Acr<sup>+</sup> (5 mol%) in dry PhCF<sub>3</sub> (2 mL) at room temperature. The

heterogenous mixture was placed in the irradiation apparatus equipped with blue LEDs. The resulting mixture was stirred at 20 °C for 48 h. Upon completion of the reaction, the resulting crude residue was concentrated in vacuum and purified by column chromatography with gradient eluents to afford the desired product **3**.

### 3. Substrate scopes with limitations

4-substituted Hantzsch esters **2** was employed in the reaction with 1-alkynynaphthalen-2-ol **1** and NaHSO<sub>3</sub> under the standard reaction conditions.

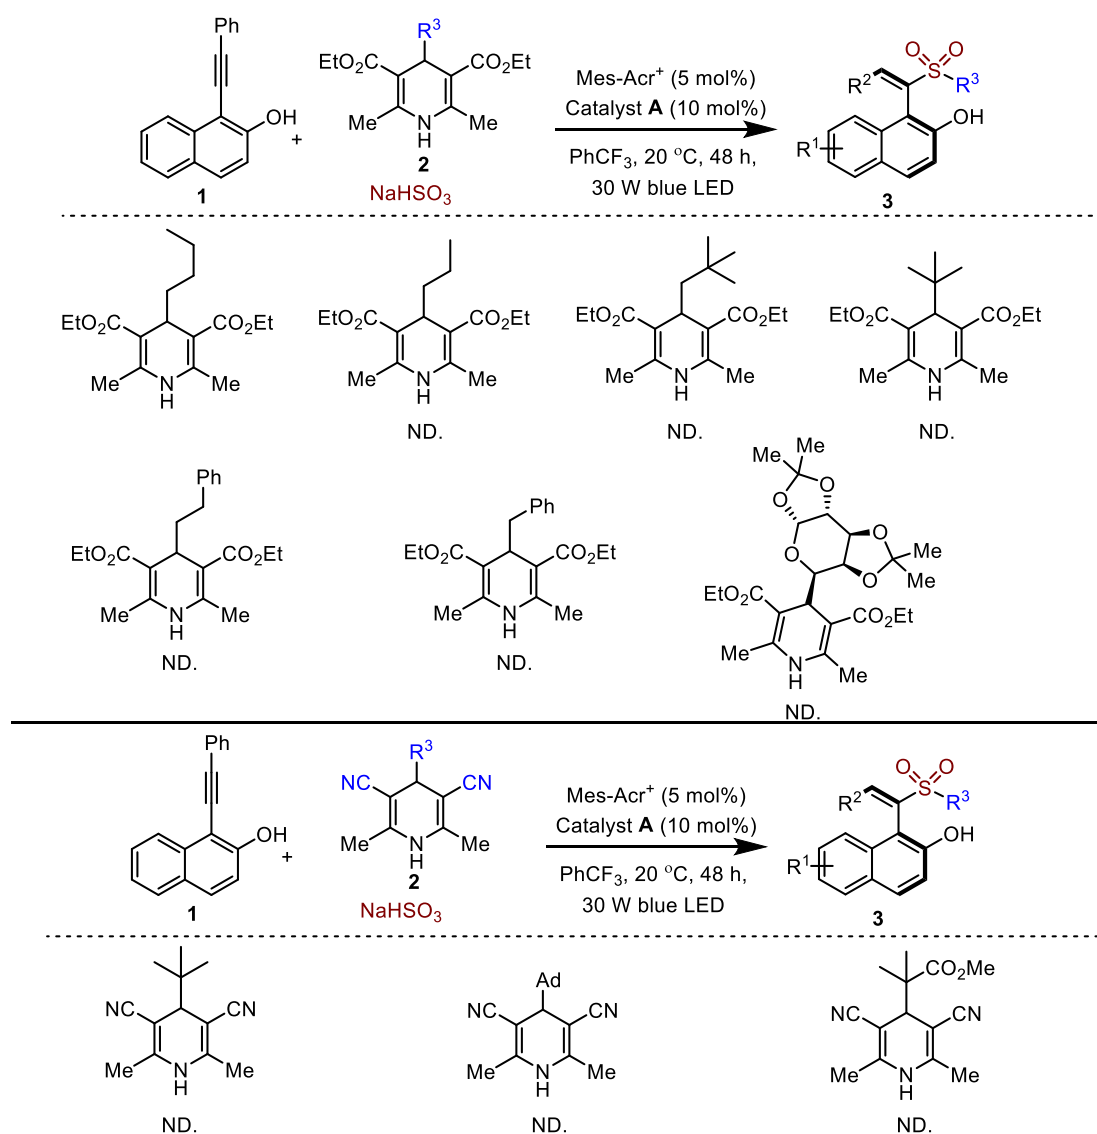

## 4. Characterization of all products

### (E)-1-(1-(cyclohexylsulfonyl)-2-phenylvinyl)naphthalen-2-ol (3a)

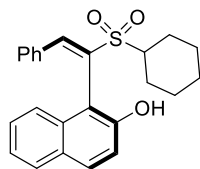

Purification by flash chromatography (petroleum ether/acetone = 4/1).

White solid; 80% yield;  $[\alpha]_D^{20} = +147.8$  ( $c = 0.12$  in  $\text{CHCl}_3$ );  $^1\text{H NMR}$

(400 MHz,  $\text{CDCl}_3$ )  $\delta$  (ppm) 8.11 (s, 1H), 7.99 (s, 1H), 7.90 (d,  $J =$

9.2 Hz, 1H), 7.82–7.80 (m, 1H), 7.57–7.55 (m, 1H), 7.34–7.30 (m, 3H), 7.16 (t,  $J = 7.2$

Hz, 1H), 7.04 (t,  $J = 7.6$  Hz, 2H), 6.98 (d,  $J = 7.6$  Hz, 2H), 2.74 (t,  $J = 12.0$  Hz, 1H),

2.22 (d,  $J = 12.4$  Hz, 1H), 2.07 (d,  $J = 12.4$  Hz, 1H), 1.79 (t,  $J = 12.0$  Hz, 2H), 1.66–

1.48 (m, 3H), 1.16 (dd,  $J = 25.6, 12.8$  Hz, 1H), 1.04–0.91 (m, 2H);  $^{13}\text{C NMR}$  (100

MHz,  $\text{CDCl}_3$ )  $\delta$  (ppm) 154.3, 144.5, 132.4, 132.3, 132.0, 131.9, 130.7, 130.4, 129.5,

128.8, 128.6, 127.5, 124.0, 122.8, 120.4, 111.3, 58.3, 26.6, 25.1, 25.1, 24.8, 24.2;

**HPLC analysis:** CHIRALPAK AD-H (hexane/*i*-PrOH = 70/30, 1.0 mL/min,  $\lambda = 254$

nm,  $t_R = 5.032$  min (minor),  $t_R = 6.035$  min (major).<sup>[1]</sup>

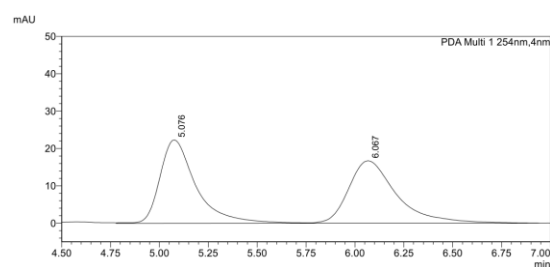

| Peak# | Ret. Time | Area   | Height | Aera%  |
|-------|-----------|--------|--------|--------|
| 1     | 5.076     | 286913 | 22358  | 50.109 |
| 2     | 6.067     | 285662 | 16728  | 49.891 |

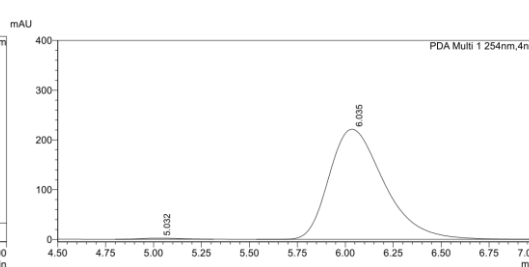

| Peak# | Ret. Time | Area    | Height | Aera%  |
|-------|-----------|---------|--------|--------|
| 1     | 5.032     | 30817   | 2001   | 0.692  |
| 2     | 6.035     | 4424090 | 221448 | 99.308 |

### (E)-1-(1-(pentan-3-ylsulfonyl)-2-phenylvinyl)naphthalen-2-ol (3b)

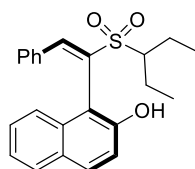

Purification by flash chromatography (petroleum ether/acetone = 4/1).

White solid; 61% yield;  $[\alpha]_D^{20} = +157.1$  ( $c = 0.10$  in  $\text{CHCl}_3$ );  $^1\text{H NMR}$

(400 MHz,  $\text{CDCl}_3$ )  $\delta$  (ppm) 8.14 (m, 2H), 7.90 (d,  $J = 8.8$  Hz, 1H),

7.83–7.80 (m, 1H), 7.54–7.51 (m, 1H), 7.35 (d,  $J = 9.2$  Hz, 1H), 7.33–7.29 (m, 2H),

7.16 (t,  $J = 7.6$  Hz, 1H), 7.04 (t,  $J = 7.6$  Hz, 2H), 6.98 (d,  $J = 7.6$  Hz, 2H), 2.67–2.61

(m, 1H), 2.02–1.92 (m, 1H), 1.86–1.78 (m, 3H), 0.95 (t,  $J = 7.2$  Hz, 3H), 0.80 (t,  $J =$

7.6 Hz, 3H);  $^{13}\text{C NMR}$  (100 MHz,  $\text{CDCl}_3$ )  $\delta$  (ppm) 154.5, 144.0, 132.5, 132.4, 132.3,

131.6, 130.7, 130.4, 129.5, 128.9, 128.6, 127.6, 124.0, 122.6, 120.7, 111.2, 60.5, 20.7, 18.4, 10.8, 10.6; HRMS (ESI) for  $C_{23}H_{24}NaO_3S^+$  calcd. 403.1338, found: 403.1344; **HPLC analysis:** CHIRALPAK AD-H (hexane/*i*-PrOH = 70/30, 1.0 mL/min,  $\lambda$  = 254 nm,  $t_R$  = 4.725 min (minor),  $t_R$  = 6.048 min (major).

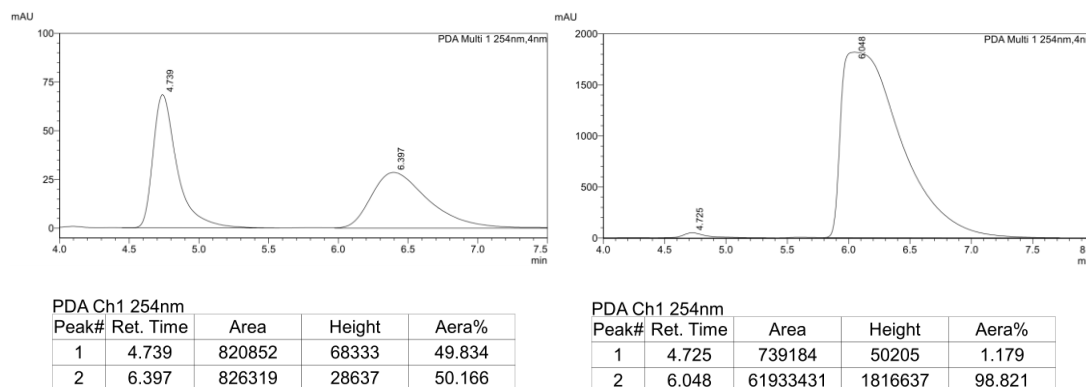

**(E)-1-(1-(isopropylsulfonyl)-2-phenylvinyl)naphthalen-2-ol (3c)**

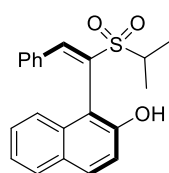

Purification by flash chromatography (petroleum ether/acetone = 4/1).

White solid; 70% yield;  $[\alpha]_D^{20} = +221.5$  ( $c = 0.10$  in  $CHCl_3$ );  $^1H$  NMR

(400 MHz,  $CDCl_3$ )  $\delta$  (ppm) 8.15 (s, 1H), 8.07 (s, 1H), 7.89 (d,  $J = 9.2$

Hz, 1H), 7.82–7.79 (m, 1H), 7.58–7.56 (m, 1H), 7.34–7.29 (m, 3H), 7.17 (t,  $J = 7.2$  Hz,

1H), 7.05 (t,  $J = 8.0$  Hz, 2H), 6.99 (d,  $J = 7.6$  Hz, 2H), 3.09–2.99 (m, 1H), 1.36 (d,  $J =$

6.4 Hz, 3H), 1.29 (d,  $J = 6.8$  Hz, 3H);  $^{13}C$  NMR (100 MHz,  $CDCl_3$ )  $\delta$  (ppm) 154.4,

144.3, 132.4, 132.3, 131.9, 131.6, 130.8, 130.5, 129.5, 128.9, 128.7, 127.5, 124.0, 123.0,

120.5, 111.1, 50.4, 16.7, 14.4; **HPLC analysis:** CHIRALPAK AD-H (hexane/*i*-PrOH

= 70/30, 1.0 mL/min,  $\lambda$  = 254 nm,  $t_R$  = 4.539 min (minor),  $t_R$  = 5.221 min (major).<sup>[1]</sup>

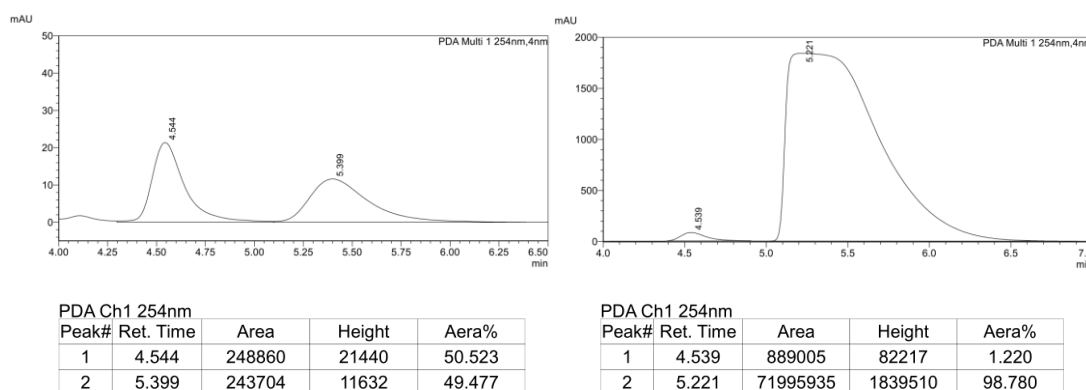

**(E)-1-(2-phenyl-1-((tetrahydro-2H-pyran-4-yl)sulfonyl)vinyl)naphthalen-2-ol (3d)**

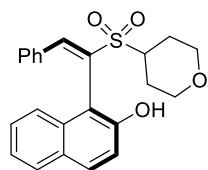

Purification by flash chromatography (petroleum ether/acetone = 4/1). White solid; 85% yield;  $[\alpha]_D^{20} = +140.2$  ( $c = 0.10$  in  $\text{CHCl}_3$ );  $^1\text{H NMR}$  (400 MHz,  $\text{CDCl}_3$ )  $\delta$  (ppm) 8.14 (s, 1H), 7.92 (d,  $J = 8.8$  Hz, 1H), 7.84–7.82 (m, 1H), 7.77 (s, 1H), 7.56–7.54 (m, 1H), 7.35–7.31 (m, 3H), 7.19 (t,  $J = 7.2$  Hz, 1H), 7.07 (t,  $J = 7.6$  Hz, 2H), 6.99 (d,  $J = 7.6$  Hz, 2H), 4.02–3.95 (m, 2H), 3.15–2.99 (m, 3H), 2.04–1.82 (m, 4H);  $^{13}\text{C NMR}$  (100 MHz,  $\text{CDCl}_3$ )  $\delta$  (ppm) 153.9, 145.1, 132.5, 132.3, 132.0, 131.7, 130.9, 130.4, 129.4, 128.9, 128.7, 127.6, 124.2, 123.0, 120.0, 110.9, 66.6, 66.2, 55.9, 26.0, 24.9; HRMS (ESI) for  $\text{C}_{23}\text{H}_{22}\text{NaO}_4\text{S}^+$  calcd. 417.1131, found: 417.1143; **HPLC analysis:** CHIRALPAK AD-H (hexane/*i*-PrOH = 80/20, 1.0 mL/min,  $\lambda = 254$  nm,  $t_R = 14.522$  min (minor),  $t_R = 18.393$  min (major)).

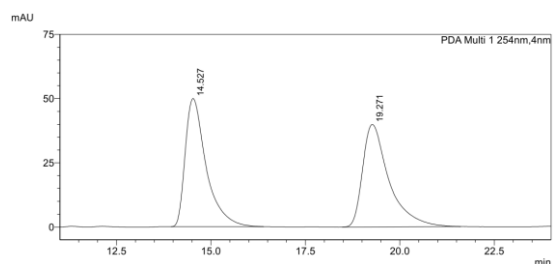

| PDA Ch1 254nm |           |         |        |        |
|---------------|-----------|---------|--------|--------|
| Peak#         | Ret. Time | Area    | Height | Aera%  |
| 1             | 14.527    | 1924995 | 49920  | 49.912 |
| 2             | 19.271    | 1931763 | 39893  | 50.088 |

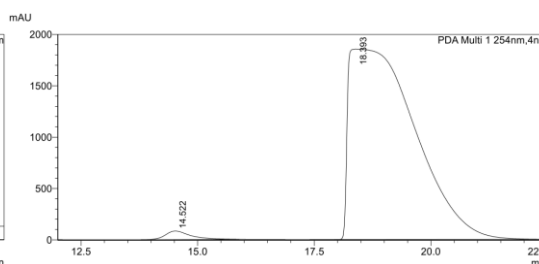

| PDA Ch1 254nm |           |           |         |        |
|---------------|-----------|-----------|---------|--------|
| Peak#         | Ret. Time | Area      | Height  | Aera%  |
| 1             | 14.522    | 3164209   | 83378   | 1.683  |
| 2             | 18.393    | 184856381 | 1853963 | 98.317 |

**(E)-1-(1-(cyclopentylsulfonyl)-2-phenylvinyl)naphthalen-2-ol (3e)**

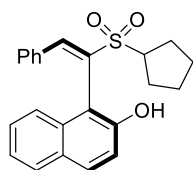

Purification by flash chromatography (petroleum ether/acetone = 4/1). White solid; 78% yield;  $[\alpha]_D^{20} = +206.1$  ( $c = 0.10$  in  $\text{CHCl}_3$ );  $^1\text{H NMR}$  (400 MHz,  $\text{CDCl}_3$ )  $\delta$  (ppm) 8.17 (s, 1H), 8.09 (s, 1H), 7.91 (d,  $J = 8.8$  Hz, 1H), 7.83–7.80 (m, 1H), 7.57–7.55 (m, 1H), 7.35 (d,  $J = 8.8$  Hz, 1H), 7.33–7.28 (m, 2H), 7.17 (t,  $J = 7.2$  Hz, 1H), 7.04 (t,  $J = 8.0$  Hz, 2H), 6.97 (d,  $J = 7.6$  Hz, 2H), 3.33–3.25 (m, 1H), 2.24–2.09 (m, 2H), 1.84–1.74 (m, 3H), 1.70–1.63 (m, 1H), 1.61–1.52 (m, 1H), 1.46–1.39 (m, 1H);  $^{13}\text{C NMR}$  (100 MHz,  $\text{CDCl}_3$ )  $\delta$  (ppm) 154.5, 143.5, 132.5, 132.4, 132.3, 131.7, 130.8, 130.5, 129.5, 128.8, 128.6, 127.4, 124.0, 123.1, 120.7, 111.2, 58.6, 28.6, 26.3, 26.3, 26.2; **HPLC analysis:** CHIRALPAK AD-H (hexane/*i*-PrOH = 70/30, 1.0 mL/min,  $\lambda = 254$  nm,  $t_R = 5.841$  min (minor),  $t_R = 9.579$  min (major)).<sup>[1]</sup>

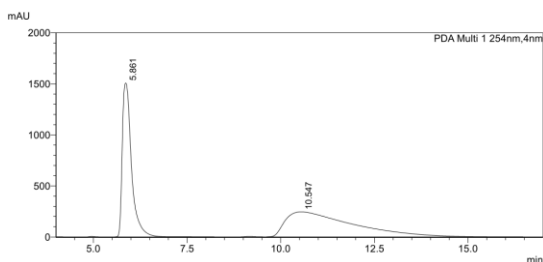

| PDA Ch1 254nm |           |          |         |        |
|---------------|-----------|----------|---------|--------|
| Peak#         | Ret. Time | Area     | Height  | Aera%  |
| 1             | 5.861     | 25907394 | 1506986 | 45.642 |
| 2             | 10.547    | 30854974 | 245483  | 54.358 |

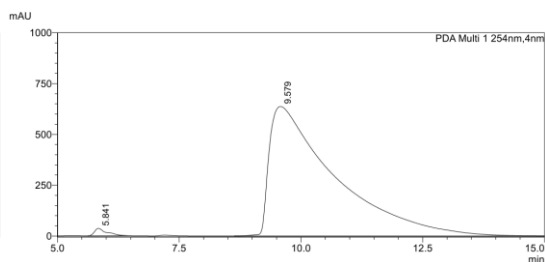

| PDA Ch1 254nm |           |          |        |        |
|---------------|-----------|----------|--------|--------|
| Peak#         | Ret. Time | Area     | Height | Aera%  |
| 1             | 5.841     | 623898   | 36212  | 1.042  |
| 2             | 9.579     | 59274555 | 636867 | 98.958 |

**(E)-1-(1-(cyclopentylsulfonyl)-2-(4-methoxyphenyl)vinyl)naphthalen-2-ol (3f)**

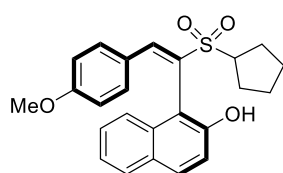

Purification by flash chromatography (petroleum ether/acetone = 4/1). White solid; 52% yield;  $[\alpha]_D^{20} = +285.2$  ( $c = 0.10$  in  $\text{CHCl}_3$ );  $^1\text{H NMR}$  (400 MHz,  $\text{CDCl}_3$ )  $\delta$  (ppm) 8.10 (s, 2H), 7.91 (d,  $J = 8.8$  Hz, 1H), 7.84–7.81 (m, 1H), 7.59–7.57 (m, 1H),

7.37–7.31 (m, 3H), 6.90 (d,  $J = 8.8$  Hz, 2H), 6.55 (d,  $J = 8.8$  Hz, 2H), 3.66 (s, 3H), 3.31–3.24 (m, 1H), 2.23–2.08 (m, 2H), 1.84–1.74 (m, 3H), 1.69–1.63 (m, 1H), 1.58–1.52 (m, 1H), 1.45–1.39 (m, 1H);  $^{13}\text{C NMR}$  (100 MHz,  $\text{CDCl}_3$ )  $\delta$  (ppm) 161.5, 154.5, 143.1, 132.6, 132.2, 131.8, 129.5, 129.1, 128.8, 127.4, 124.9, 124.0, 123.3, 120.8, 114.1, 111.4, 58.6, 55.2, 28.6, 26.4, 26.3, 26.2; **HPLC analysis:** CHIRALPAK AD-H (hexane/*i*-PrOH = 70/30, 1.0 mL/min,  $\lambda = 254$  nm,  $t_R = 8.605$  min (minor),  $t_R = 13.914$  min (major)).<sup>[1]</sup>

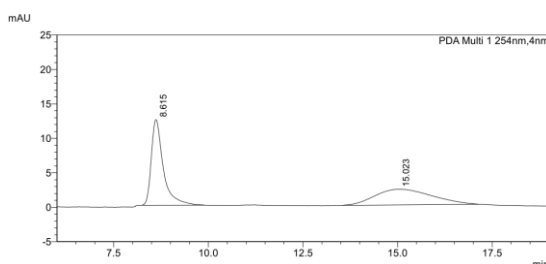

| PDA Ch1 254nm |           |        |        |        |
|---------------|-----------|--------|--------|--------|
| Peak#         | Ret. Time | Area   | Height | Aera%  |
| 1             | 8.615     | 273014 | 12424  | 53.329 |
| 2             | 15.023    | 238929 | 2289   | 46.671 |

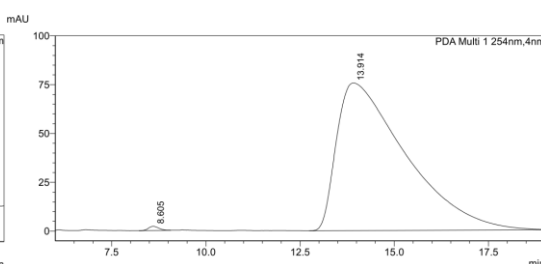

| PDA Ch1 254nm |           |         |        |        |
|---------------|-----------|---------|--------|--------|
| Peak#         | Ret. Time | Area    | Height | Aera%  |
| 1             | 8.605     | 40761   | 2143   | 0.420  |
| 2             | 13.914    | 9667989 | 75620  | 99.580 |

**(E)-1-(2-(4-butylphenyl)-1-(cyclopentylsulfonyl)vinyl)naphthalen-2-ol (3g)**

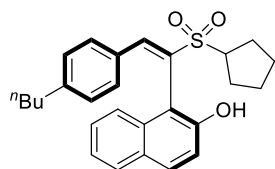

Purification by flash chromatography (petroleum ether/acetone = 4/1). White solid; 71% yield;  $[\alpha]_D^{20} = +265.6$  ( $c = 0.10$  in  $\text{CHCl}_3$ );  $^1\text{H NMR}$  (400 MHz,  $\text{CDCl}_3$ )  $\delta$  (ppm) 8.14 (s, 1H), 8.05 (s, 1H), 7.90 (d,  $J = 8.8$  Hz, 1H), 7.83–7.79 (m, 1H), 7.60–7.58 (m, 1H), 7.36–7.30 (m, 3H), 6.89–6.84 (m, 4H), 3.32–3.25 (m, 1H), 2.43 (t,  $J = 7.6$  Hz, 2H), 2.24–2.08 (m, 2H), 1.86–1.74 (m, 3H), 1.69–1.63 (m, 1H), 1.58–1.52 (m, 1H), 1.47–1.39 (m, 3H), 1.24–1.16 (m, 2H), 0.82 (t,  $J = 7.2$  Hz, 3H);  $^{13}\text{C NMR}$  (100 MHz,  $\text{CDCl}_3$ )  $\delta$  (ppm) 154.4, 146.4, 143.5, 132.2, 131.9, 131.0, 130.7, 129.7, 129.5, 128.8, 127.4, 124.0, 123.3, 120.7, 111.4, 58.6, 35.4, 33.0, 28.6, 26.4, 26.3, 26.2, 22.2, 13.9; **HPLC analysis:** CHIRALPAK AD-H (hexane/*i*-PrOH = 80/20, 1.0 mL/min,  $\lambda = 254$  nm,  $t_R = 17.855$  min (minor),  $t_R = 30.070$  min (major)).<sup>[1]</sup>

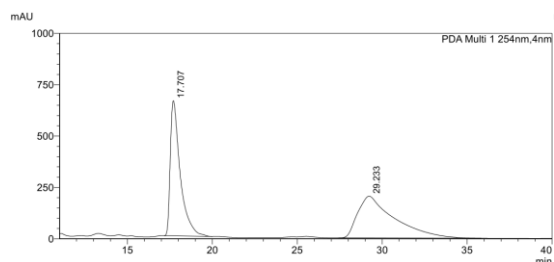

| Peak# | Ret. Time | Area     | Height | Aera%  |
|-------|-----------|----------|--------|--------|
| 1     | 17.707    | 26794687 | 658097 | 46.719 |
| 2     | 29.233    | 30558627 | 203894 | 53.281 |

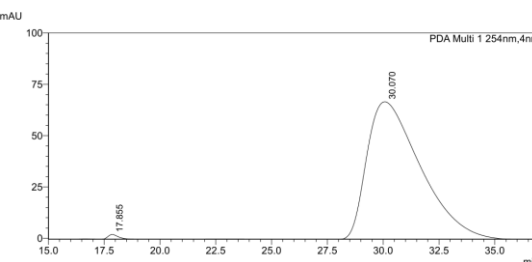

| Peak# | Ret. Time | Area     | Height | Aera%  |
|-------|-----------|----------|--------|--------|
| 1     | 17.855    | 87221    | 2446   | 0.768  |
| 2     | 30.070    | 11274239 | 67228  | 99.232 |

**(E)-1-(2-(4-(tert-butyl)phenyl)-1-(cyclopentylsulfonyl)vinyl)naphthalen-2-ol (3h)**

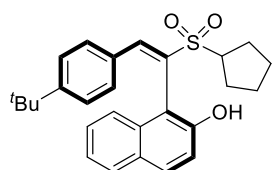

Purification by flash chromatography (petroleum ether/acetone = 4/1). White solid; 52% yield;  $[\alpha]_D^{20} = +284.3$  ( $c = 0.10$  in  $\text{CHCl}_3$ );  $^1\text{H NMR}$  (400 MHz,  $\text{CDCl}_3$ )  $\delta$  (ppm) 8.14 (s, 1H), 7.96 (s, 1H), 7.92 (d,  $J = 8.8$  Hz, 1H), 7.85–7.83 (m, 1H), 7.63–7.61 (m, 1H), 7.36–7.33 (m, 3H), 7.08 (d,  $J = 8.4$  Hz, 2H), 6.90 (d,  $J = 8.4$  Hz, 2H), 3.32–3.24 (m, 1H), 2.24–2.08 (m, 2H), 1.86–1.74 (m, 3H), 1.71–1.64 (m, 1H), 1.58–1.52 (m, 1H), 1.45–1.41 (m, 1H), 1.16 (s, 9H);  $^{13}\text{C NMR}$  (100 MHz,  $\text{CDCl}_3$ )  $\delta$  (ppm) 154.5, 154.2, 143.3, 132.2, 132.0, 131.0, 130.6, 129.4, 129.4, 128.8, 127.5, 125.8, 124.0, 123.3, 120.7, 111.4, 58.6, 34.8, 30.9, 28.6, 26.4, 26.3, 26.2; HRMS (ESI) for  $\text{C}_{27}\text{H}_{30}\text{NaO}_3\text{S}^+$  calcd. 457.1808, found:



457.1817; **HPLC analysis:** CHIRALPAK AD-H (hexane/*i*-PrOH = 80/20, 1.0 mL/min,  $\lambda = 254$  nm,  $t_R = 13.578$  min (minor),  $t_R = 21.456$  min (major).

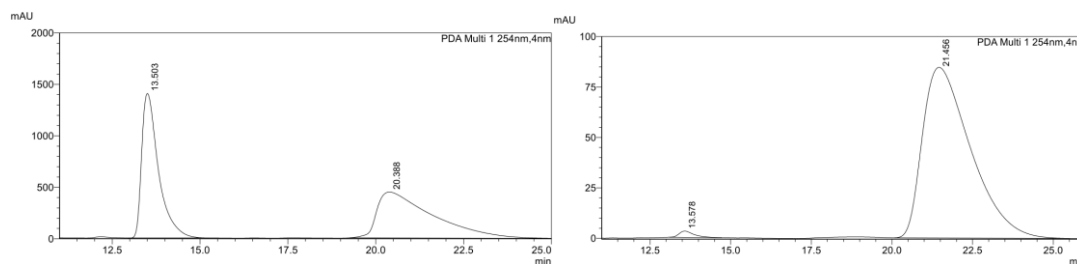

| PDA Ch1 254nm |           |          |         |        |
|---------------|-----------|----------|---------|--------|
| Peak#         | Ret. Time | Area     | Height  | Aera%  |
| 1             | 13.503    | 46642236 | 1404199 | 48.727 |
| 2             | 20.388    | 49078766 | 446429  | 51.273 |

| PDA Ch1 254nm |           |         |        |        |
|---------------|-----------|---------|--------|--------|
| Peak#         | Ret. Time | Area    | Height | Aera%  |
| 1             | 13.578    | 101044  | 3130   | 1.137  |
| 2             | 21.456    | 8783167 | 84612  | 98.863 |

**(E)-1-(1-(cyclopentylsulfonyl)-2-(4-fluorophenyl)vinyl)naphthalen-2-ol (3i)**

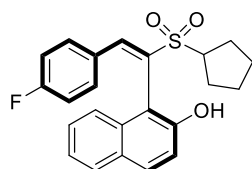

Purification by flash chromatography (petroleum ether/acetone = 4/1). White solid; 71% yield;  $[\alpha]_D^{20} = +213.9$  ( $c = 0.10$  in  $\text{CHCl}_3$ );

$^1\text{H NMR}$  (400 MHz,  $\text{CDCl}_3$ )  $\delta$  (ppm) 8.13 (d,  $J = 2.8$  Hz, 2H), 7.92 (d,  $J = 8.8$  Hz, 1H), 7.84–7.81(m, 1H), 7.54–7.51 (m, 1H), 7.37–7.31 (m, 3H), 6.96 (dd,  $J = 8.4, 5.6$  Hz, 2H), 6.74 (t,  $J = 8.4$  Hz, 2H), 3.32–3.25 (m, 1H), 2.21–2.09 (m, 2H), 1.85–1.75 (m, 3H), 1.70–1.67 (m, 1H), 1.59–1.53 (m, 1H), 1.47–1.41 (m, 1H);  $^{13}\text{C NMR}$  (100 MHz,  $\text{CDCl}_3$ )  $\delta$  (ppm) 163.8 (d,  $J = 251.0$  Hz), 154.5, 142.1, 132.7, 132.6, 132.5, 132.1 (d,  $J = 3.0$  Hz), 131.5, 129.5, 128.9, 128.6 (d,  $J = 3.0$  Hz), 127.6, 124.2, 123.0, 120.8, 115.9 (d,  $J = 22.0$  Hz), 110.8, 58.6, 28.6, 26.3, 26.3, 26.2; **HPLC analysis:** CHIRALPAK AD-H (hexane/*i*-PrOH = 70/30, 1.0 mL/min,  $\lambda = 254$  nm,  $t_R = 6.527$  min (minor),  $t_R = 10.403$  min (major).<sup>[1]</sup>

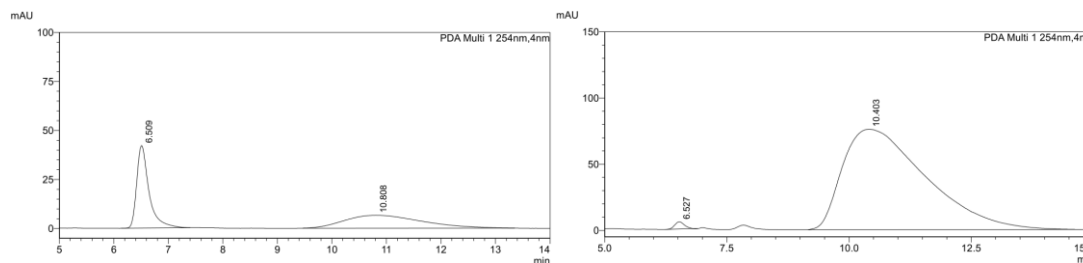

| PDA Ch1 254nm |           |        |        |        |
|---------------|-----------|--------|--------|--------|
| Peak#         | Ret. Time | Area   | Height | Aera%  |
| 1             | 6.509     | 660777 | 42148  | 50.529 |
| 2             | 10.808    | 646950 | 6595   | 49.471 |

| PDA Ch1 254nm |           |         |        |        |
|---------------|-----------|---------|--------|--------|
| Peak#         | Ret. Time | Area    | Height | Aera%  |
| 1             | 6.527     | 75817   | 5428   | 0.836  |
| 2             | 10.403    | 8994270 | 75949  | 99.164 |

**(E)-1-(2-(4-chlorophenyl)-1-(cyclopentylsulfonyl)vinyl)naphthalen-2-ol (3j)**

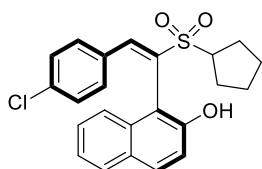

Purification by flash chromatography (petroleum ether/acetone = 4/1). White solid; 61% yield;  $[\alpha]_D^{20} = +166.0$  ( $c = 0.10$  in  $\text{CHCl}_3$ );  $^1\text{H NMR}$  (400 MHz,  $\text{CDCl}_3$ )  $\delta$  (ppm) 8.11 (s, 2H), 7.91 (d,  $J = 9.2$  Hz, 1H), 7.84–7.80 (m, 1H), 7.53–7.51 (m, 1H), 7.36–7.31 (m, 3H), 7.02 (d,  $J = 8.4$  Hz, 2H), 6.89 (d,  $J = 8.4$  Hz, 2H), 3.33–3.25 (m, 1H), 2.21–2.08 (m, 2H), 1.85–1.74 (m, 3H), 1.70–1.64 (m, 1H), 1.61–1.52 (m, 1H), 1.48–1.40 (m, 1H);  $^{13}\text{C NMR}$  (100 MHz,  $\text{CDCl}_3$ )  $\delta$  (ppm) 154.5, 142.0, 136.8, 133.2, 132.6, 131.6, 131.5, 130.8, 129.5, 129.0, 128.9, 127.6, 124.2, 122.9, 122.3, 120.7, 110.7, 58.6, 28.6, 26.3, 26.3, 26.2; HRMS (ESI) for  $\text{C}_{23}\text{H}_{21}\text{ClNaO}_3\text{S}^+$  calcd. 435.0792, found: 435.0801; **HPLC analysis:** CHIRALPAK AS-H (hexane/*i*-PrOH = 80/20, 1.0 mL/min,  $\lambda = 254$  nm,  $t_R = 9.086$  min (major),  $t_R = 12.113$  min (minor).

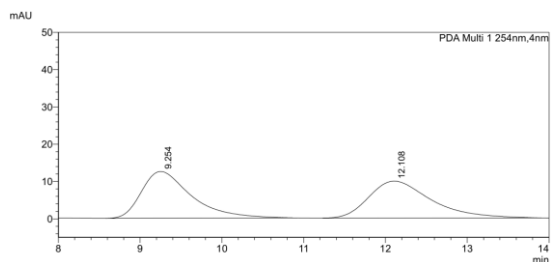

| Peak# | Ret. Time | Area   | Height | Aera%  |
|-------|-----------|--------|--------|--------|
| 1     | 9.254     | 531713 | 12556  | 50.401 |
| 2     | 12.108    | 523245 | 9906   | 49.599 |

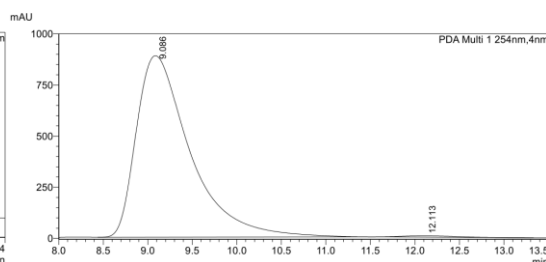

| Peak# | Ret. Time | Area     | Height | Aera%  |
|-------|-----------|----------|--------|--------|
| 1     | 9.086     | 37307311 | 887870 | 99.282 |
| 2     | 12.113    | 269896   | 6519   | 0.718  |

**(E)-1-(2-(4-bromophenyl)-1-(cyclopentylsulfonyl)vinyl)naphthalen-2-ol (3k)**

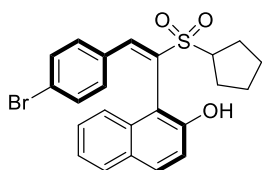

Purification by flash chromatography (petroleum ether/acetone = 4/1). White solid; 66% yield;  $[\alpha]_D^{20} = +248.5$  ( $c = 0.10$  in  $\text{CHCl}_3$ );  $^1\text{H NMR}$  (400 MHz,  $\text{CDCl}_3$ )  $\delta$  (ppm) 8.09 (s, 1H), 7.91 (d,  $J = 8.8$  Hz, 1H), 7.82 (s, 1H), 7.52 (s, 1H), 7.34 (d,  $J = 8.4$  Hz, 3H), 7.18 (d,  $J = 8.0$  Hz, 2H), 6.82 (d,  $J = 7.6$  Hz, 2H), 3.29 (s, 1H), 2.18–2.10 (m, 2H), 1.78 (s, 3H), 1.68 (d,  $J = 6.8$  Hz, 1H), 1.57 (s, 1H), 1.43 (s, 1H), 1.26 (s, 1H);  $^{13}\text{C NMR}$  (100 MHz,  $\text{CDCl}_3$ )  $\delta$  (ppm) 154.4, 142.0, 133.5, 132.6, 131.9, 131.7, 131.4, 131.2, 129.5, 128.9, 127.6, 125.4, 124.2, 122.9, 120.7, 110.8, 58.7, 28.5, 26.3, 26.2; HRMS (ESI) for  $\text{C}_{23}\text{H}_{21}\text{BrNaO}_3\text{S}^+$  calcd. 479.0287, found: 479.0294; **HPLC analysis:**

CHIRALPAK AS-H (hexane/*i*-PrOH = 80/20, 1.0 mL/min,  $\lambda = 254$  nm,  $t_R = 8.952$  min (major),  $t_R = 12.273$  min (minor).

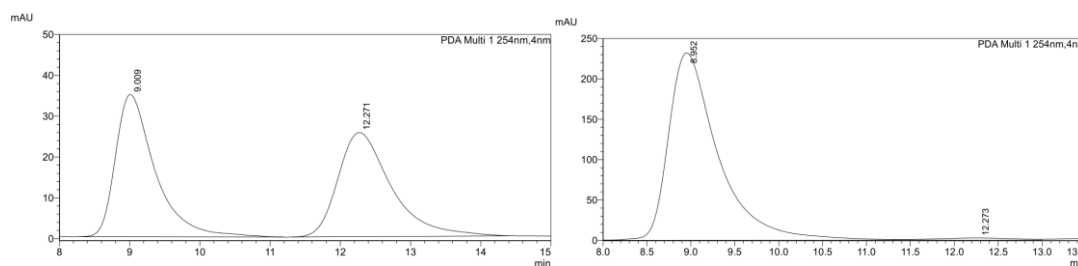

| PDA Ch1 254nm |           |         |        |        |
|---------------|-----------|---------|--------|--------|
| Peak#         | Ret. Time | Area    | Height | Aera%  |
| 1             | 9.009     | 1374064 | 34836  | 50.518 |
| 2             | 12.271    | 1345888 | 25507  | 49.482 |

| PDA Ch1 254nm |           |         |        |        |
|---------------|-----------|---------|--------|--------|
| Peak#         | Ret. Time | Area    | Height | Aera%  |
| 1             | 8.952     | 9132655 | 232049 | 98.033 |
| 2             | 12.273    | 183220  | 2795   | 1.967  |

**(E)-1-(1-(cyclopentylsulfonyl)-2-(4-(methylthio)phenyl)vinyl)naphthalen-2-ol (3l)**

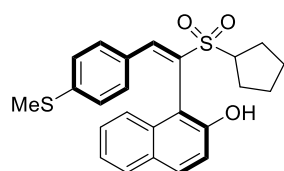

Purification by flash chromatography (petroleum ether/acetone = 4/1). White solid; 81% yield;  $[\alpha]_D^{20} = +308.6$  ( $c = 0.10$  in  $\text{CHCl}_3$ );  $^1\text{H NMR}$  (400 MHz,  $\text{CDCl}_3$ )  $\delta$  (ppm) 8.09 (s, 2H), 7.90 (d,  $J = 9.2$  Hz, 1H), 7.83–7.80 (m, 1H), 7.58–7.55 (m, 1H),

7.36–7.30 (m, 3H), 6.85 (s, 4H), 3.32–3.24 (m, 1H), 2.32 (s, 3H), 2.23–2.08 (m, 2H), 1.85–1.73 (m, 3H), 1.69–1.63 (m, 1H), 1.58–1.52 (m, 1H), 1.45–1.39 (m, 1H);  $^{13}\text{C NMR}$  (100 MHz,  $\text{CDCl}_3$ )  $\delta$  (ppm) 154.4, 143.1, 142.9, 132.3, 131.7, 131.0, 130.8, 129.5, 128.8, 128.5, 127.5, 125.3, 124.1, 123.2, 120.7, 111.2, 58.6, 28.6, 26.4, 26.3, 26.2, 14.6; **HPLC analysis:** CHIRALPAK AD-H (hexane/*i*-PrOH = 70/30, 1.0 mL/min,  $\lambda = 254$  nm,  $t_R = 8.508$  min (minor),  $t_R = 18.154$  min (major)).<sup>[1]</sup>

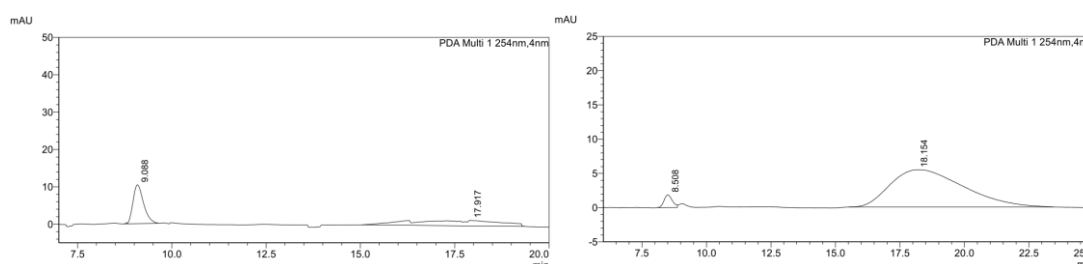

| PDA Ch1 254nm |           |        |        |        |
|---------------|-----------|--------|--------|--------|
| Peak#         | Ret. Time | Area   | Height | Aera%  |
| 1             | 9.088     | 202912 | 10373  | 46.003 |
| 2             | 17.917    | 238174 | 1469   | 53.997 |

| PDA Ch1 254nm |           |         |        |        |
|---------------|-----------|---------|--------|--------|
| Peak#         | Ret. Time | Area    | Height | Aera%  |
| 1             | 8.508     | 41906   | 1865   | 3.754  |
| 2             | 18.154    | 1074422 | 5452   | 96.246 |

**(E)-1-(1-(cyclopentylsulfonyl)-2-(4-(trifluoromethyl)phenyl)vinyl)naphthalen-2-ol (3m)**

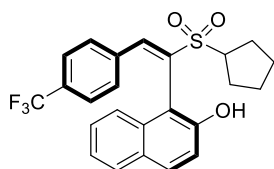

Purification by flash chromatography (petroleum ether/acetone = 4/1). White solid; 53% yield;  $[\alpha]_D^{20} = +191.0$  ( $c = 0.10$  in  $\text{CHCl}_3$ );  $^1\text{H NMR}$  (400 MHz,  $\text{CDCl}_3$ )  $\delta$  (ppm) 8.19 (s, 1H), 8.07 (s, 1H), 7.93 (d,  $J = 9.2$  Hz, 1H), 7.84–7.81 (m, 1H), 7.53–7.50 (m, 1H), 7.33 (dd,  $J = 16.8, 9.2$  Hz, 5H), 7.09 (d,  $J = 8.0$  Hz, 2H), 3.34–3.27 (m, 1H), 2.22–2.09 (m, 2H), 1.85–1.75 (m, 3H), 1.71–1.65 (m, 1H), 1.60–1.59 (m, 1H), 1.48–1.43 (m, 1H);  $^{13}\text{C NMR}$  (100 MHz,  $\text{CDCl}_3$ )  $\delta$  (ppm) 154.4, 141.5, 135.6, 132.7, 131.9 (q,  $J = 33.0$  Hz), 131.4, 130.4, 129.4, 129.0, 127.7, 125.6 (q,  $J = 4.0$  Hz), 124.3, 123.8 (q,  $J = 271.0$  Hz), 122.7, 120.7, 110.5, 58.6, 29.7, 28.5, 26.3, 26.3 26.2; **HPLC analysis:** CHIRALPAK AD-H (hexane/*i*-PrOH = 70/30, 1.0 mL/min,  $\lambda = 254$  nm,  $t_R = 6.847$  min (minor),  $t_R = 8.308$  min (major)).<sup>[1]</sup>

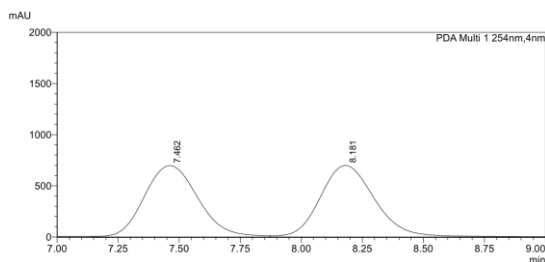

| Peak# | Ret. Time | Area     | Height | Aera%  |
|-------|-----------|----------|--------|--------|
| 1     | 7.462     | 10649937 | 696123 | 49.436 |
| 2     | 8.181     | 10892809 | 699342 | 50.564 |

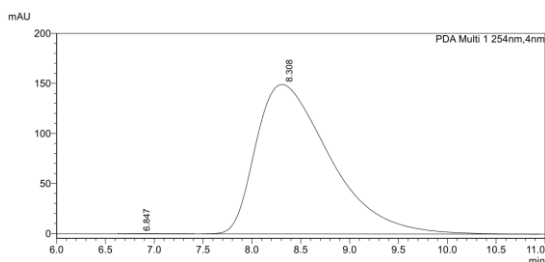

| Peak# | Ret. Time | Area    | Height | Aera%  |
|-------|-----------|---------|--------|--------|
| 1     | 6.847     | 4098    | 171    | 0.052  |
| 2     | 8.308     | 7877667 | 149385 | 99.948 |

### *(E)*-1-(1-(cyclopentylsulfonyl)-2-(*m*-tolyl)vinyl)naphthalen-2-ol (3n)

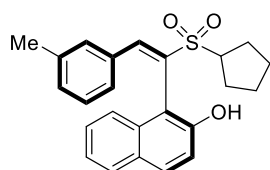

Purification by flash chromatography (petroleum ether/acetone = 4/1). White solid; 54% yield;  $[\alpha]_D^{20} = +308.6$  ( $c = 0.10$  in  $\text{CHCl}_3$ );  $^1\text{H NMR}$  (400 MHz,  $\text{CDCl}_3$ )  $\delta$  (ppm) 8.13 (s, 2H), 7.91 (d,  $J = 9.2$  Hz, 1H), 7.83–7.79 (m, 1H), 7.56–7.52 (m, 1H), 7.35 (d,  $J = 8.8$  Hz, 1H), 7.32–7.28 (m, 2H), 6.98 (d,  $J = 7.6$  Hz, 1H), 6.89 (t,  $J = 7.6$  Hz, 1H), 6.82 (s, 1H), 6.70 (d,  $J = 8.0$  Hz, 1H), 3.33–3.26 (m, 1H), 2.24–2.09 (m, 2H), 2.05 (s, 3H), 1.86–1.74 (m, 3H), 1.70–1.64 (m, 1H), 1.59–1.52 (m, 1H), 1.48–1.40 (m, 1H);  $^{13}\text{C NMR}$  (100 MHz,  $\text{CDCl}_3$ )  $\delta$  (ppm) 154.5, 143.7, 138.1, 132.3, 132.2, 132.1, 131.7, 131.7, 131.6, 129.5, 128.7, 128.5, 127.4, 127.2, 124.0, 123.2, 120.6, 111.3, 58.5, 28.6, 26.3, 26.3, 26.2, 21.1; HRMS (ESI) for  $\text{C}_{24}\text{H}_{24}\text{NaO}_3\text{S}^+$  calcd. 415.1338, found: 417.1349; **HPLC analysis:**

CHIRALPAK AD-H (hexane/*i*-PrOH = 70/30, 1.0 mL/min,  $\lambda = 254$  nm,  $t_R = 5.356$  min (minor),  $t_R = 7.438$  min (major).

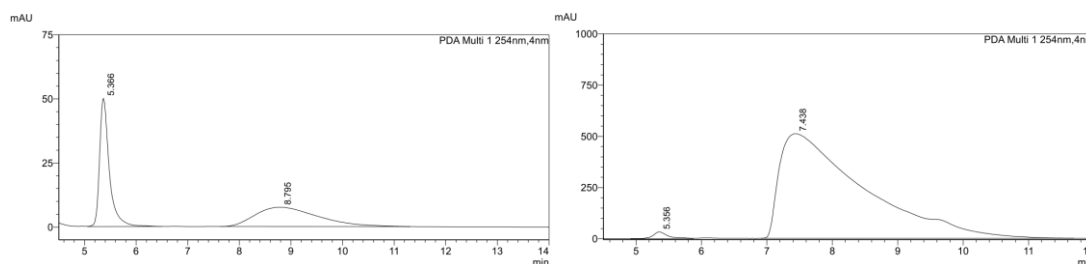

| PDA Ch1 254nm |           |        |        |        |
|---------------|-----------|--------|--------|--------|
| Peak#         | Ret. Time | Area   | Height | Aera%  |
| 1             | 5.366     | 654162 | 49974  | 50.632 |
| 2             | 8.795     | 637837 | 7540   | 49.368 |

| PDA Ch1 254nm |           |          |        |        |
|---------------|-----------|----------|--------|--------|
| Peak#         | Ret. Time | Area     | Height | Aera%  |
| 1             | 5.356     | 554532   | 33219  | 1.202  |
| 2             | 7.438     | 45567689 | 510381 | 98.798 |

**(E)-1-(1-(cyclopentylsulfonyl)-2-(*o*-tolyl)vinyl)naphthalen-2-ol (3o)**

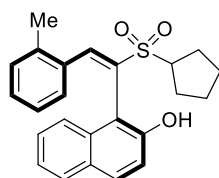

Purification by flash chromatography (petroleum ether/acetone = 4/1). White solid; 77% yield;  $[\alpha]_D^{20} = +45.8$  ( $c = 0.10$  in  $\text{CHCl}_3$ );  $^1\text{H}$  NMR (400 MHz,  $\text{CDCl}_3$ )  $\delta$  (ppm) 8.42 (s, 1H), 8.21 (s, 1H), 7.82 (d,  $J = 8.8$  Hz, 1H), 7.72 (d,  $J = 7.2$  Hz, 1H), 7.47 (d,  $J = 8.0$  Hz, 1H), 7.31 (d,  $J = 8.8$  Hz, 1H), 7.28–7.22 (m, 2H), 7.07 (d,  $J = 7.6$  Hz, 1H), 6.99 (td,  $J = 7.2, 0.8$  Hz, 1H), 6.68 (d,  $J = 7.2$  Hz, 1H), 6.63 (t,  $J = 7.2$  Hz, 1H), 3.32–3.24 (m, 1H), 2.52 (s, 3H), 2.24–2.10 (m, 2H), 1.88–1.74 (m, 3H), 1.70–1.64 (m, 1H), 1.59–1.54 (m, 1H), 1.47–1.40 (m, 1H);  $^{13}\text{C}$  NMR (100 MHz,  $\text{CDCl}_3$ )  $\delta$  (ppm) 155.1, 142.7, 137.8, 133.4, 132.2, 131.7, 131.5, 130.2, 130.1, 129.3, 128.7, 127.9, 127.1, 125.9, 123.8, 122.9, 120.3, 111.2, 58.6, 28.6, 26.4, 26.3, 20.1; HRMS (ESI) for  $\text{C}_{24}\text{H}_{24}\text{NaO}_3\text{S}^+$  calcd. 415.1338, found: 417.1349; HPLC analysis: CHIRALPAK AD-H (hexane/*i*-PrOH = 70/30, 1.0 mL/min,  $\lambda = 254$  nm,  $t_R = 4.798$  min (minor),  $t_R = 7.562$  min (major).

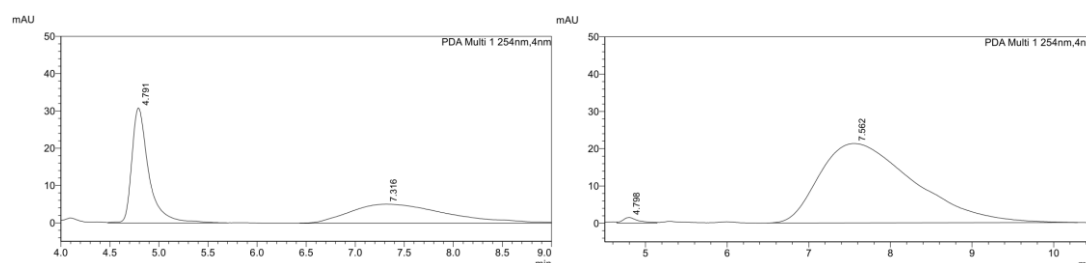

| PDA Ch1 254nm |           |        |        |        |
|---------------|-----------|--------|--------|--------|
| Peak#         | Ret. Time | Area   | Height | Aera%  |
| 1             | 4.791     | 368961 | 30856  | 51.164 |
| 2             | 7.316     | 352172 | 5096   | 48.836 |

| PDA Ch1 254nm |           |         |        |        |
|---------------|-----------|---------|--------|--------|
| Peak#         | Ret. Time | Area    | Height | Aera%  |
| 1             | 4.798     | 20456   | 1541   | 1.181  |
| 2             | 7.562     | 1711791 | 21276  | 98.819 |

**(E)-1-(2-(3-bromophenyl)-1-(cyclopentylsulfonyl)vinyl)naphthalen-2-ol (3p)**

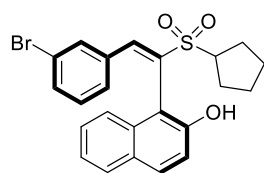

Purification by flash chromatography (petroleum ether/acetone = 4/1). White solid; 67% yield;  $[\alpha]_D^{20} = +16.0$  ( $c = 0.10$  in  $\text{CHCl}_3$ );  $^1\text{H NMR}$  (400 MHz,  $\text{CDCl}_3$ )  $\delta$  (ppm) 8.10 (d,  $J = 20.8$  Hz, 2H), 7.92 (d,  $J = 8.8$  Hz, 1H), 7.83–7.81 (m, 1H), 7.52–7.50 (m, 1H), 7.36–7.31 (m, 3H), 7.27 (d,  $J = 8.4$  Hz, 1H), 7.16 (s, 1H), 6.89–6.81 (m, 2H), 3.34–3.27 (m, 1H), 2.21–2.09 (m, 2H), 1.86–1.75 (m, 3H), 1.71–1.68 (m, 1H), 1.59–1.56 (m, 1H), 1.47–1.42 (m, 1H);  $^{13}\text{C NMR}$  (100 MHz,  $\text{CDCl}_3$ )  $\delta$  (ppm) 154.5, 141.7, 134.5, 134.3, 133.5, 133.5, 132.7, 131.4, 130.1, 129.5, 128.9, 128.3, 127.6, 124.2, 122.8, 122.5, 120.6, 110.6, 58.6, 28.6, 26.3, 26.3, 26.2; HRMS (ESI) for  $\text{C}_{23}\text{H}_{21}\text{BrNaO}_3\text{S}^+$  calcd. 479.0287, found: 479.0294; HPLC analysis: CHIRALPAK AD-H (hexane/*i*-PrOH = 70/30, 1.0 mL/min,  $\lambda = 254$  nm,  $t_R = 5.813$  min (minor),  $t_R = 10.432$  min (major).

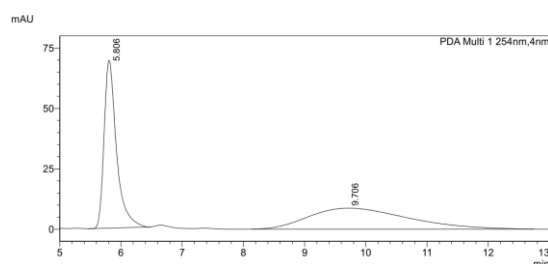

| PDA Ch1 254nm |           |        |        |        |
|---------------|-----------|--------|--------|--------|
| Peak#         | Ret. Time | Area   | Height | Aera%  |
| 1             | 5.806     | 977592 | 69366  | 50.090 |
| 2             | 9.706     | 974086 | 8639   | 49.910 |

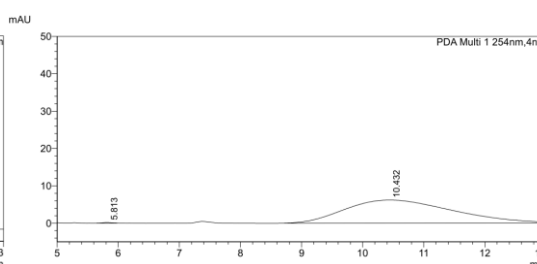

| PDA Ch1 254nm |           |        |        |        |
|---------------|-----------|--------|--------|--------|
| Peak#         | Ret. Time | Area   | Height | Aera%  |
| 1             | 5.813     | 1598   | 147    | 0.211  |
| 2             | 10.432    | 754305 | 6171   | 99.789 |

**(E)-1-(2-(2-chlorophenyl)-1-(cyclopentylsulfonyl)vinyl)naphthalen-2-ol (3q)**

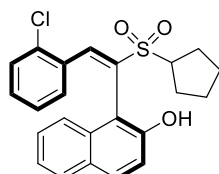

Purification by flash chromatography (petroleum ether/acetone = 4/1). White solid; 61% yield;  $[\alpha]_D^{20} = -26.2$  ( $c = 0.10$  in  $\text{CHCl}_3$ );  $^1\text{H NMR}$  (400 MHz,  $\text{CD}_3\text{CN}$ )  $\delta$  (ppm) 8.32 (s, 1H), 7.95 (s, 1H), 7.85 (d,  $J = 9.2$  Hz, 1H), 7.77 (d,  $J = 8.4$  Hz, 1H), 7.67 (d,  $J = 8.4$  Hz, 1H), 7.41–7.36 (m, 2H), 7.29 (t,  $J = 8.0$  Hz, 1H), 7.22 (d,  $J = 8.8$  Hz, 1H), 7.16–7.11 (m, 1H), 6.92 (dd,  $J = 8.0, 1.2$  Hz, 1H), 6.82 (t,  $J = 7.6$  Hz, 1H), 3.58–3.51 (m, 1H), 2.32 (s, 2H), 2.11–1.93 (m, 3H), 1.90–1.81 (m, 1H), 1.74–1.71 (m, 1H), 1.58–1.55 (m, 1H);  $^{13}\text{C NMR}$  (100 MHz,  $\text{CD}_3\text{CN}$ )  $\delta$  (ppm) 154.3, 140.9, 138.2, 134.7, 133.6, 132.3, 132.2, 131.6, 129.9, 129.4, 129.3, 128.8, 127.7, 127.3, 124.7, 124.3, 118.7, 117.9, 111.1, 61.0, 28.3, 26.9, 26.5, 26.3; HRMS (ESI) for  $\text{C}_{23}\text{H}_{21}\text{ClNaO}_3\text{S}^+$  calcd. 435.0792, found:

435.0802; **HPLC analysis:** CHIRALPAK AD-H (hexane/*i*-PrOH = 70/30, 1.0 mL/min,  $\lambda = 254$  nm,  $t_R = 4.972$  min (minor),  $t_R = 15.943$  min (major).

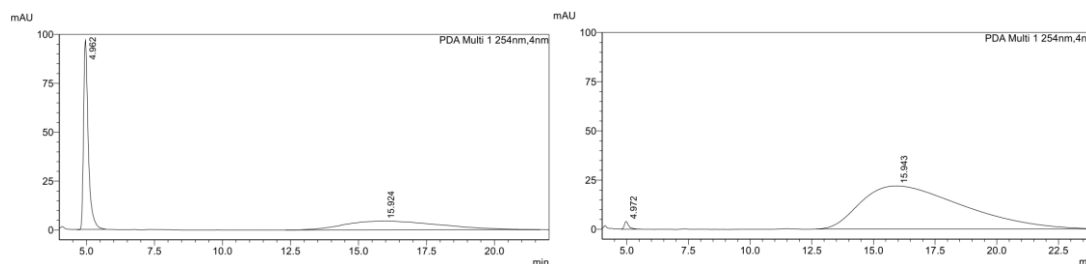

| PDA Ch1 254nm |           |         |        |        |
|---------------|-----------|---------|--------|--------|
| Peak#         | Ret. Time | Area    | Height | Aera%  |
| 1             | 4.962     | 1166723 | 96747  | 51.374 |
| 2             | 15.924    | 1104303 | 4483   | 48.626 |

| PDA Ch1 254nm |           |         |        |        |
|---------------|-----------|---------|--------|--------|
| Peak#         | Ret. Time | Area    | Height | Aera%  |
| 1             | 4.972     | 51016   | 3972   | 0.801  |
| 2             | 15.943    | 6317613 | 21920  | 99.199 |

**(E)-1-(1-(cyclopentylsulfonyl)-2-(2-(trifluoromethoxy)phenyl)vinyl)naphthalen-2-ol (3r)**

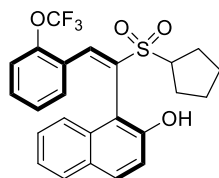

Purification by flash chromatography (petroleum ether/acetone = 4/1). White solid; 51% yield;  $[\alpha]_D^{20} = +74.6$  ( $c = 0.10$  in  $\text{CHCl}_3$ );  $^1\text{H}$  NMR (400 MHz,  $\text{CDCl}_3$ )  $\delta$  (ppm) 8.43 (s, 1H), 8.25 (s, 1H), 7.87 (t,  $J = 8.8$  Hz, 1H), 7.76–7.74 (m, 1H), 7.50–7.48 (m, 1H), 7.34–7.26 (m, 3H), 7.17–7.14 (m, 2H), 6.75–6.70 (m, 2H), 3.33–3.26 (m, 1H), 2.24–2.11 (m, 2H), 1.89–1.77 (m, 3H), 1.73–1.66 (m, 1H), 1.62–1.55 (m, 1H), 1.48–1.42 (m, 1H);  $^{13}\text{C}$  NMR (100 MHz,  $\text{CDCl}_3$ )  $\delta$  (ppm) 155.0, 147.8, 137.4, 135.9, 132.5, 131.7, 131.4, 129.4, 129.2, 128.7, 127.4, 126.8, 126.0, 124.0, 122.7, 121.8, 120.6 (q,  $J = 257.0$  Hz), 120.4, 110.8, 58.7, 28.4, 26.3, 26.2; **HPLC analysis:** CHIRALPAK AD-H (hexane/*i*-PrOH = 90/10, 0.8 mL/min,  $\lambda = 254$  nm,  $t_R = 10.759$  min (minor),  $t_R = 26.244$  min (major)).<sup>[1]</sup>

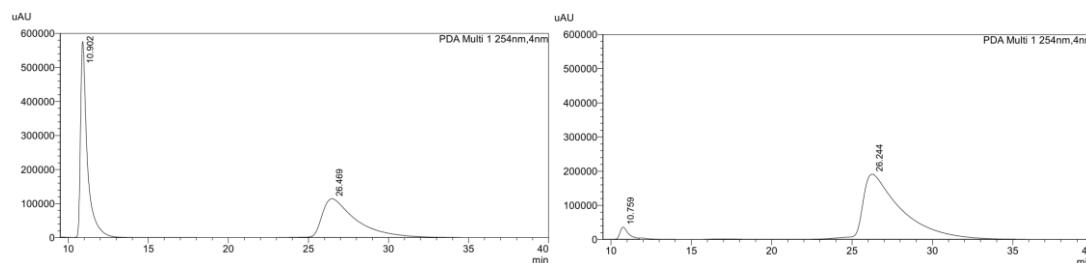

| PDA Ch1 254nm |           |          |        |        |
|---------------|-----------|----------|--------|--------|
| Peak#         | Ret. Time | Area     | Height | Aera%  |
| 1             | 10.902    | 16994267 | 575629 | 50.497 |
| 2             | 26.469    | 16659839 | 113772 | 49.503 |

| PDA Ch1 254nm |           |          |        |        |
|---------------|-----------|----------|--------|--------|
| Peak#         | Ret. Time | Area     | Height | Aera%  |
| 1             | 10.759    | 1304216  | 35312  | 3.987  |
| 2             | 26.244    | 31409745 | 190297 | 96.013 |

**(E)-1-(1-(cyclopentylsulfonyl)-2-(thiophen-3-yl)vinyl)naphthalen-2-ol (3s)**

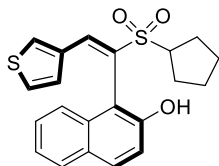

Purification by flash chromatography (petroleum ether/acetone = 4/1). White solid; 66% yield;  $[\alpha]_D^{20} = +317.4$  ( $c = 0.10$  in  $\text{CHCl}_3$ );  $^1\text{H NMR}$  (400 MHz,  $\text{CDCl}_3$ )  $\delta$  (ppm) 8.18 (s, 1H), 8.05 (s, 1H), 7.92 (d,  $J = 8.8$  Hz, 1H), 7.84 (t,  $J = 5.2$  Hz, 1H), 7.61–7.58 (m, 1H), 7.37–7.33 (m, 3H), 7.14 (d,  $J = 2.0$  Hz, 1H), 6.93–6.91 (m, 1H), 6.24 (d,  $J = 5.2$  Hz, 1H), 3.35–3.28 (m, 1H), 2.25–2.09 (m, 2H), 1.87–1.76 (m, 3H), 1.71–1.65 (m, 1H), 1.59–1.54 (m, 1H), 1.48–1.39 (m, 1H);  $^{13}\text{C NMR}$  (100 MHz,  $\text{CDCl}_3$ )  $\delta$  (ppm) 154.3, 137.2, 134.3, 132.4, 132.2, 131.9, 130.4, 129.4, 128.9, 127.6, 127.5, 126.3, 124.1, 123.2, 120.7, 111.3, 58.9, 28.6, 26.4; 26.3, 26.2; **HPLC analysis:** CHIRALPAK AD-H (hexane/*i*-PrOH = 70/30, 1.0 mL/min,  $\lambda = 254$  nm,  $t_R = 6.580$  min (minor),  $t_R = 15.190$  min (major)).<sup>[1]</sup>

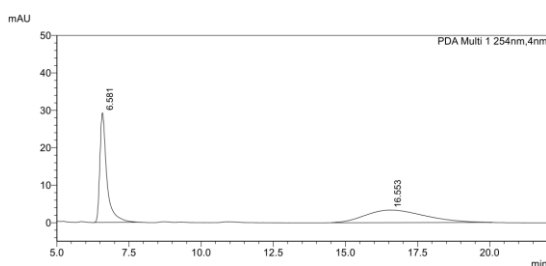

| Peak# | Ret. Time | Area   | Height | Aera%  |
|-------|-----------|--------|--------|--------|
| 1     | 6.581     | 492205 | 29300  | 50.971 |
| 2     | 16.553    | 473453 | 3326   | 49.029 |

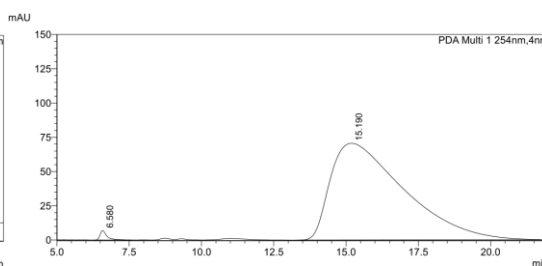

| Peak# | Ret. Time | Area     | Height | Aera%  |
|-------|-----------|----------|--------|--------|
| 1     | 6.580     | 114655   | 6885   | 0.909  |
| 2     | 15.190    | 12495940 | 70597  | 99.091 |

**(E)-1-(1-(cyclopentylsulfonyl)-3,3-dimethylbut-1-en-1-yl)-7-methoxynaphthalen-2-ol (3t)**

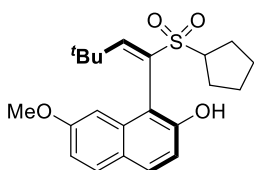

Purification by flash chromatography (petroleum ether/acetone = 4/1). White solid; 77% yield;  $[\alpha]_D^{20} = +89.0$  ( $c = 0.10$  in  $\text{CHCl}_3$ );  $^1\text{H NMR}$  (400 MHz,  $\text{CDCl}_3$ )  $\delta$  (ppm) 7.73 (dd,  $J = 19.6, 8.8$  Hz, 2H), 7.56 (s, 1H), 7.37 (s, 1H), 7.09 (d,  $J = 8.8$  Hz, 1H), 7.03 (dd,  $J = 8.8, 2.4$  Hz, 1H), 6.99 (d,  $J = 2.0$  Hz, 1H), 3.88 (s, 3H), 3.29–3.22 (m, 1H), 2.22–2.15 (m, 1H), 2.10–2.01 (m, 1H), 1.89–1.81 (m, 1H), 1.77–1.72 (m, 2H), 1.65–1.56 (m, 2H), 1.45–1.38 (m, 1H), 0.89 (s, 9H);  $^{13}\text{C NMR}$  (100 MHz,  $\text{CDCl}_3$ )  $\delta$  (ppm) 158.6, 155.9, 154.6, 135.5, 132.1, 131.6, 130.3, 124.2, 117.4, 115.8, 110.9, 103.4, 58.1, 55.2, 35.6, 29.0, 28.6, 26.4, 26.3, 26.2; HRMS (ESI) for  $\text{C}_{22}\text{H}_{28}\text{NaO}_4\text{S}^+$  calcd. 411.1601, found: 411.1606; **HPLC analysis:** CHIRALPAK ID-H (hexane/*i*-PrOH = 90/10, 0.8 mL/min,  $\lambda = 254$  nm,  $t_R = 14.409$  min (major),  $t_R = 15.312$  min (minor)).



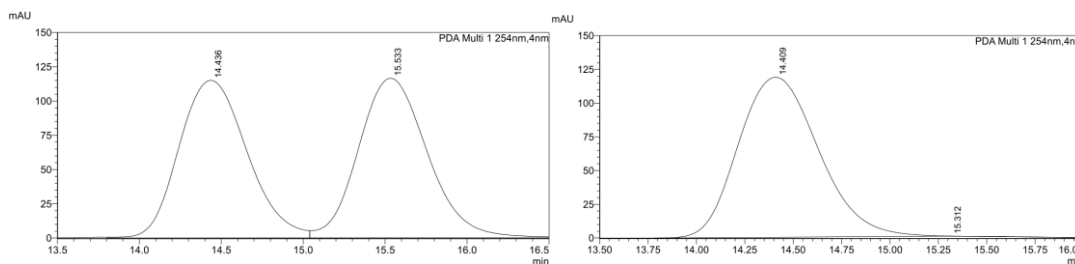

| PDA Ch1 254nm |           |         |        |        |
|---------------|-----------|---------|--------|--------|
| Peak#         | Ret. Time | Area    | Height | Aera%  |
| 1             | 14.436    | 3323894 | 115007 | 49.285 |
| 2             | 15.533    | 3420294 | 116493 | 50.715 |

| PDA Ch1 254nm |           |         |        |        |
|---------------|-----------|---------|--------|--------|
| Peak#         | Ret. Time | Area    | Height | Aera%  |
| 1             | 14.409    | 3420963 | 118619 | 99.997 |
| 2             | 15.312    | 111     | -6     | 0.003  |

**(E)-1-(1-(cyclopentylsulfonyl)-2-(dibenzo[b,d]thiophen-4-yl)vinyl)naphthalen-2-ol (3u)**

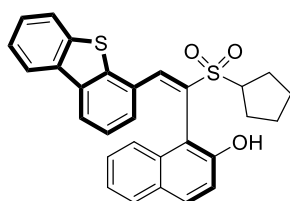

Purification by flash chromatography (petroleum ether/acetone = 4/1). White solid; 77% yield;  $[\alpha]_D^{20} = -128.8$  ( $c = 0.10$  in  $\text{CHCl}_3$ );  $^1\text{H NMR}$  (400 MHz,  $\text{CDCl}_3$ )  $\delta$  (ppm) 8.46 (s, 1H), 8.24 (s, 1H), 7.99 (d,  $J = 8.4$  Hz, 1H), 7.89–7.83

(m, 3H), 7.74–7.72 (m, 1H), 7.53–7.40 (m, 3H), 7.36 (d,  $J = 8.8$  Hz, 1H), 7.22–7.15 (m, 2H), 6.87 (t,  $J = 8.0$  Hz, 1H), 6.72 (d,  $J = 8.0$  Hz, 1H), 3.36–3.29 (m, 1H), 2.31–2.25 (m, 1H), 2.21–2.14 (m, 1H), 1.91–1.77 (m, 3H), 1.73–1.68 (m, 1H), 1.63–1.56 (m, 1H), 1.48–1.42 (m, 1H);  $^{13}\text{C NMR}$  (100 MHz,  $\text{CDCl}_3$ )  $\delta$  (ppm) 154.9, 141.5, 140.4, 138.6, 136.0, 135.4, 134.8, 132.5, 131.5, 129.4, 128.7, 127.5, 127.3, 127.3, 126.1, 124.8, 124.6, 124.0, 123.2, 122.9, 122.8, 121.8, 120.5, 111.1, 58.8, 28.6, 26.4, 26.3, 26.3; **HPLC analysis:** CHIRALPAK AD-H (hexane/*i*-PrOH = 70/30, 1.0 mL/min,  $\lambda = 254$  nm,  $t_R = 9.507$  min (minor),  $t_R = 11.813$  min (major)).<sup>[1]</sup>

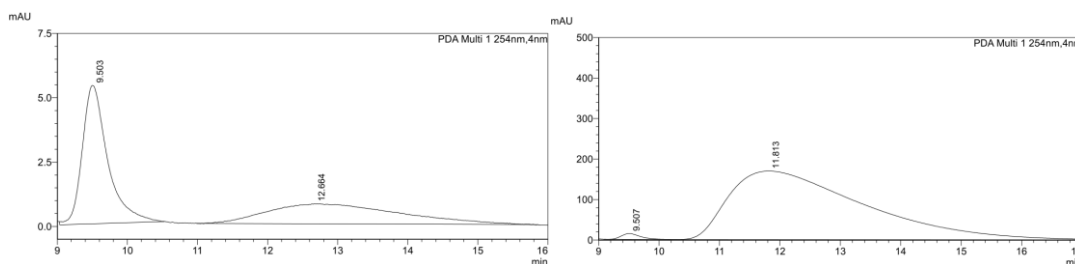

| PDA Ch1 254nm |           |        |        |        |
|---------------|-----------|--------|--------|--------|
| Peak#         | Ret. Time | Area   | Height | Aera%  |
| 1             | 9.503     | 135246 | 5379   | 56.943 |
| 2             | 12.664    | 102267 | 776    | 43.057 |

| PDA Ch1 254nm |           |          |        |        |
|---------------|-----------|----------|--------|--------|
| Peak#         | Ret. Time | Area     | Height | Aera%  |
| 1             | 9.507     | 313662   | 14219  | 1.184  |
| 2             | 11.813    | 26179735 | 169241 | 98.816 |

**(E)-1-(1-(cyclopentylsulfonyl)-2-(1-methyl-1H-indazol-5-yl)vinyl)naphthalen-2-ol (3v)**

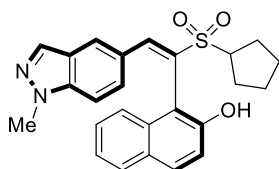

Purification by flash chromatography (petroleum ether/acetone = 2/1). White solid; 59% yield;  $[\alpha]_D^{20} = +264.0$  ( $c = 0.10$  in  $\text{CHCl}_3$ );  $^1\text{H NMR}$  (400 MHz,  $\text{CDCl}_3$ )  $\delta$  (ppm) 8.27 (s, 2H), 7.93 (d,  $J = 8.8$  Hz, 1H), 7.83–7.79 (m, 2H), 7.60–7.57 (m, 1H), 7.53 (s, 1H), 7.39 (d,  $J = 9.2$  Hz, 1H), 7.31–7.25 (m, 2H), 6.94 (d,  $J = 9.2$  Hz, 1H), 6.84 (d,  $J = 8.8$  Hz, 1H), 3.88 (s, 3H), 3.35–3.27 (m, 1H), 2.26–2.10 (m, 2H), 1.85–1.75 (m, 3H), 1.71–1.65 (m, 1H), 1.61–1.54 (m, 1H), 1.46–1.40 (m, 1H);  $^{13}\text{C NMR}$  (100 MHz,  $\text{CDCl}_3$ )  $\delta$  (ppm) 154.7, 143.9, 140.1, 134.0, 132.3, 131.8, 130.2, 129.5, 128.8, 127.4, 127.4, 125.8, 125.2, 124.0, 123.9, 123.2, 120.7, 111.4, 109.2, 58.7, 35.5, 28.6, 26.3, 26.2; **HPLC analysis:** CHIRALPAK AD-H (hexane/*i*-PrOH = 70/30, 1.0 mL/min,  $\lambda = 254$  nm,  $t_R = 9.596$  min (minor),  $t_R = 28.135$  min (major)).<sup>[1]</sup>

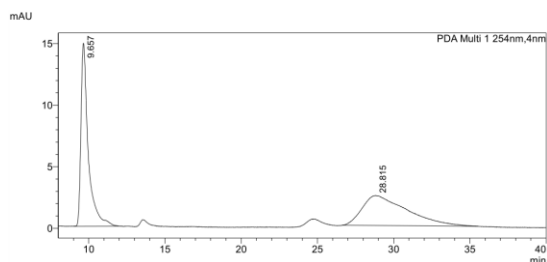

| Peak# | Ret. Time | Area   | Height | Aera%  |
|-------|-----------|--------|--------|--------|
| 1     | 9.657     | 494869 | 14866  | 49.910 |
| 2     | 28.815    | 496657 | 2438   | 50.090 |

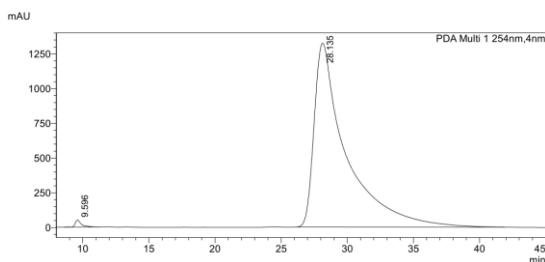

| Peak# | Ret. Time | Area      | Height  | Aera%  |
|-------|-----------|-----------|---------|--------|
| 1     | 9.596     | 1741460   | 52027   | 0.775  |
| 2     | 28.135    | 223010574 | 1323271 | 99.225 |

**(E)-1-(1-(cyclopentylsulfonyl)-2-(quinolin-6-yl)vinyl)naphthalen-2-ol (3w)**

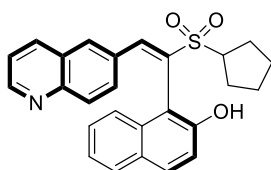

Purification by flash chromatography (petroleum ether/acetone = 4/1). White solid; 87% yield;  $[\alpha]_D^{20} = +205.6$  ( $c = 0.10$  in  $\text{CHCl}_3$ );  $^1\text{H NMR}$  (400 MHz,  $\text{CDCl}_3$ )  $\delta$  (ppm) 9.24 (s, 1H), 8.80 (d,  $J = 2.8$  Hz, 1H), 8.28 (s, 1H), 7.90 (t,  $J = 5.6$  Hz, 2H), 7.80–7.77 (m, 1H), 7.67–7.61 (m, 3H), 7.37 (d,  $J = 8.8$  Hz, 1H), 7.32–7.26 (m, 3H), 7.17 (dd,  $J = 9.2, 1.6$  Hz, 1H), 3.49–3.41 (m, 1H), 2.25–2.11 (m, 2H), 1.88–1.75 (m, 4H), 1.62–1.53 (m, 1H), 1.50–1.41 (m, 1H);  $^{13}\text{C NMR}$  (100 MHz,  $\text{CDCl}_3$ )  $\delta$  (ppm) 154.5, 151.3, 147.9, 142.0, 137.2, 135.0, 132.5, 132.4, 131.8, 131.3, 129.4, 129.3, 129.1, 128.7, 127.8, 127.5, 124.0, 123.5, 121.7, 120.0, 111.0, 59.3, 27.9, 27.0, 26.3, 26.2; HRMS (ESI) for  $\text{C}_{26}\text{H}_{24}\text{NO}_3\text{S}^+$

calcd. 430.1471, found: 430.1484; **HPLC analysis:** CHIRALPAK AD-H (hexane/*i*-PrOH = 70/30, 1.0 mL/min,  $\lambda$  = 254 nm,  $t_R$  = 7.193 min (minor),  $t_R$  = 32.681 min (major).

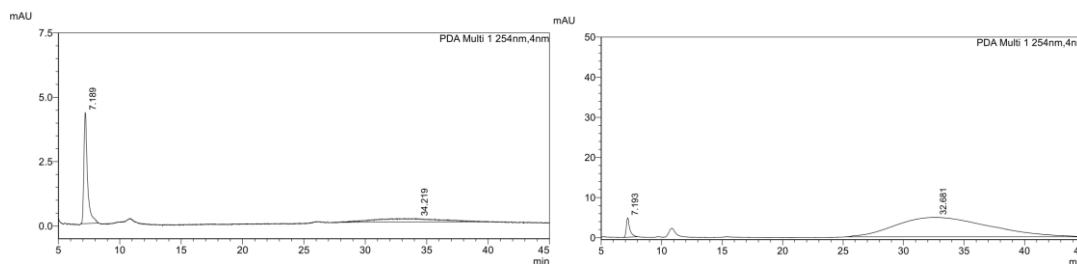

| PDA Ch1 254nm |           |       |        |        |
|---------------|-----------|-------|--------|--------|
| Peak#         | Ret. Time | Area  | Height | Aera%  |
| 1             | 7.189     | 87629 | 4312   | 62.332 |
| 2             | 34.219    | 52956 | 137    | 37.668 |

| PDA Ch1 254nm |           |         |        |        |
|---------------|-----------|---------|--------|--------|
| Peak#         | Ret. Time | Area    | Height | Aera%  |
| 1             | 7.193     | 96151   | 4793   | 3.549  |
| 2             | 32.681    | 2613110 | 4846   | 96.451 |

***(E)*-1-(2-(4-chloro-3-(4-ethoxybenzyl)phenyl)-1-(cyclopentylsulfonyl)vinyl)naphthalen-2-ol (3x)**

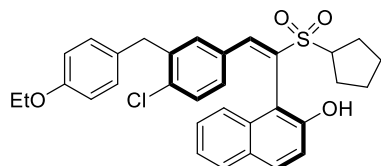

Purification by flash chromatography (petroleum ether/acetone = 4/1). White solid; 55% yield;  $[\alpha]_D^{20}$  = +78.2 ( $c$  = 0.10 in  $\text{CHCl}_3$ );  **$^1\text{H NMR}$  (400 MHz,  $\text{CDCl}_3$ )**

$\delta$  (ppm) 8.11 (s, 1H), 8.06 (s, 1H), 7.88 (d,  $J$  = 8.8 Hz, 1H), 7.81 (d,  $J$  = 7.6 Hz, 1H), 7.51 (d,  $J$  = 8.4 Hz, 1H), 7.37–7.30 (m, 3H), 7.05 (d,  $J$  = 8.4 Hz, 1H), 6.80–6.76 (m, 2H), 6.69 (d,  $J$  = 8.8 Hz, 2H), 6.59 (d,  $J$  = 8.4 Hz, 2H), 4.01 (q,  $J$  = 7.2 Hz, 2H), 3.71 (d,  $J$  = 15.2 Hz, 1H), 3.56 (d,  $J$  = 15.2 Hz, 1H), 3.31–3.23 (m, 1H), 2.19–2.07 (m, 2H), 1.83–1.62 (m, 5H), 1.62–1.54 (m, 1H), 1.42 (t,  $J$  = 6.8 Hz, 3H);  **$^{13}\text{C NMR}$  (100 MHz,  $\text{CDCl}_3$ )**  $\delta$  (ppm) 157.4, 154.5, 142.2, 139.6, 136.8, 133.0, 132.5, 131.4, 131.0, 130.3, 129.9, 129.7, 129.4, 129.0, 127.6, 124.1, 122.9, 120.7, 114.4, 110.8, 63.4, 58.6, 38.3, 28.6, 26.3, 26.2, 26.2; **HPLC analysis:** CHIRALPAK AD-H (hexane/*i*-PrOH = 70/30, 1.0 mL/min,  $\lambda$  = 254 nm,  $t_R$  = 6.432 min (minor),  $t_R$  = 11.191 min (major)).<sup>[1]</sup>

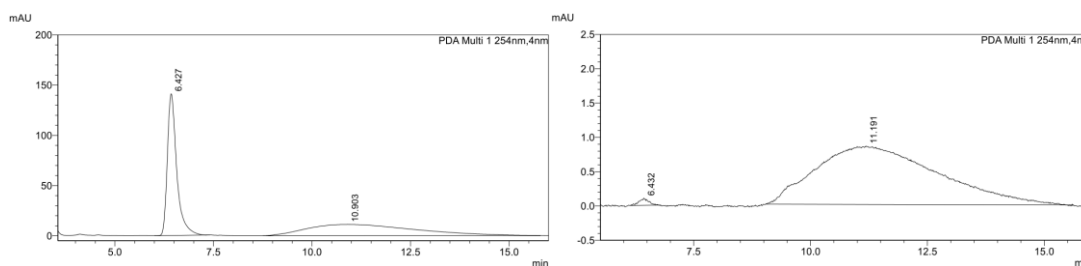

| PDA Ch1 254nm |           |         |        |        |
|---------------|-----------|---------|--------|--------|
| Peak#         | Ret. Time | Area    | Height | Aera%  |
| 1             | 6.427     | 2342070 | 141047 | 51.850 |
| 2             | 10.903    | 2174916 | 11362  | 48.150 |

| PDA Ch1 254nm |           |        |        |        |
|---------------|-----------|--------|--------|--------|
| Peak#         | Ret. Time | Area   | Height | Aera%  |
| 1             | 6.432     | 1459   | 104    | 0.937  |
| 2             | 11.191    | 154261 | 848    | 99.063 |

**(E)-1-(1-(cyclopentylsulfonyl)-2-phenylvinyl)-7-methoxynaphthalen-2-ol (3y)**

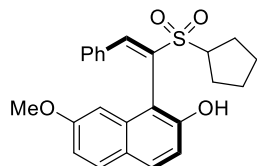

Purification by flash chromatography (petroleum ether/acetone = 4/1). White solid; 74% yield;  $[\alpha]_D^{20} = +362.1$  ( $c = 0.10$  in  $\text{CHCl}_3$ );

$^1\text{H NMR}$  (400 MHz,  $\text{CDCl}_3$ )  $\delta$  (ppm) 8.17 (s, 1H), 8.07 (s, 1H), 7.81 (d,  $J = 9.2$  Hz, 1H), 7.69 (d,  $J = 8.8$  Hz, 1H), 7.20–7.17 (m, 2H), 7.07 (t,  $J = 8.0$  Hz, 2H), 7.01 (d,  $J = 7.6$  Hz, 2H), 6.95 (dd,  $J = 8.8, 2.4$  Hz, 1H), 6.85 (d,  $J = 2.4$  Hz, 1H), 3.63 (s, 3H), 3.36–3.29 (m, 1H), 2.23–2.11 (m, 2H), 1.85–1.71 (m, 4H), 1.62–1.54 (m, 1H), 1.50–1.44 (m, 1H);  $^{13}\text{C NMR}$  (100 MHz,  $\text{CDCl}_3$ )  $\delta$  (ppm) 158.9, 155.1, 143.4, 133.1, 133.0, 132.4, 132.1, 130.8, 130.3, 130.2, 128.7, 124.7, 118.0, 116.0, 110.2, 102.6, 58.5, 55.1, 28.7, 26.3, 26.3, 26.2; **HPLC analysis:** CHIRALPAK AD-H (hexane/*i*-PrOH = 70/30, 1.0 mL/min,  $\lambda = 254$  nm,  $t_R = 4.912$  min (minor),  $t_R = 6.472$  min (major).

[1]

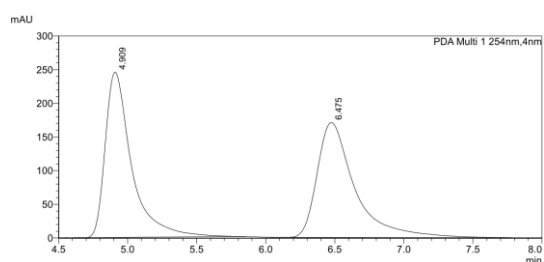

| PDA Ch1 254nm |           |         |        |        |
|---------------|-----------|---------|--------|--------|
| Peak#         | Ret. Time | Area    | Height | Aera%  |
| 1             | 4.909     | 3261208 | 245808 | 50.182 |
| 2             | 6.475     | 3237603 | 170896 | 49.818 |

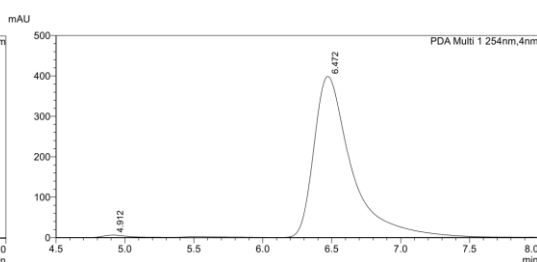

| PDA Ch1 254nm |           |         |        |        |
|---------------|-----------|---------|--------|--------|
| Peak#         | Ret. Time | Area    | Height | Aera%  |
| 1             | 4.912     | 68755   | 5792   | 0.898  |
| 2             | 6.472     | 7589091 | 398364 | 99.102 |

**Dimethyl (E)-2-(3-(cyclopentylsulfonyl)-3-(2-hydroxynaphthalen-1-yl)allyl)malonate (3z)**

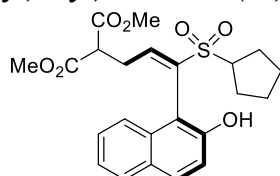

Purification by flash chromatography (petroleum ether/acetone = 2/1). White solid; 77% yield;  $[\alpha]_D^{20} = +129.8$  ( $c = 0.10$  in  $\text{CHCl}_3$ );

$^1\text{H NMR}$  (400 MHz,  $\text{CDCl}_3$ )  $\delta$  (ppm) 7.84 (t,  $J = 9.6$  Hz, 3H), 7.59 (d,  $J = 8.4$  Hz, 1H), 7.49 (t,  $J = 6.8$  Hz, 1H), 7.41–7.38 (m, 2H), 7.27–7.25 (m, 1H), 3.71 (s, 6H), 3.54 (t,  $J = 6.8$  Hz, 1H), 3.27 (s, 1H), 2.58–2.53 (m, 1H), 2.41–2.35 (m, 1H), 2.14–2.06 (m, 2H), 1.83–1.74 (m, 4H), 1.57 (d,  $J = 5.6$  Hz, 1H),

1.46 (d,  $J = 4.0$  Hz, 1H);  $^{13}\text{C}$  NMR (100 MHz,  $\text{CDCl}_3$ )  $\delta$  (ppm) 168.6, 168.6, 153.8, 144.8, 137.3, 132.5, 132.2, 129.2, 128.9, 127.6, 124.0, 123.1, 120.1, 109.8, 59.2, 53.0, 53.0, 49.7, 28.5, 27.9, 26.5, 26.3, 26.2; HRMS (ESI) for  $\text{C}_{23}\text{H}_{26}\text{NaO}_7\text{S}^+$  calcd. 469.1291, found: 469.1301; HPLC analysis: CHIRALPAK AD-H (hexane/*i*-PrOH = 70/30, 1.0 mL/min,  $\lambda = 254$  nm,  $t_{\text{R}} = 8.638$  min (minor),  $t_{\text{R}} = 16.193$  min (major)).

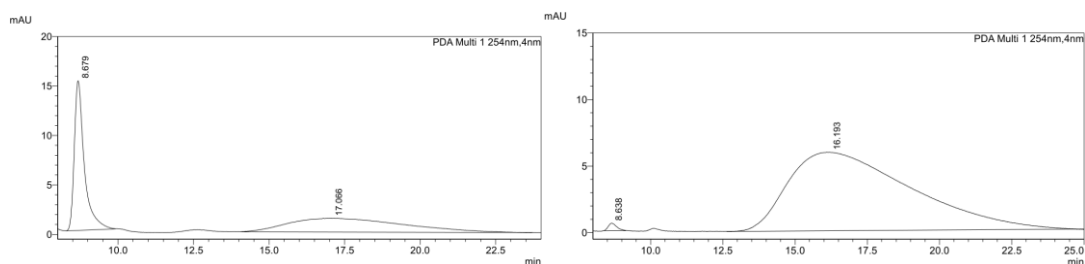

PDA Ch1 254nm

| Peak# | Ret. Time | Area   | Height | Aera%  |
|-------|-----------|--------|--------|--------|
| 1     | 8.679     | 349458 | 15136  | 48.659 |
| 2     | 17.066    | 368724 | 1393   | 51.341 |

PDA Ch1 254nm

| Peak# | Ret. Time | Area    | Height | Aera%  |
|-------|-----------|---------|--------|--------|
| 1     | 8.638     | 11552   | 569    | 0.657  |
| 2     | 16.193    | 1747869 | 5899   | 99.343 |

## 4. References

[1] C. Zhang, Z. Tang, Y. Qiu, J. Tang, S. Ye, Z. Li and J. Wu, *Chem Catal.*, 2022, **2**, 164-177.

## 5. NMR spectra of compounds

*(E)*-1-(1-(cyclohexylsulfonyl)-2-phenylvinyl)naphthalen-2-ol (**3a**)

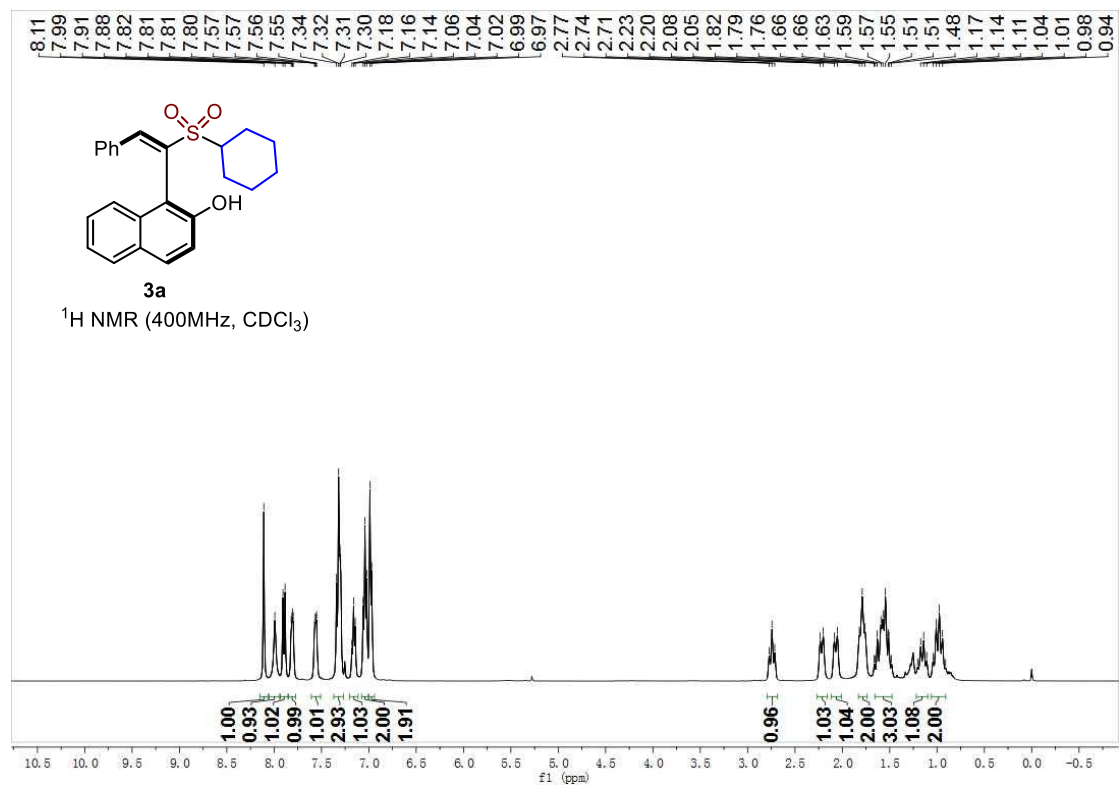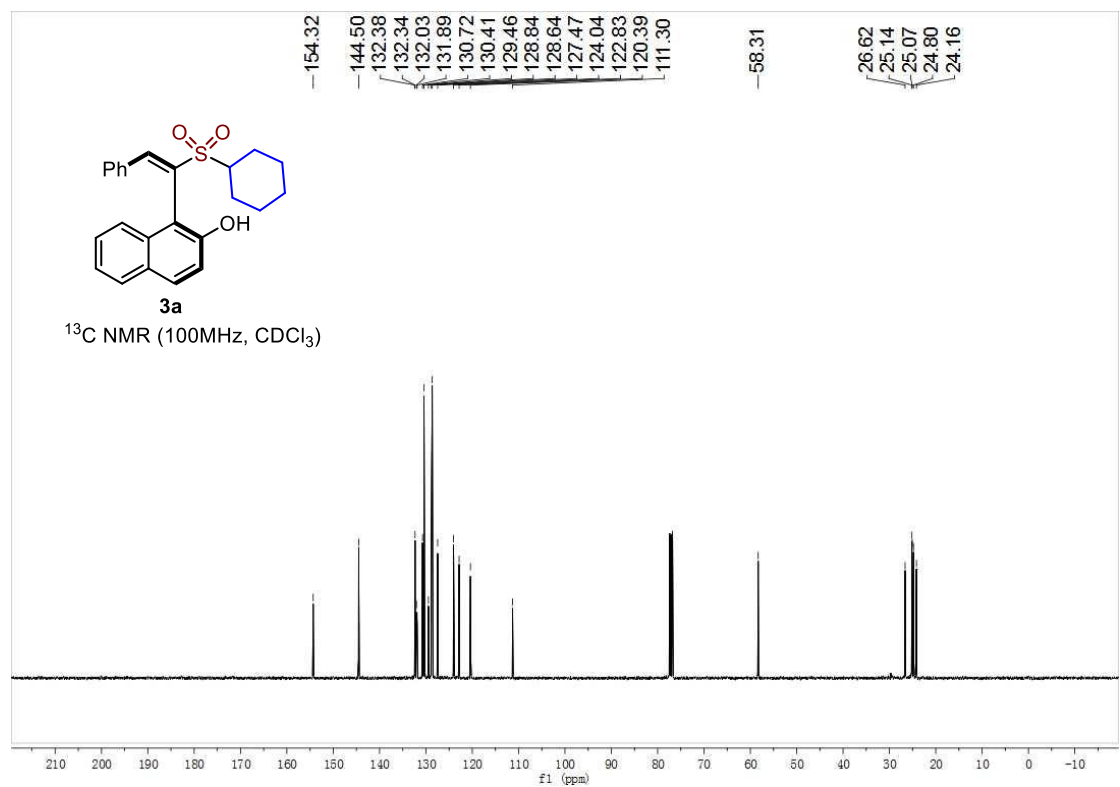

**(E)-1-(1-(3-pentylsulfonyl)-2-phenylvinyl)naphthalen-2-ol (3b)**

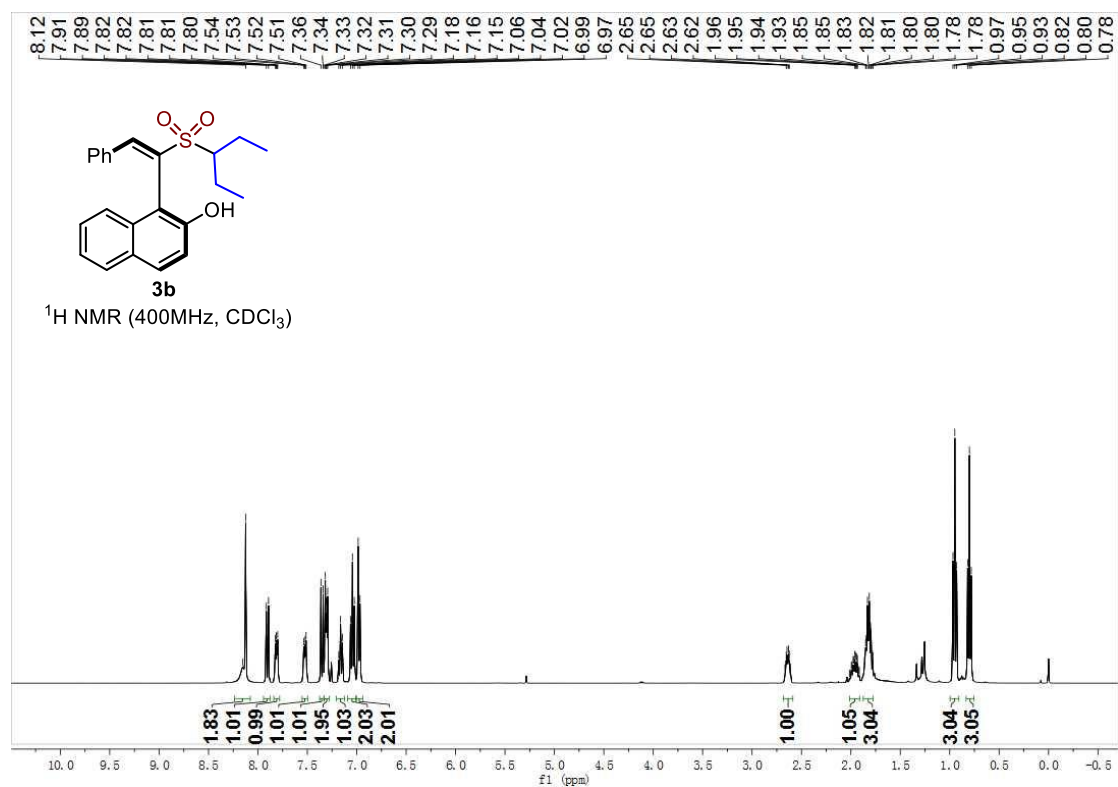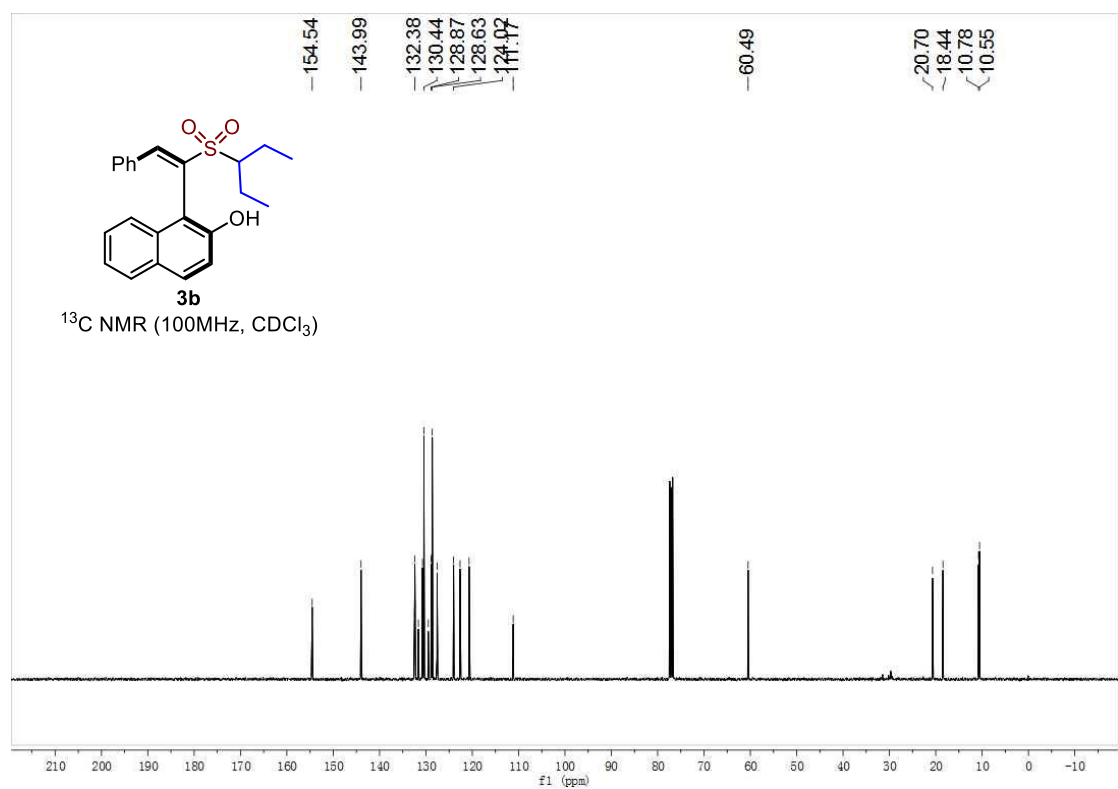

*(E)*-1-(1-(isopropylsulfonyl)-2-phenylvinyl)naphthalen-2-ol (**3c**)

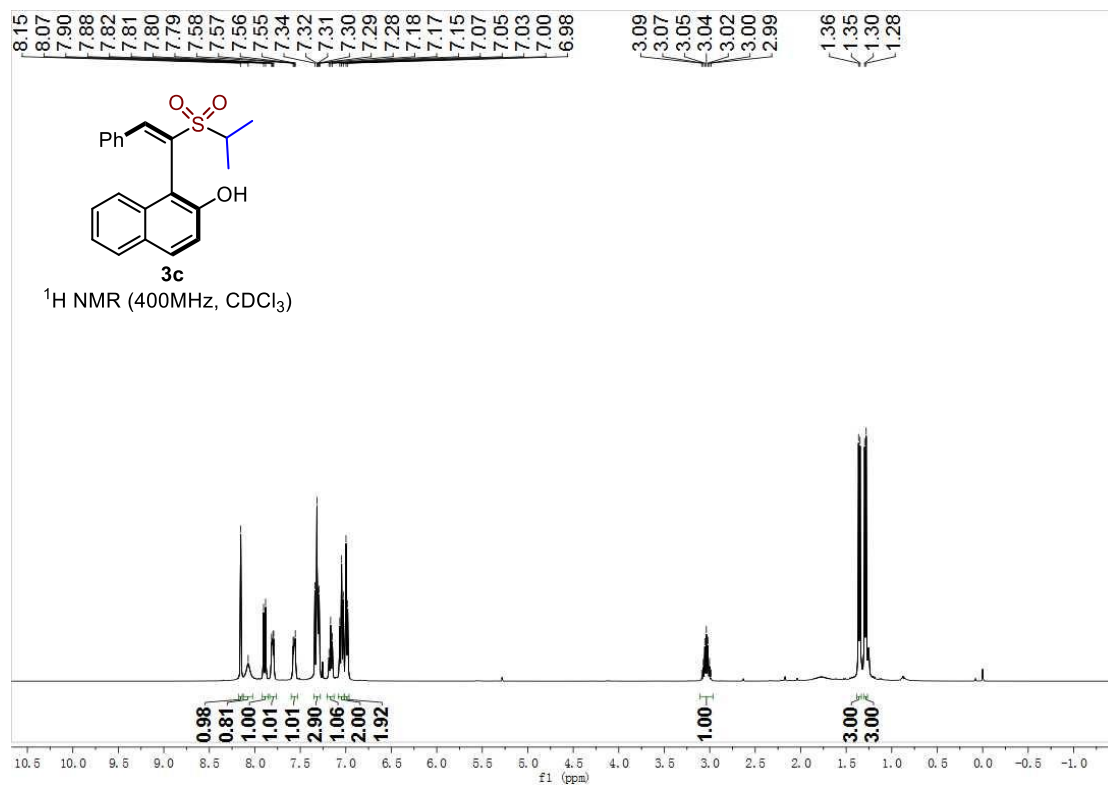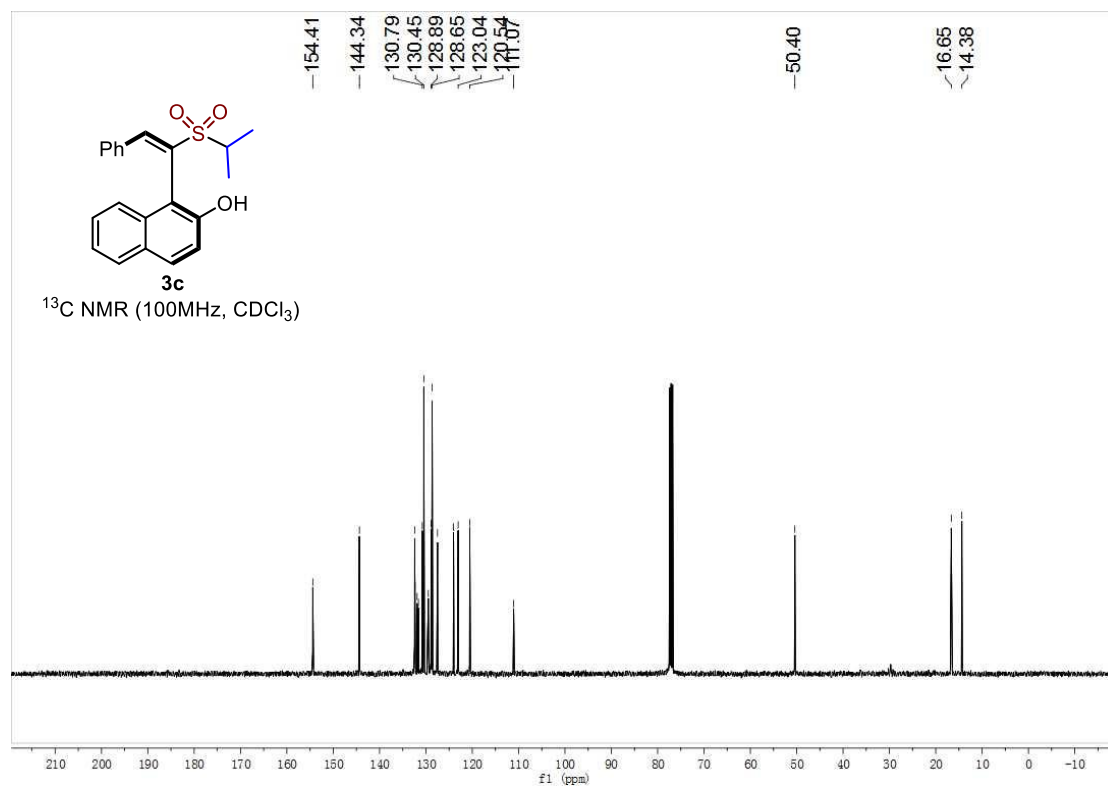

*(E)*-1-(2-phenyl-1-((tetrahydro-2H-pyran-4-yl)sulfonyl)vinyl)naphthalen-2-ol (**3d**)



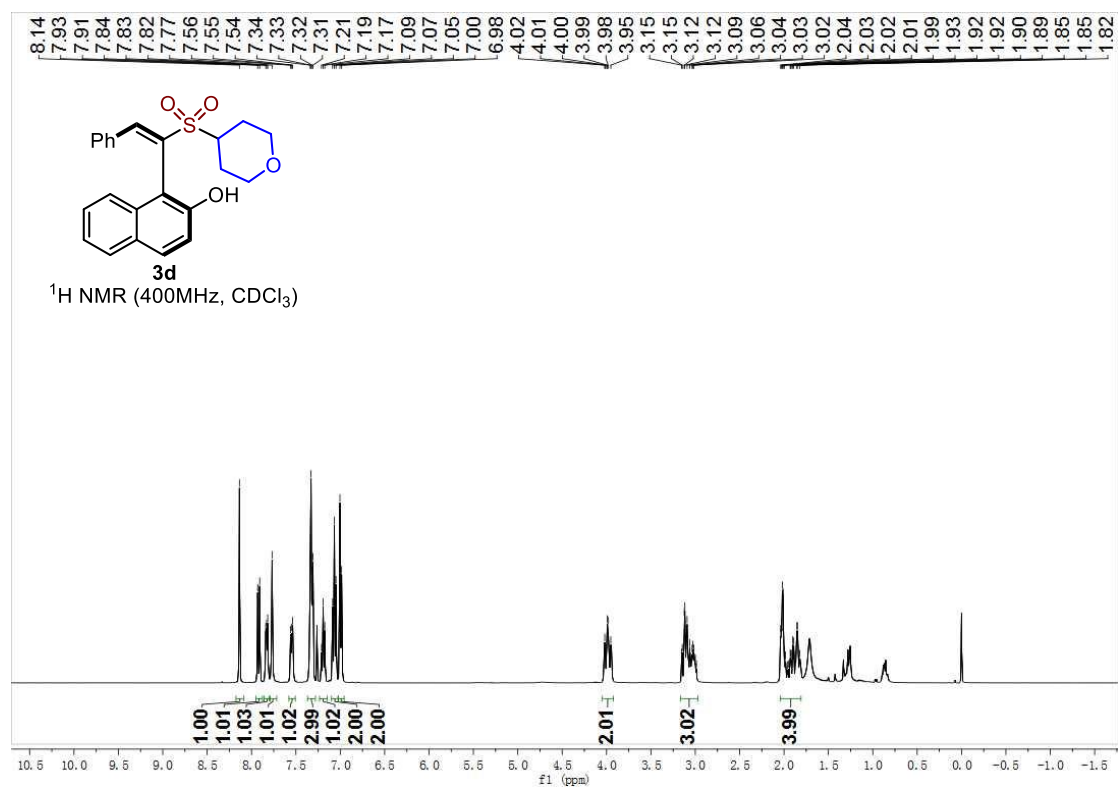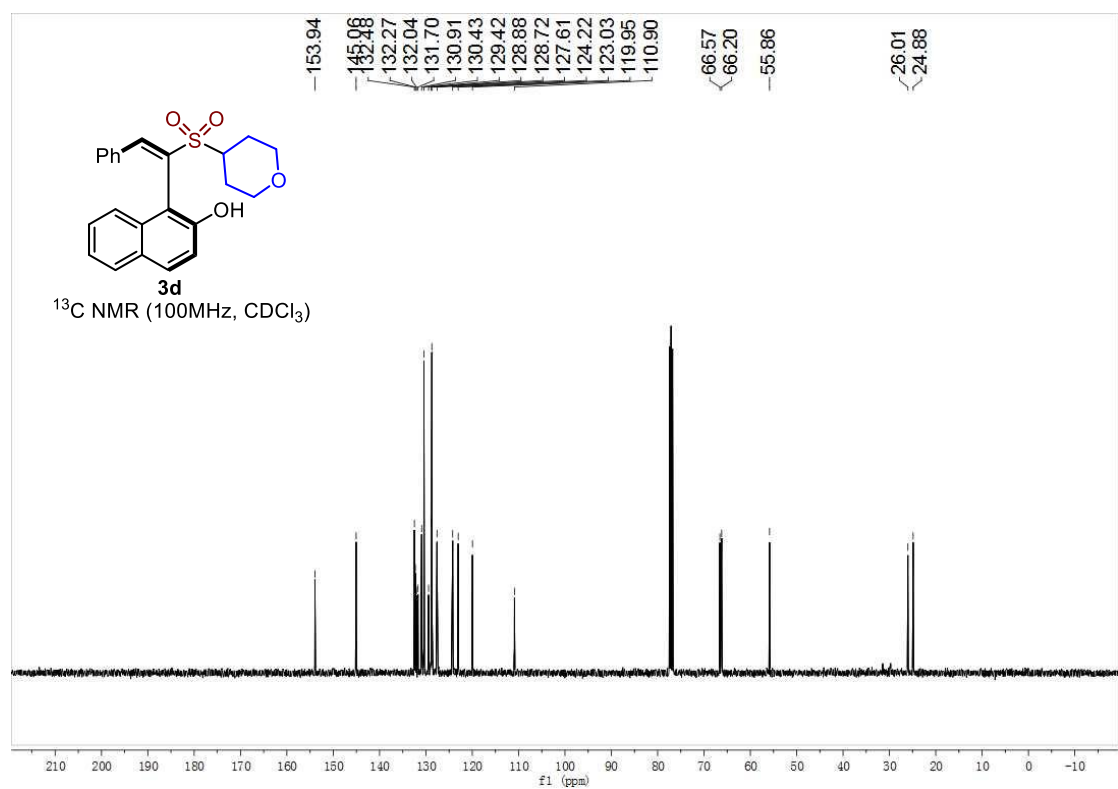

*(E)*-1-(1-(cyclopentylsulfonyl)-2-phenylvinyl)naphthalen-2-ol (**3e**)

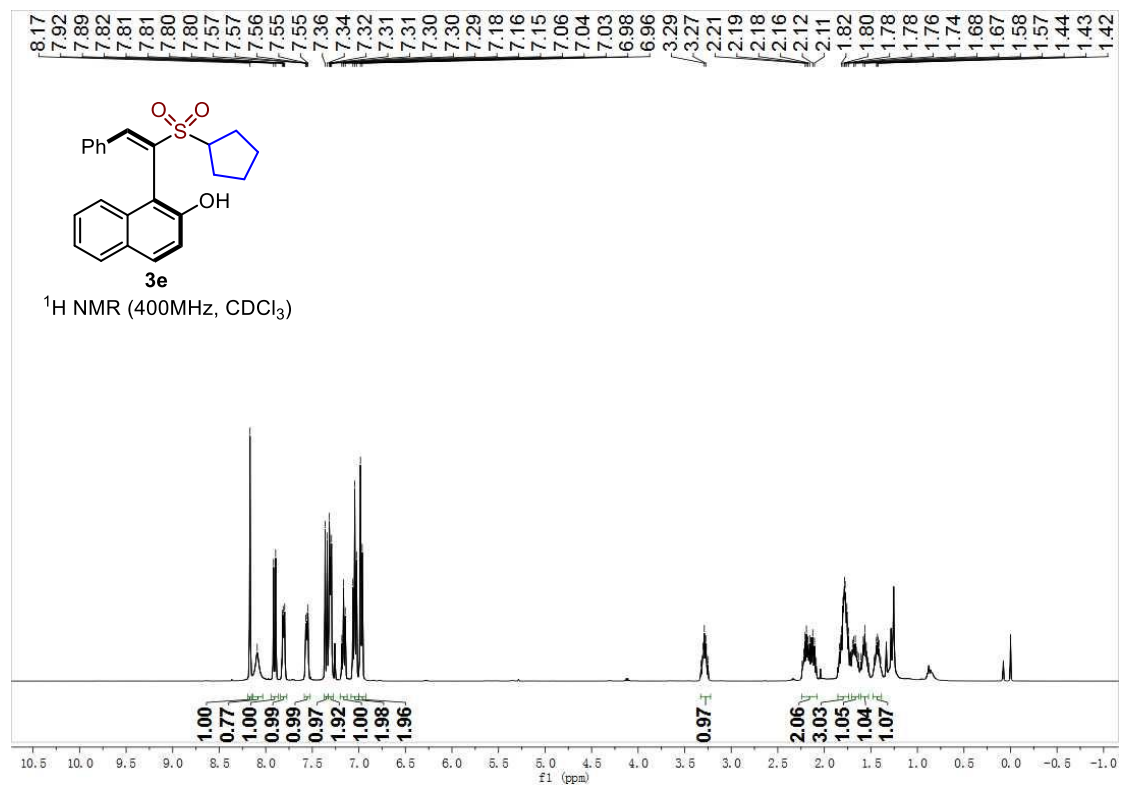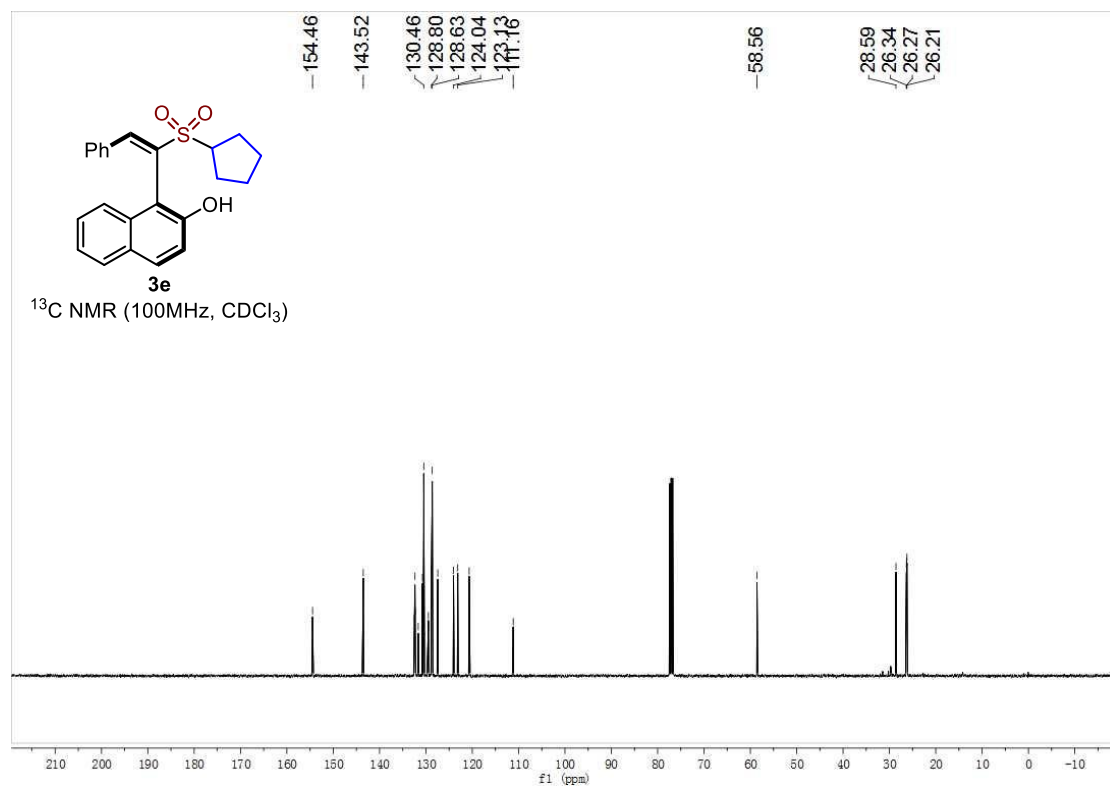

*(E)*-1-(1-(cyclopentylsulfonyl)-2-(4-methoxyphenyl)vinyl)naphthalen-2-ol (**3f**)

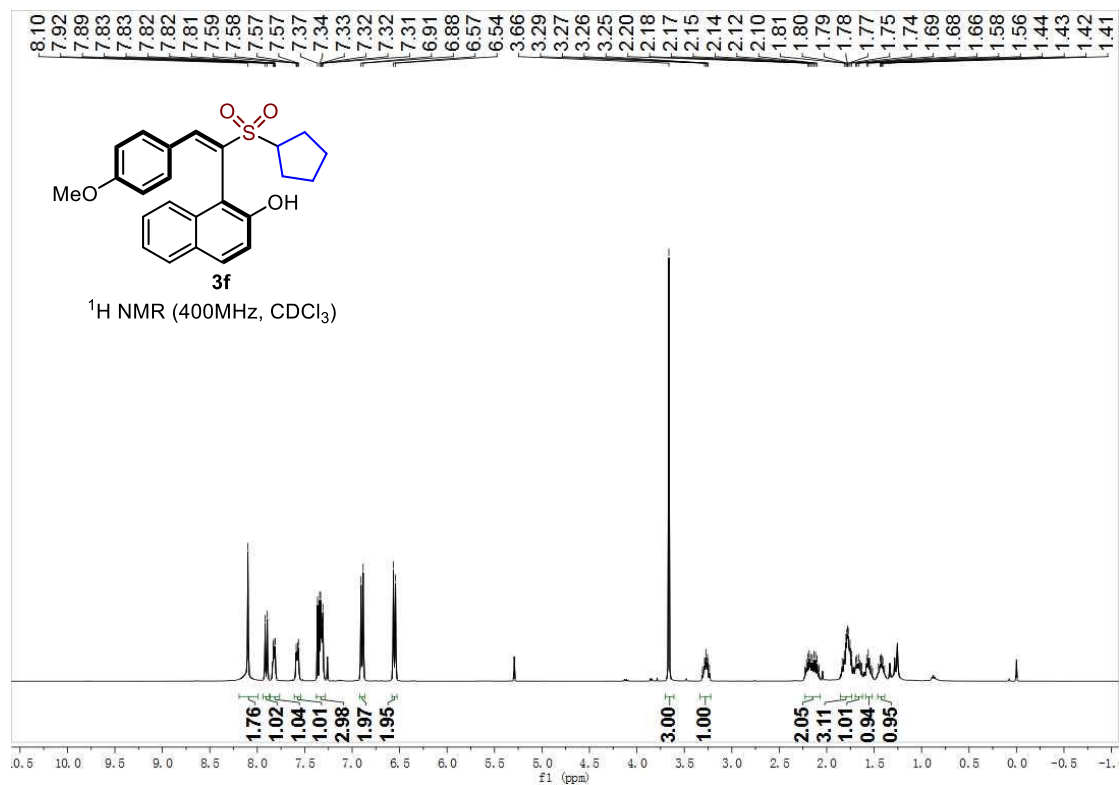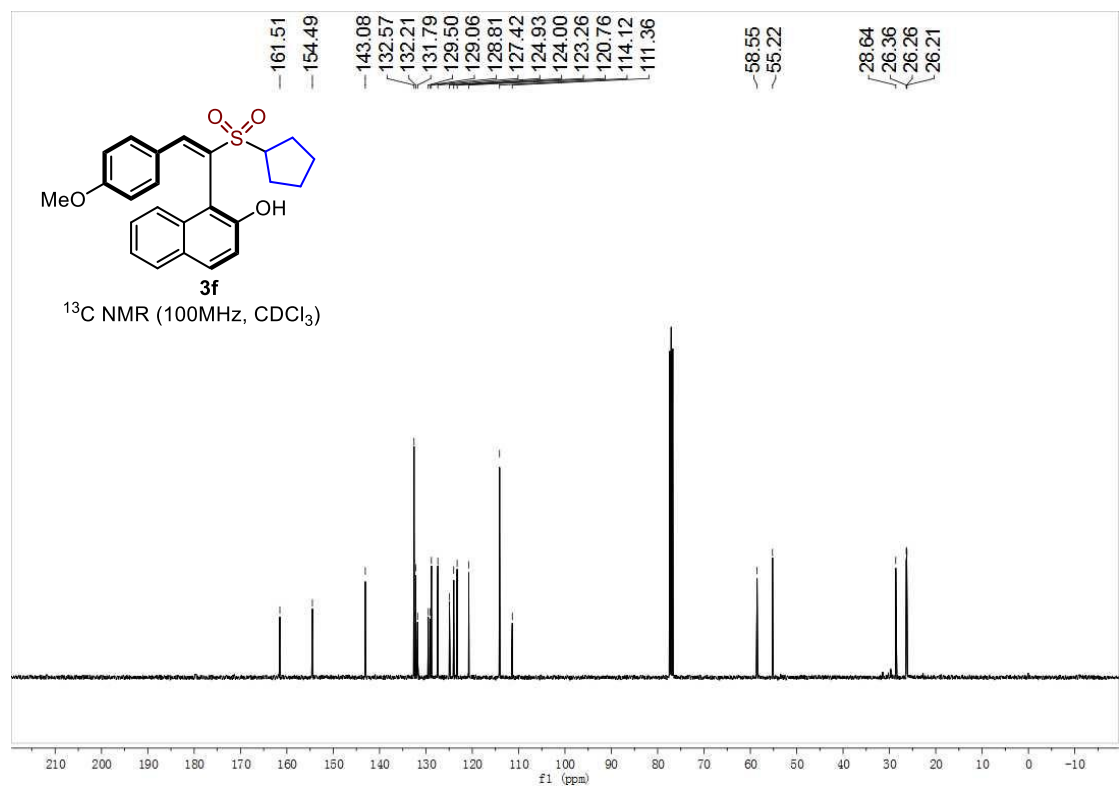

*(E)*-1-(2-(4-butylphenyl)-1-(cyclopentylsulfonyl)vinyl)naphthalen-2-ol (**3g**)

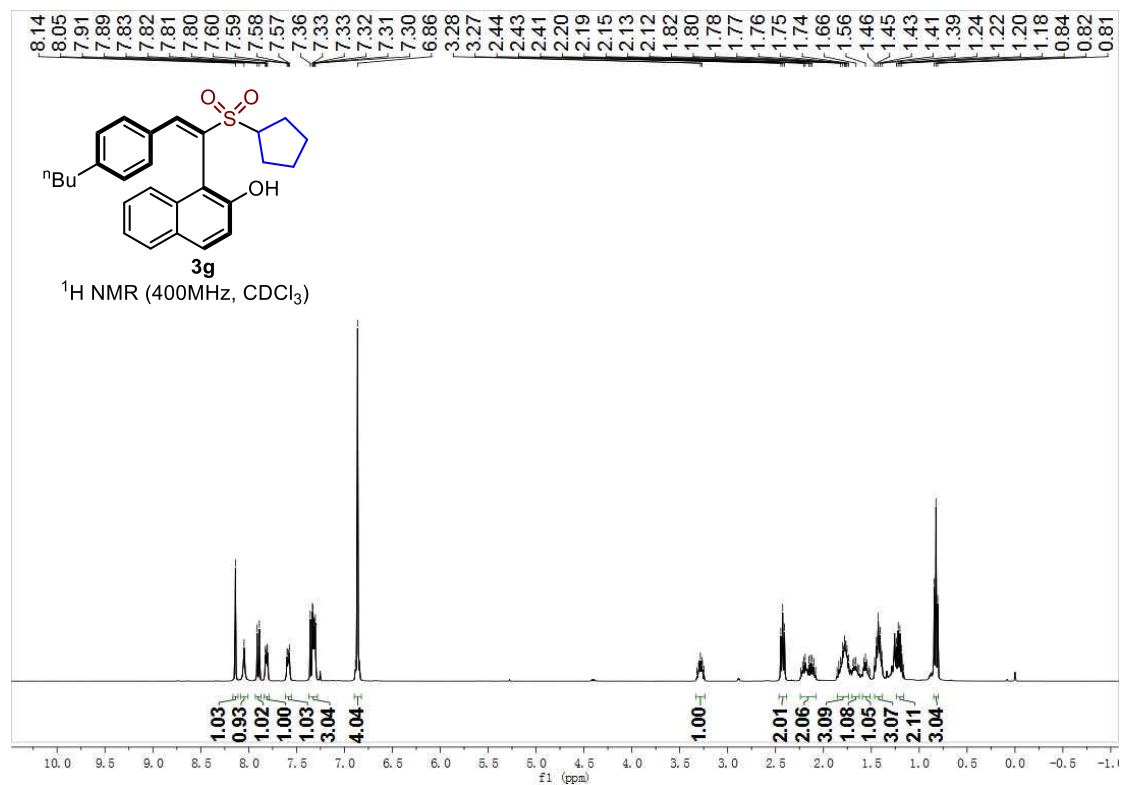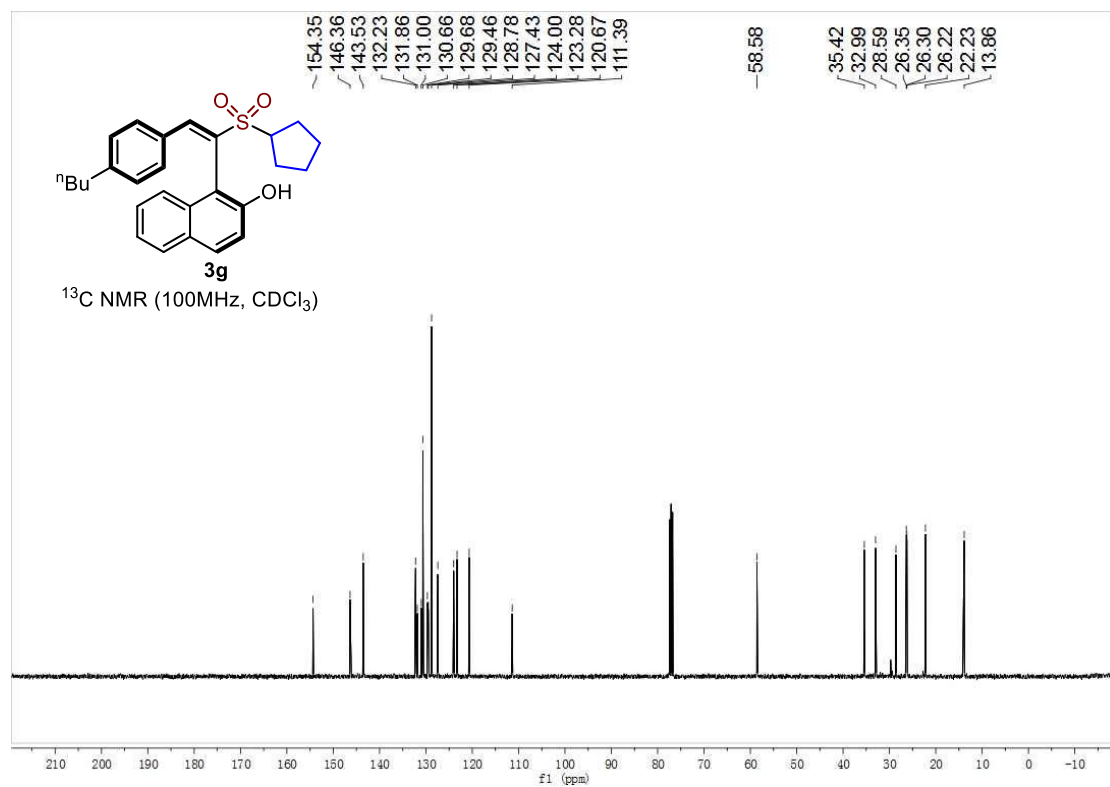

*(E)*-1-(2-(4-(*tert*-butyl)phenyl)-1-(cyclopentylsulfonyl)vinyl)naphthalen-2-ol (**3h**)

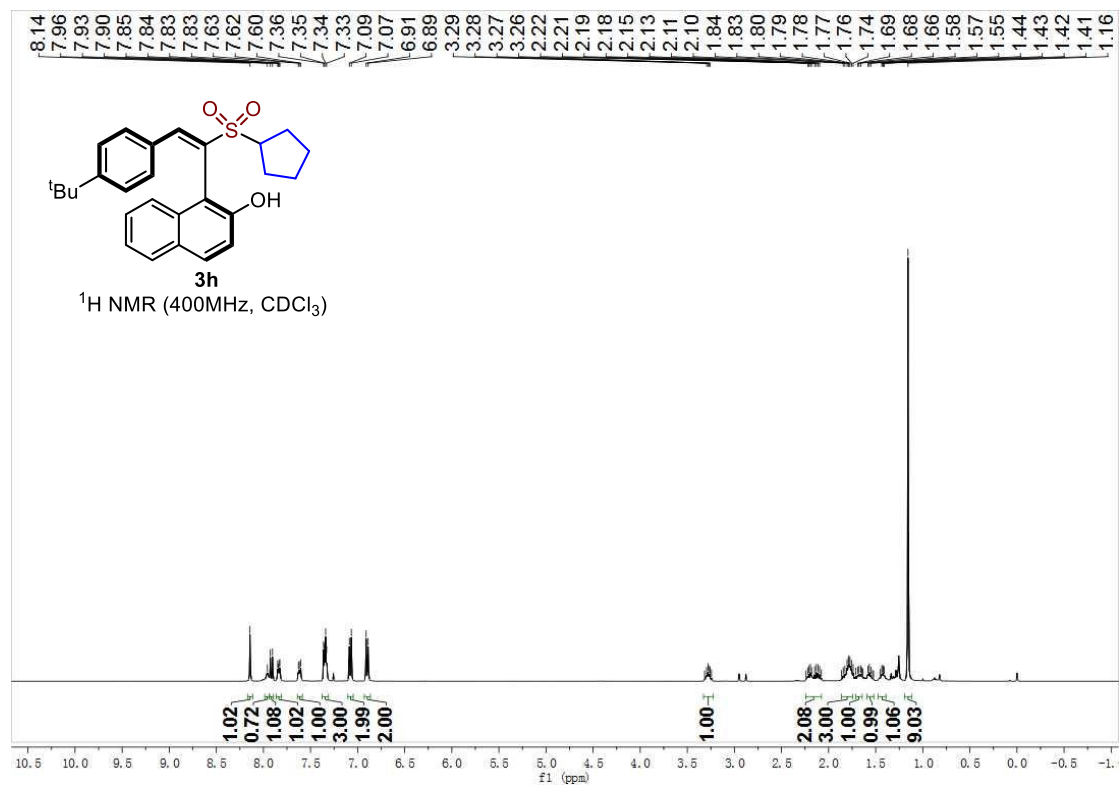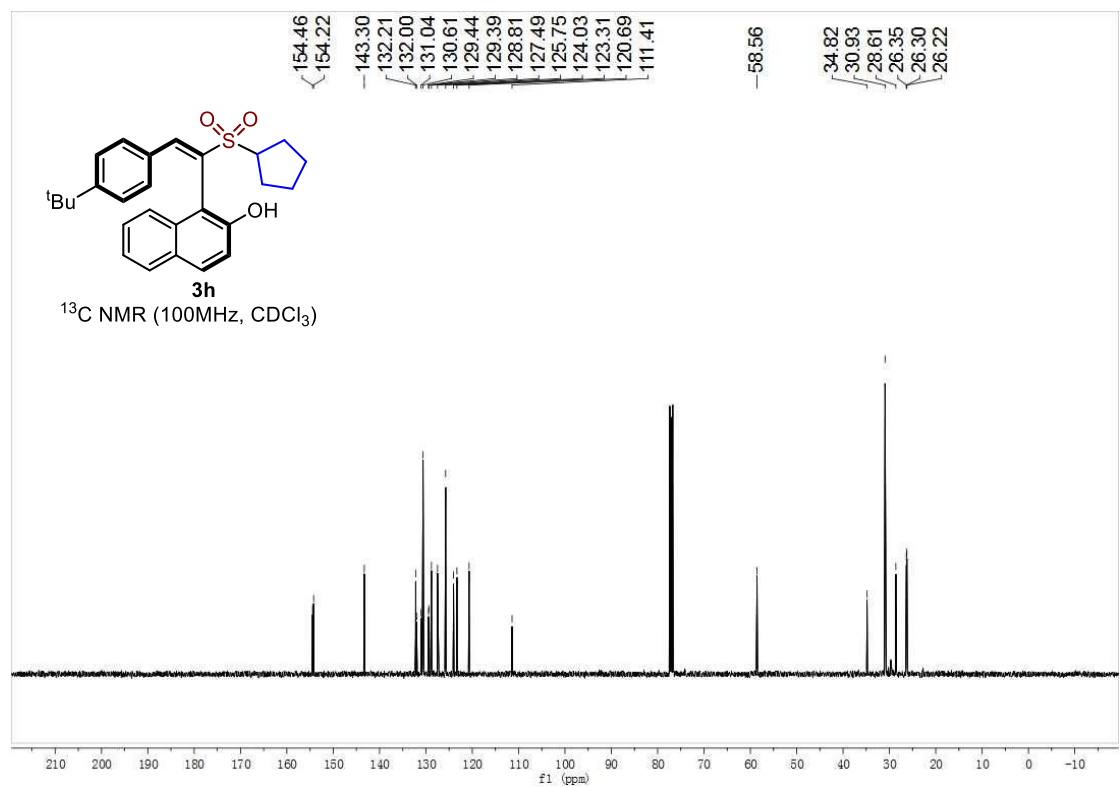

*(E)*-1-(1-(cyclopentylsulfonyl)-2-(4-fluorophenyl)vinyl)naphthalen-2-ol (**3i**)

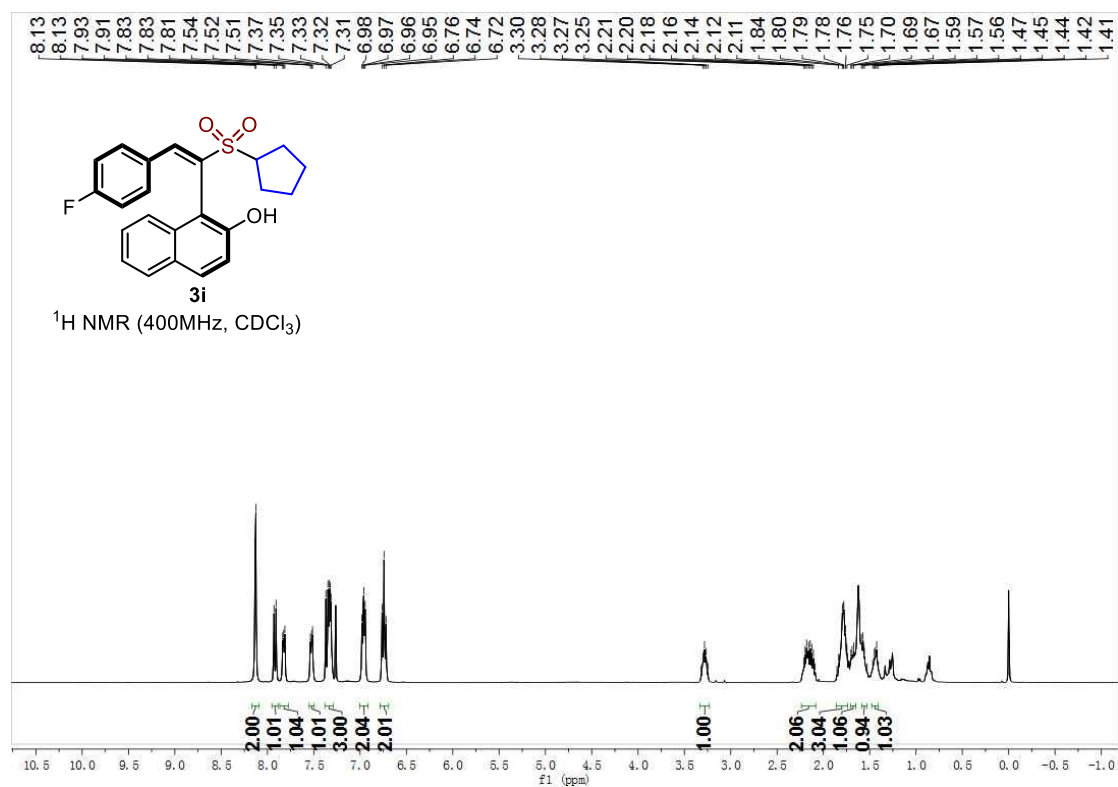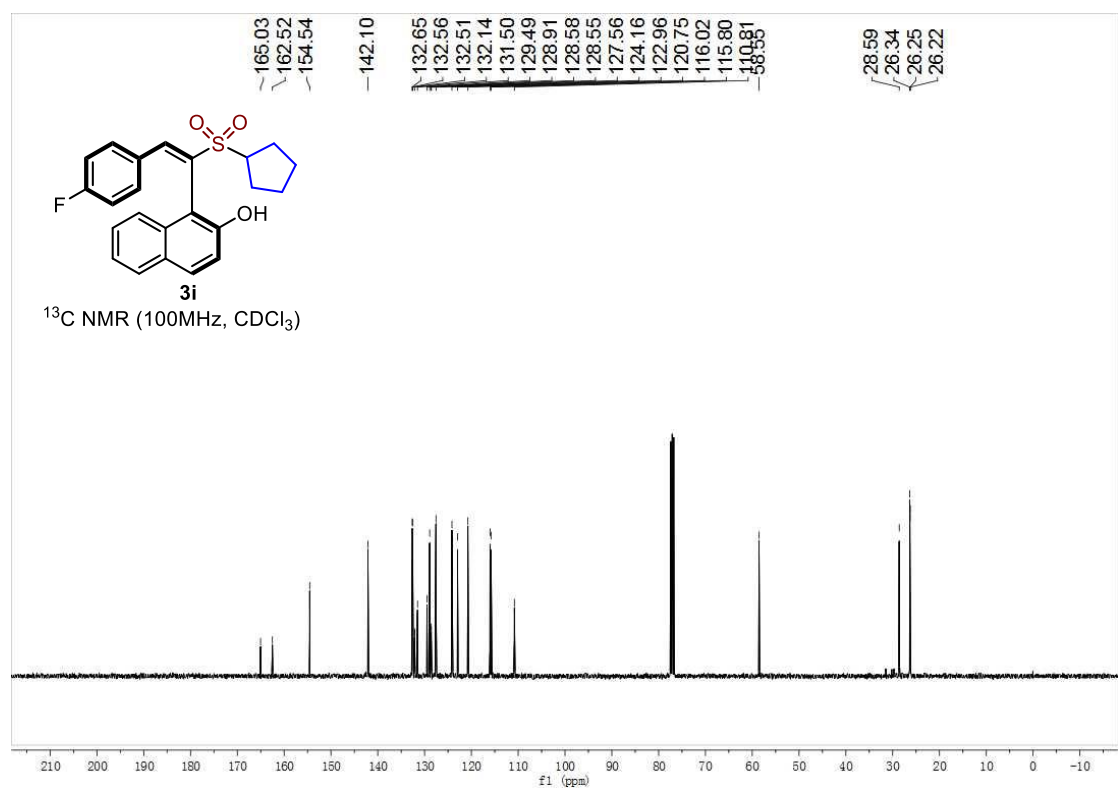

***(E)*-1-(2-(4-chlorophenyl)-1-(cyclopentylsulfonyl)vinyl)naphthalen-2-ol (3j)**

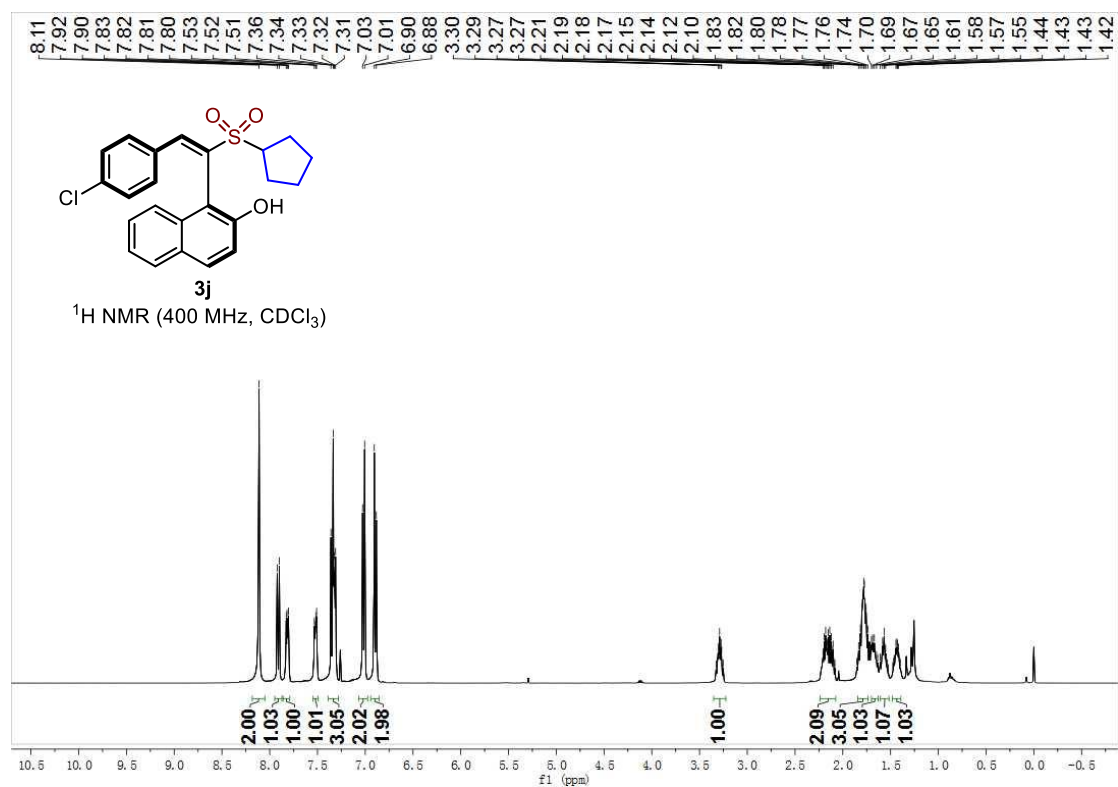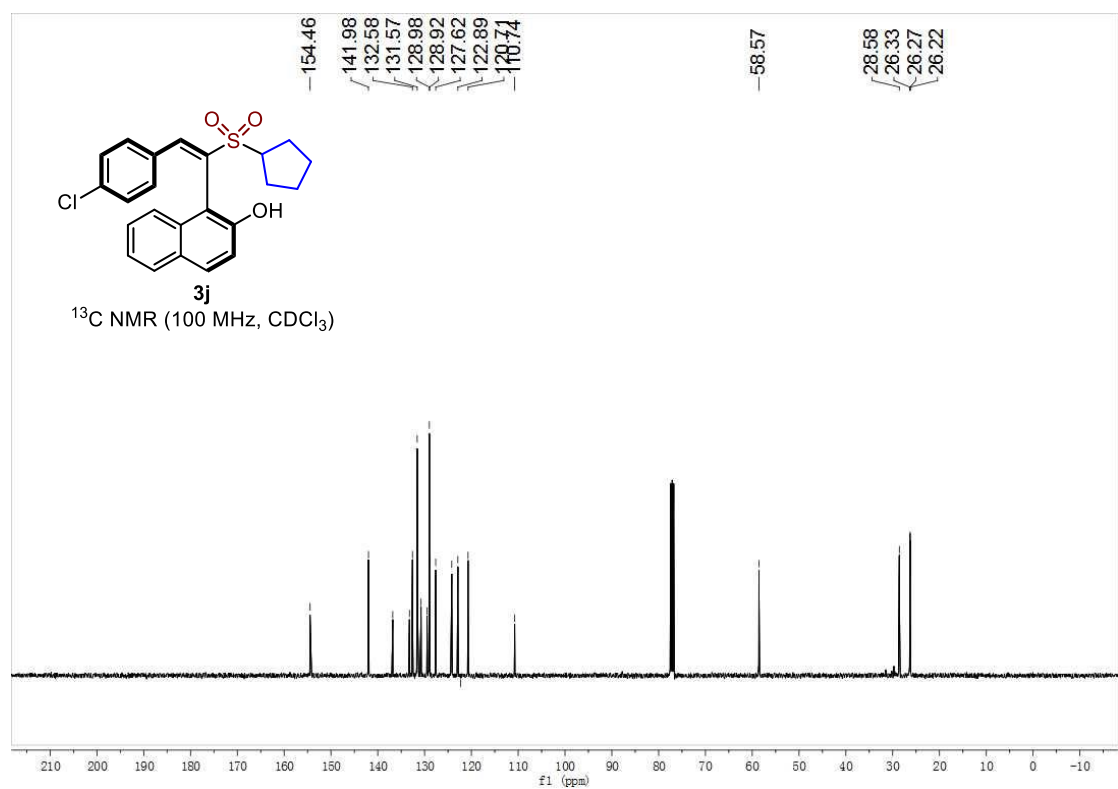

*(E)*-1-(2-(4-bromophenyl)-1-(cyclopentylsulfonyl)vinyl)naphthalen-2-ol (**3k**)

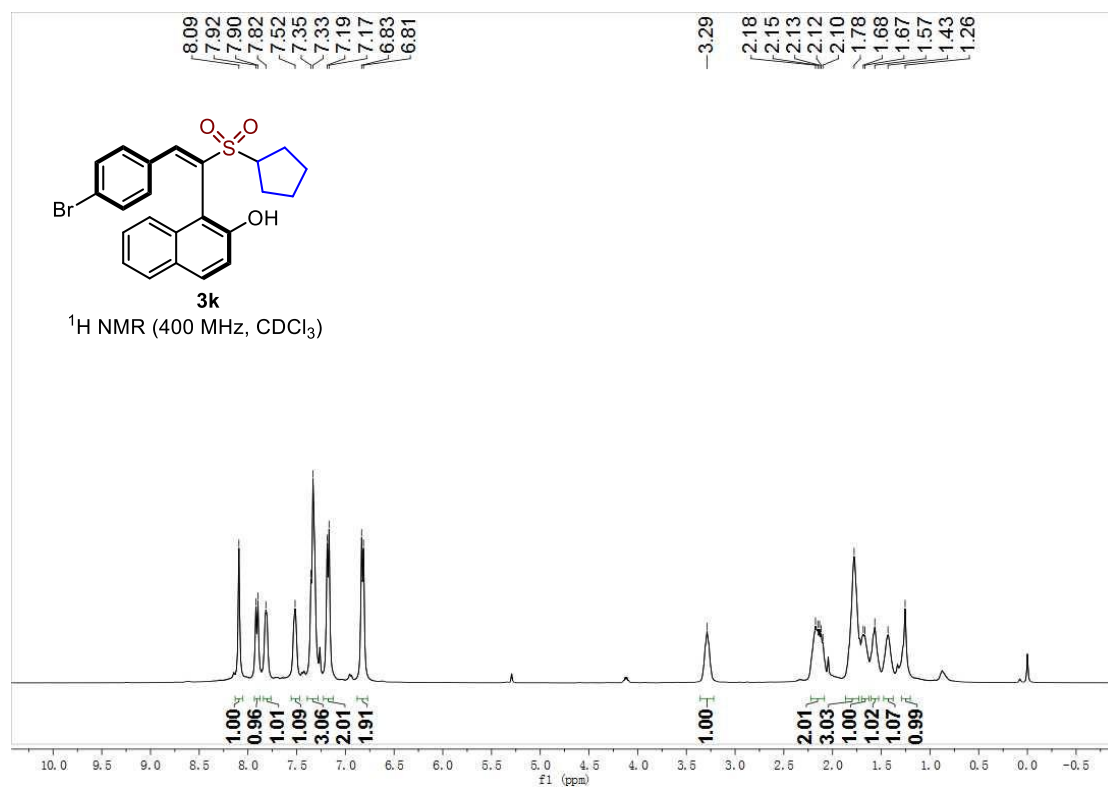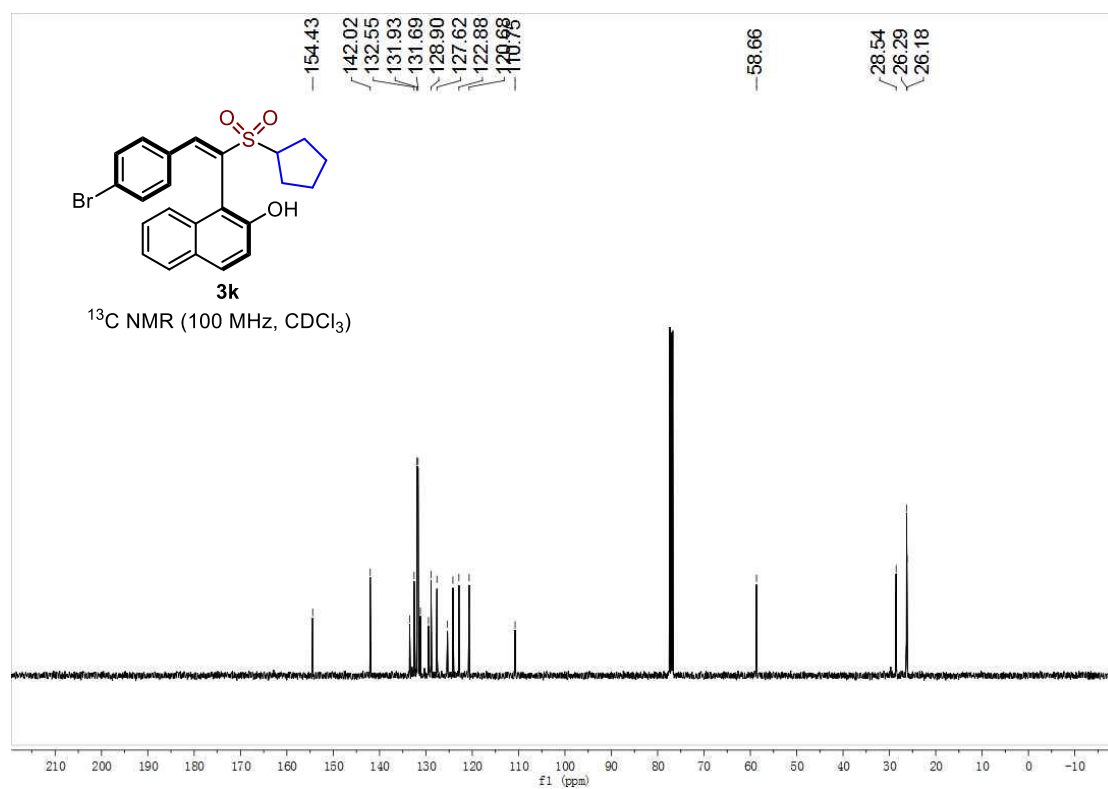

*(E)*-1-(1-(cyclopentylsulfonyl)-2-(4-(methylthio)phenyl)vinyl)naphthalen-2-ol (**3l**)



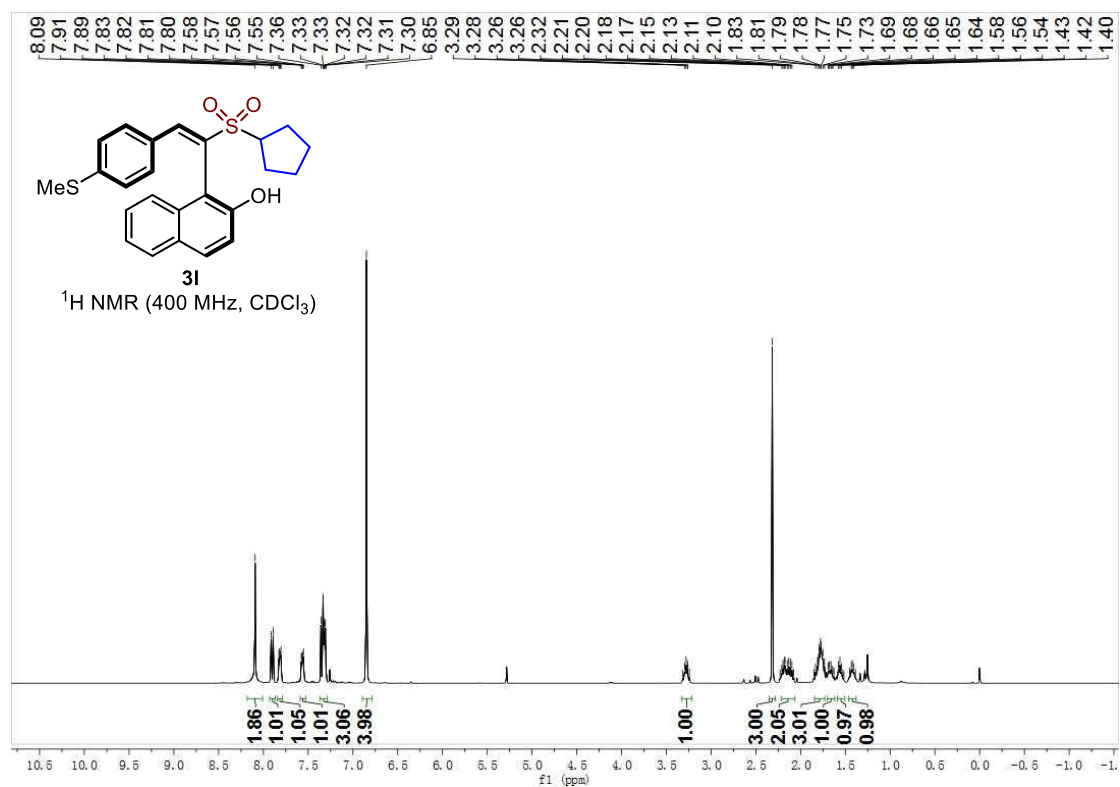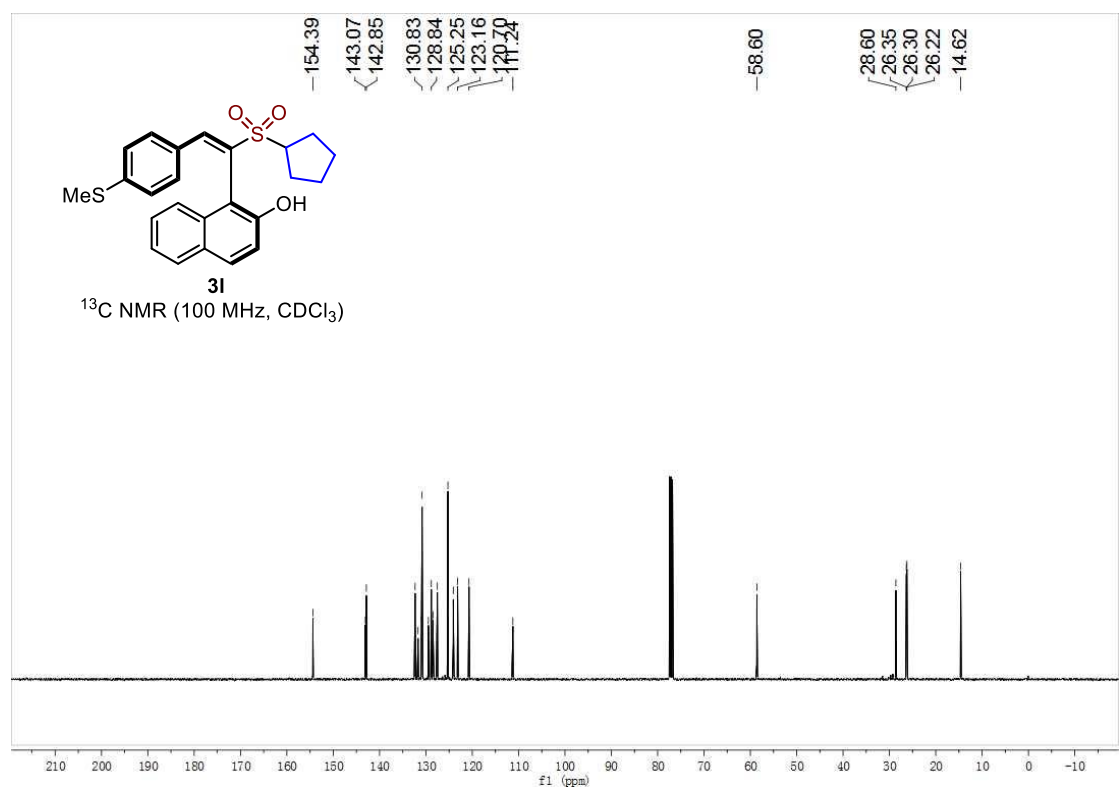

*(E)*-1-(1-(cyclopentylsulfonyl)-2-(4-(trifluoromethyl)phenyl)vinyl)naphthalen-2-ol  
(**3m**)

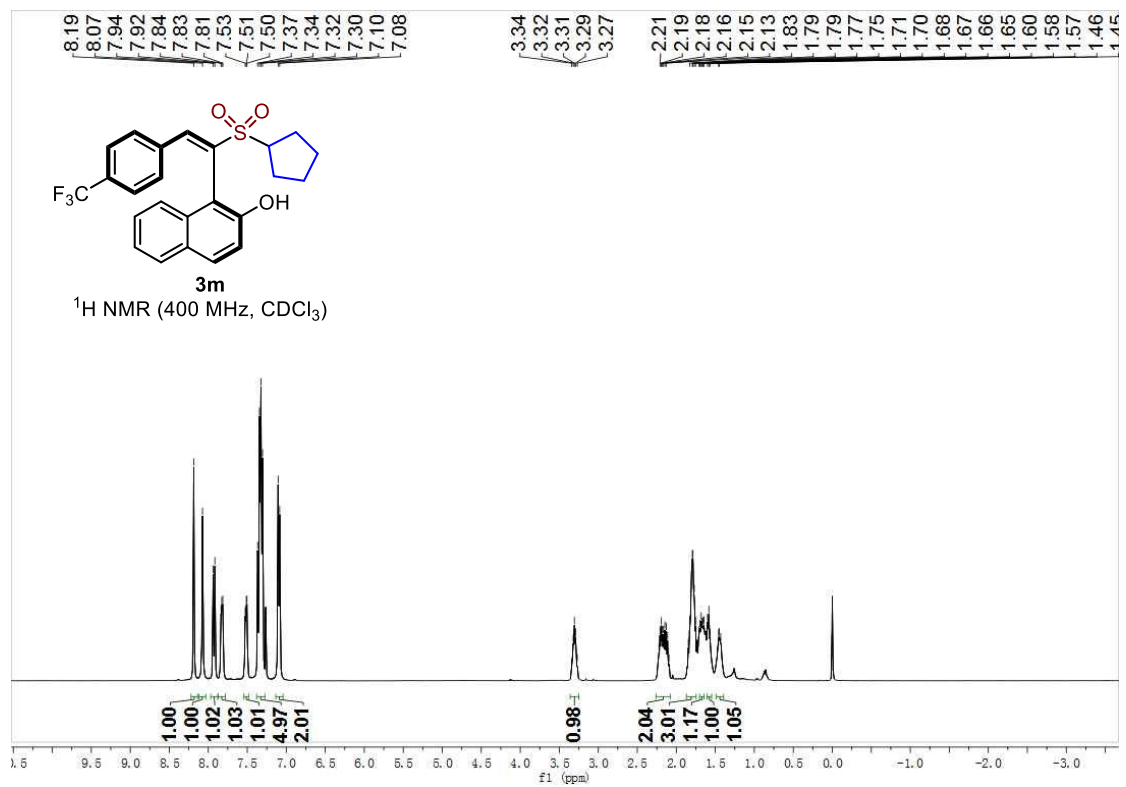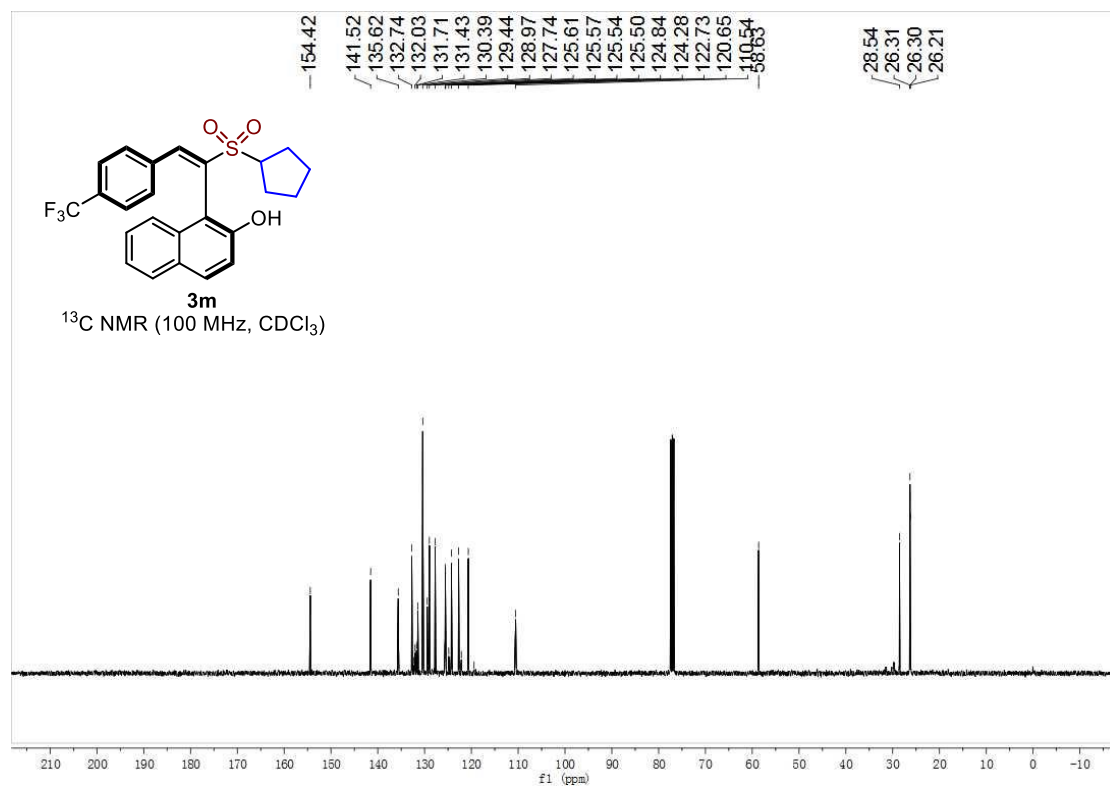

*(E)*-1-(1-(cyclopentylsulfonyl)-2-(*m*-tolyl)vinyl)naphthalen-2-ol (**3n**)

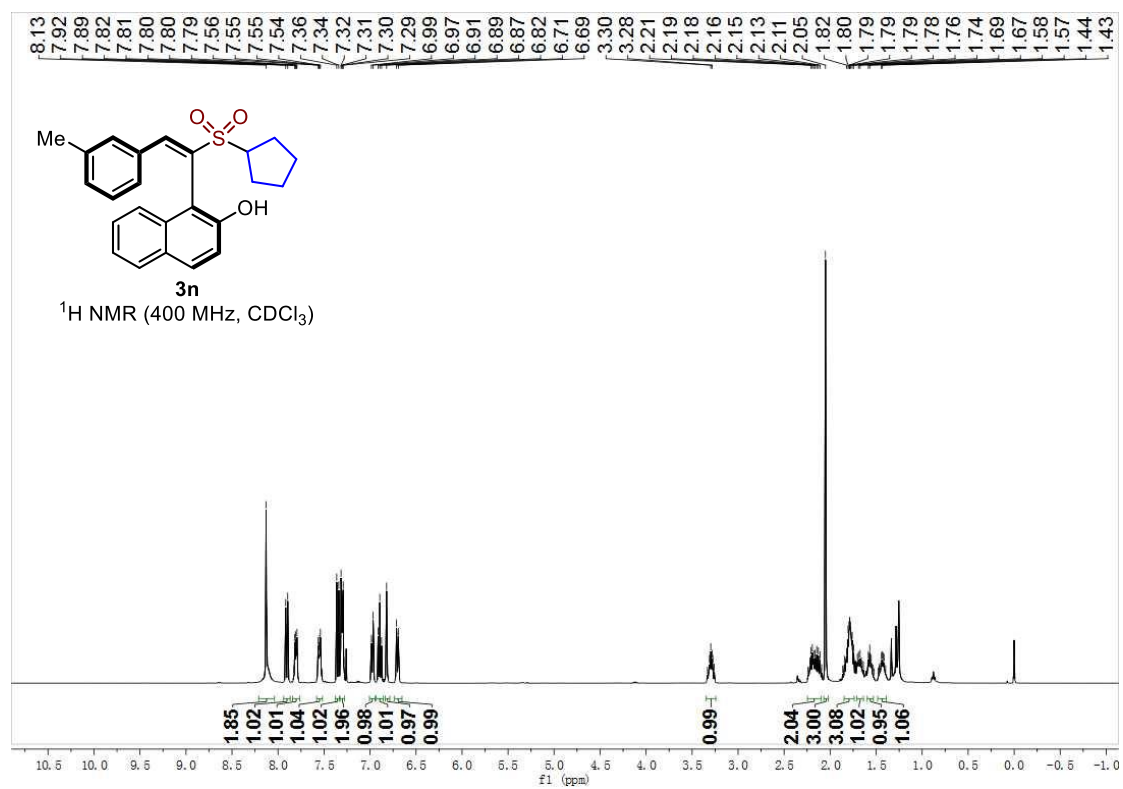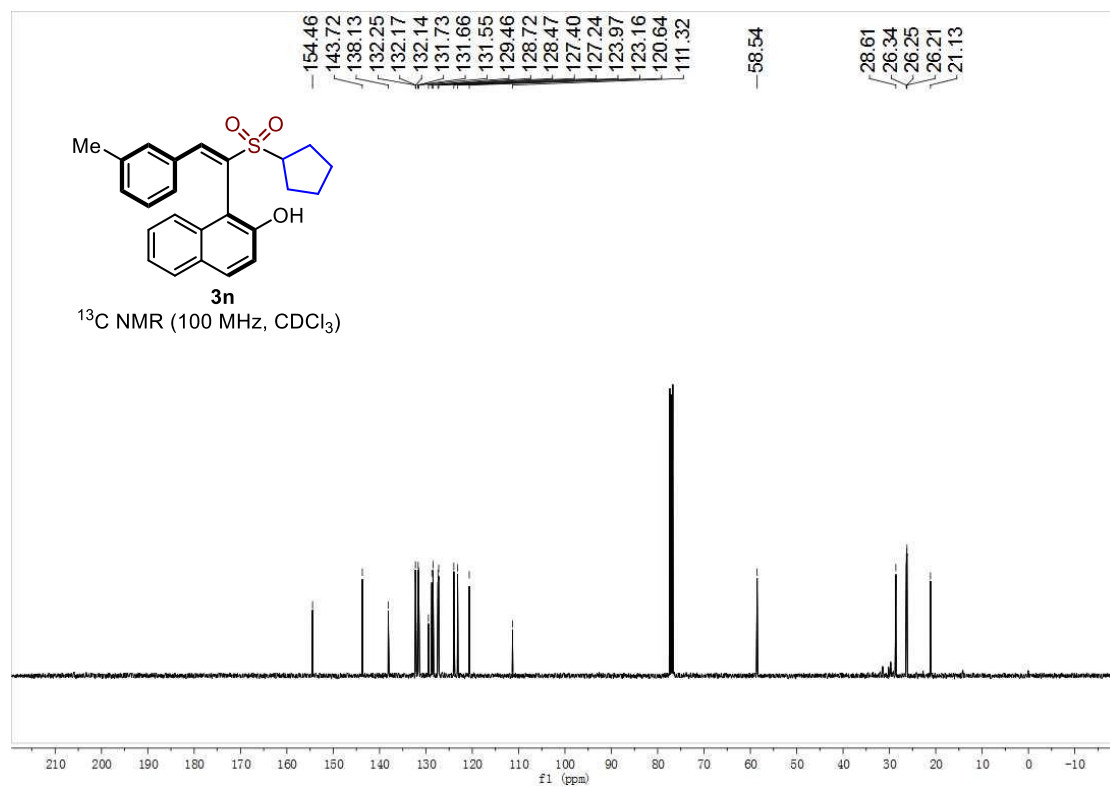

*(E)*-1-(1-(cyclopentylsulfonyl)-2-(*o*-tolyl)vinyl)naphthalen-2-ol (**3o**)

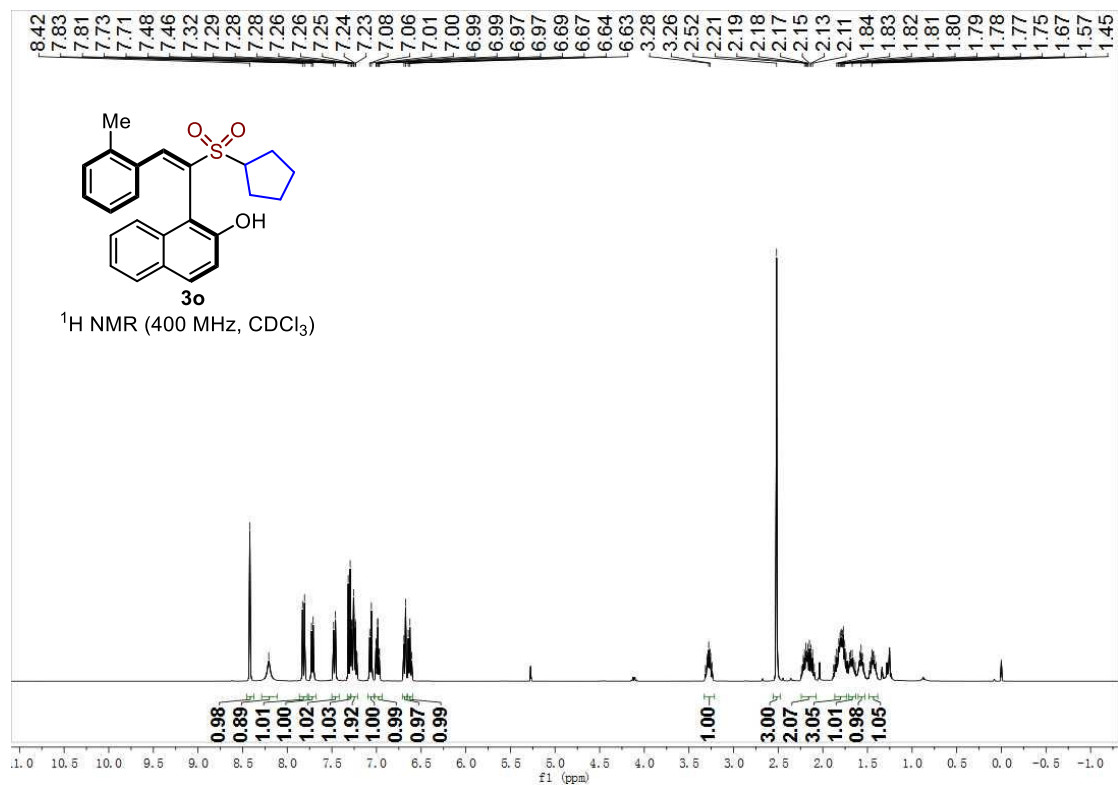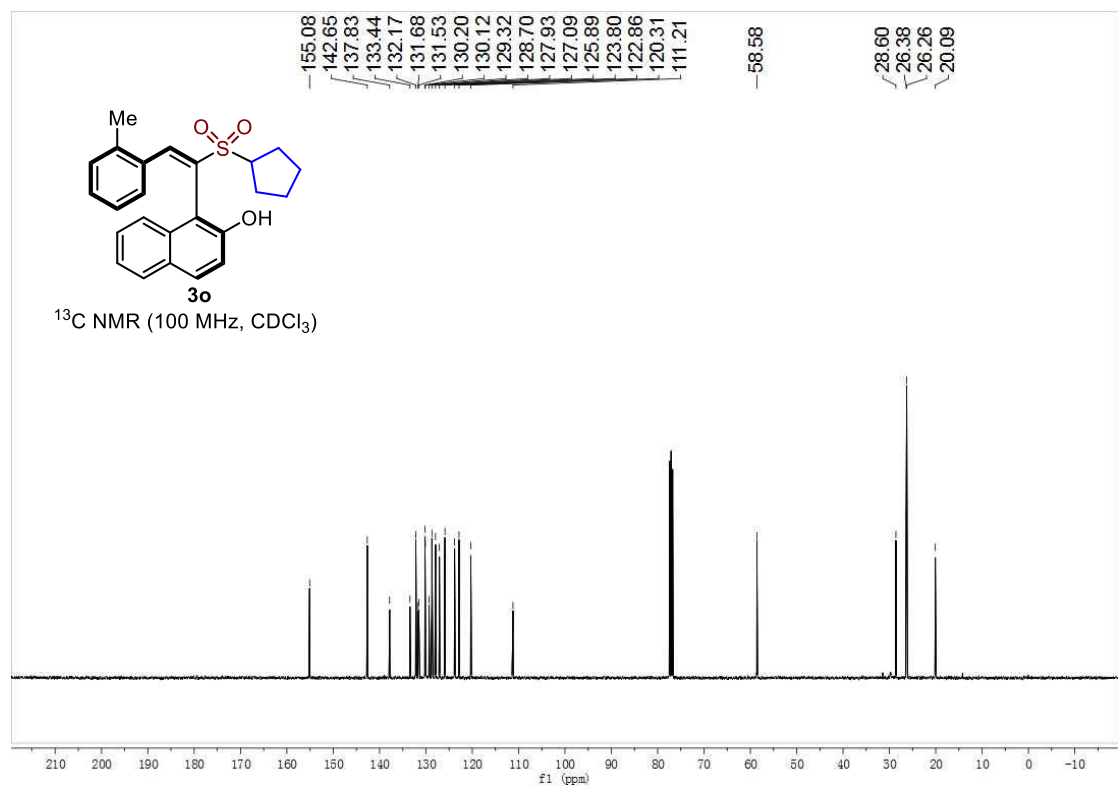

*(E)*-1-(2-(3-bromophenyl)-1-(cyclopentylsulfonyl)vinyl)naphthalen-2-ol (**3p**)

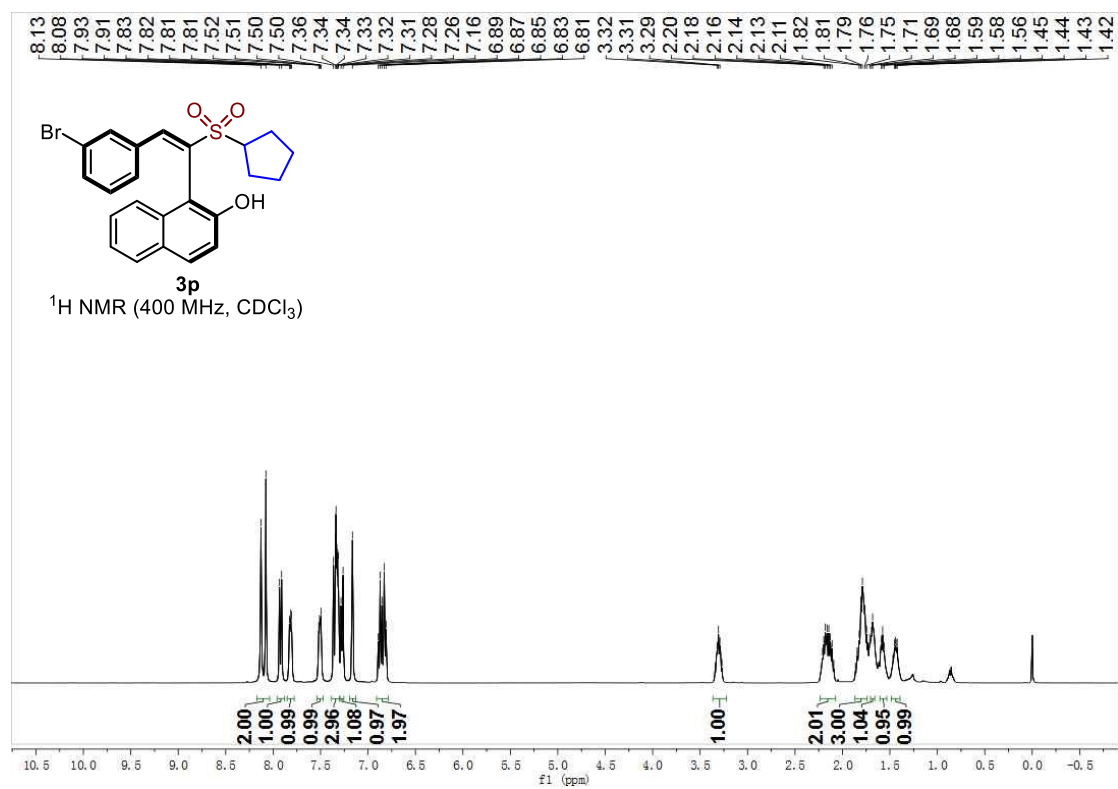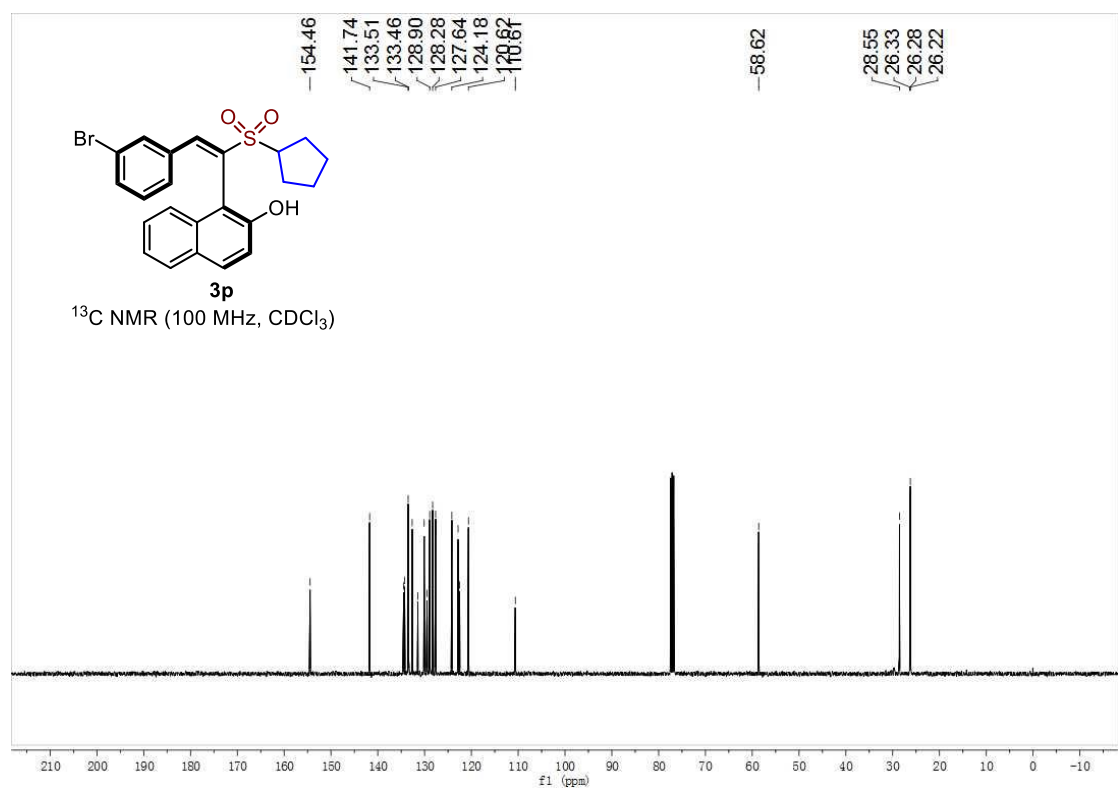

*(E)*-1-(2-(2-chlorophenyl)-1-(cyclopentylsulfonyl)vinyl)naphthalen-2-ol (**3q**)

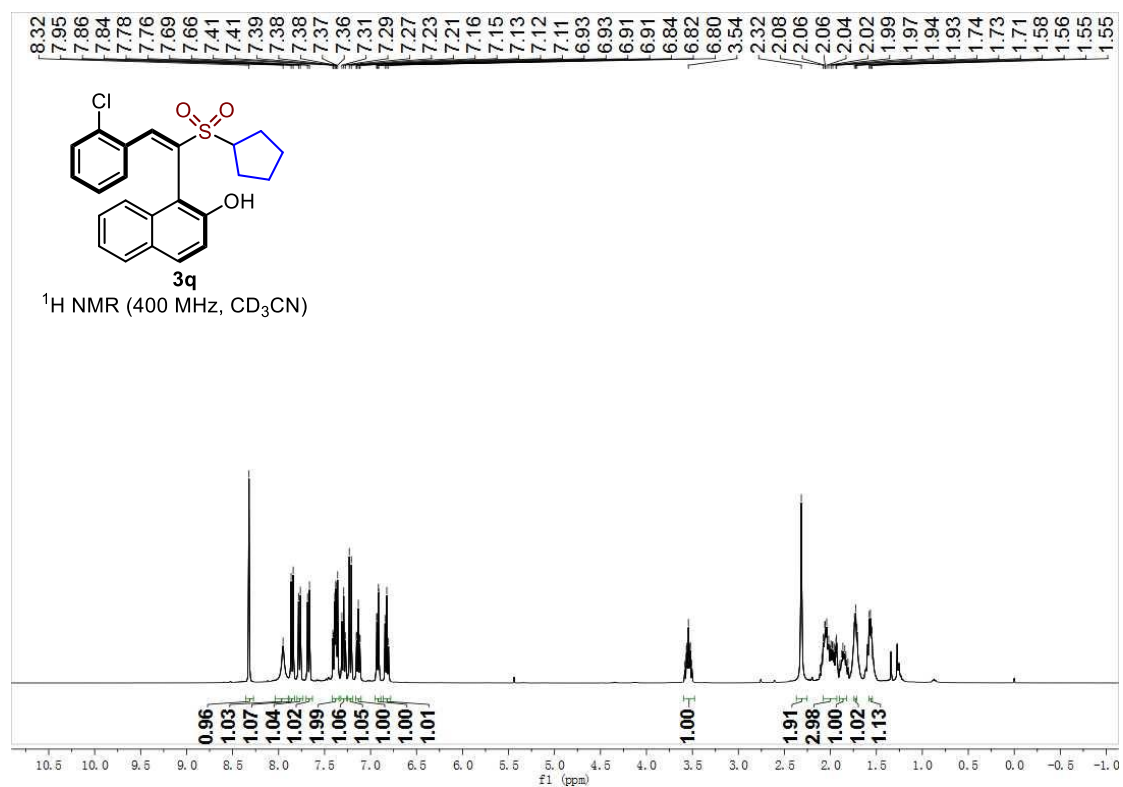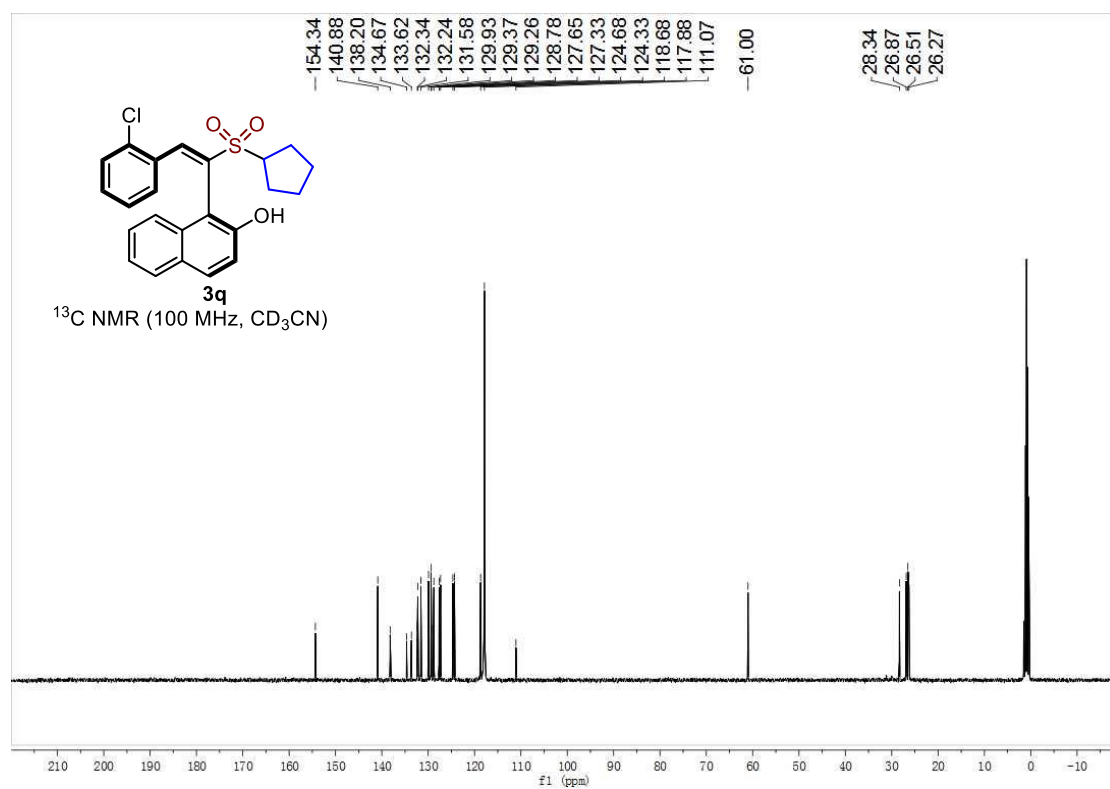

**(E)-1-(1-(cyclopentylsulfonyl)-2-(2-(trifluoromethoxy)phenyl)vinyl)naphthalen-2-ol (3r)**

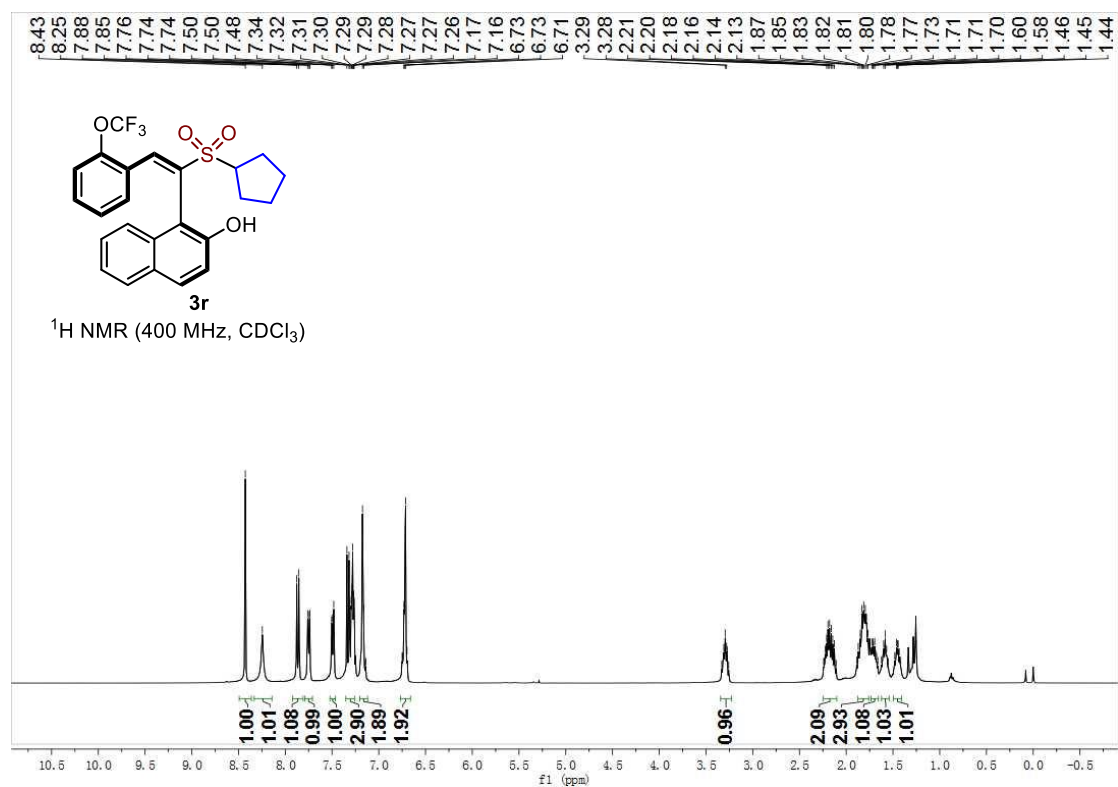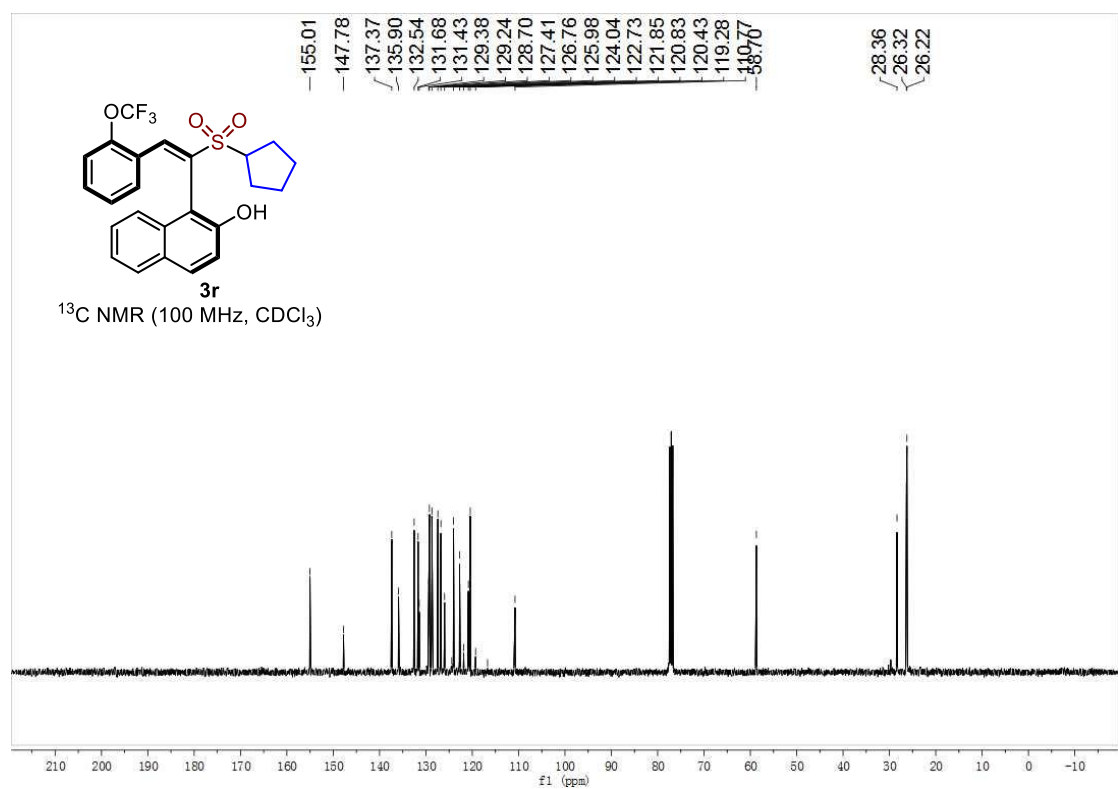

*(E)*-1-(1-(cyclopentylsulfonyl)-2-(thiophen-3-yl)vinyl)naphthalen-2-ol (**3s**)

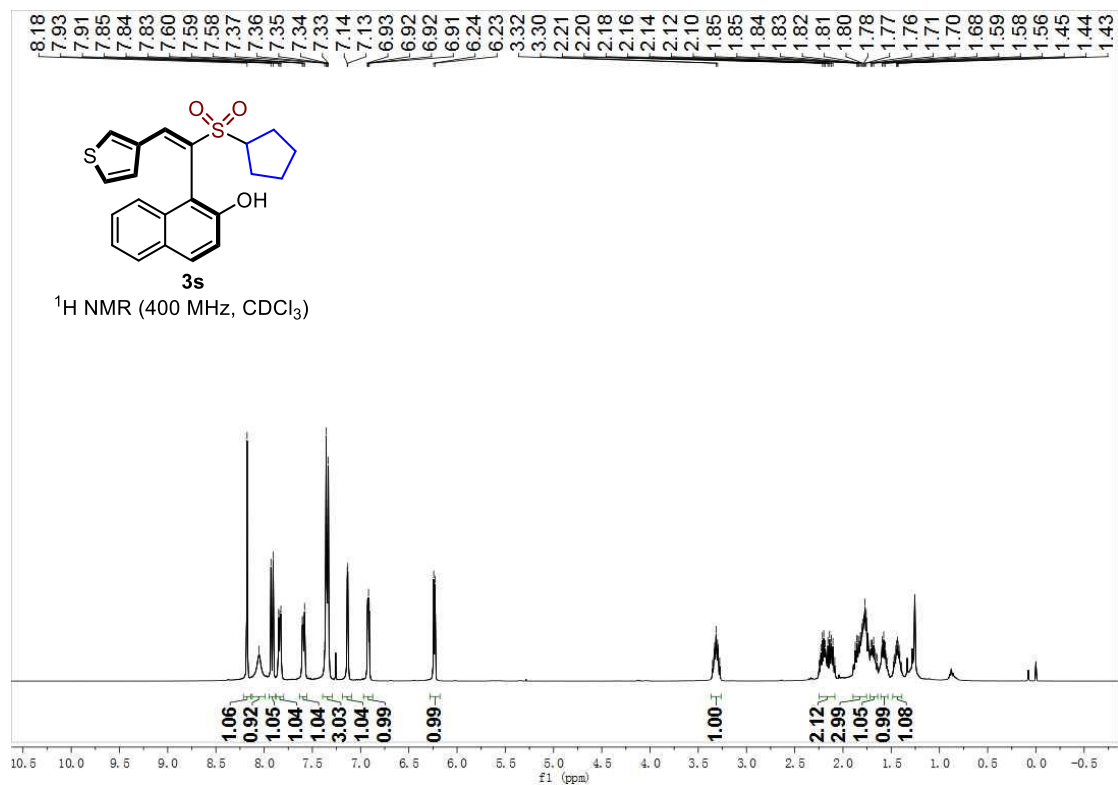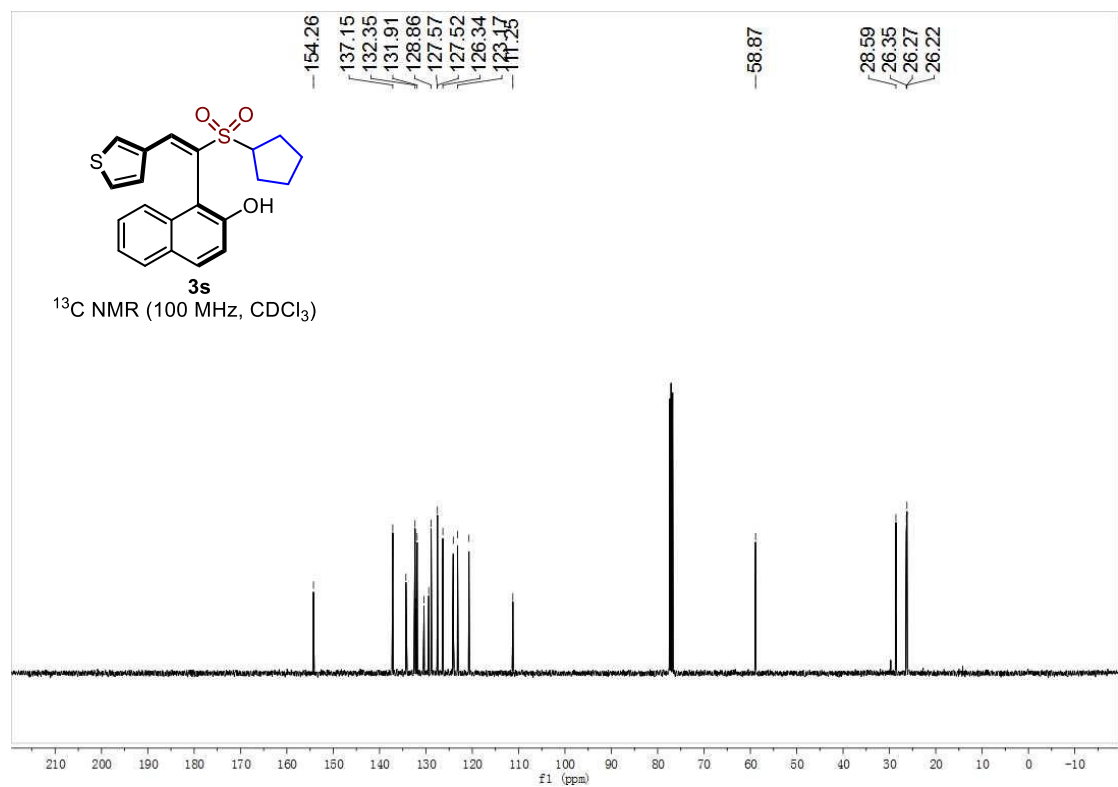

***(E)*-1-(1-(cyclopentylsulfonyl)-3,3-dimethylbut-1-en-1-yl)-7-methoxynaphthalen-2-ol (3t)**



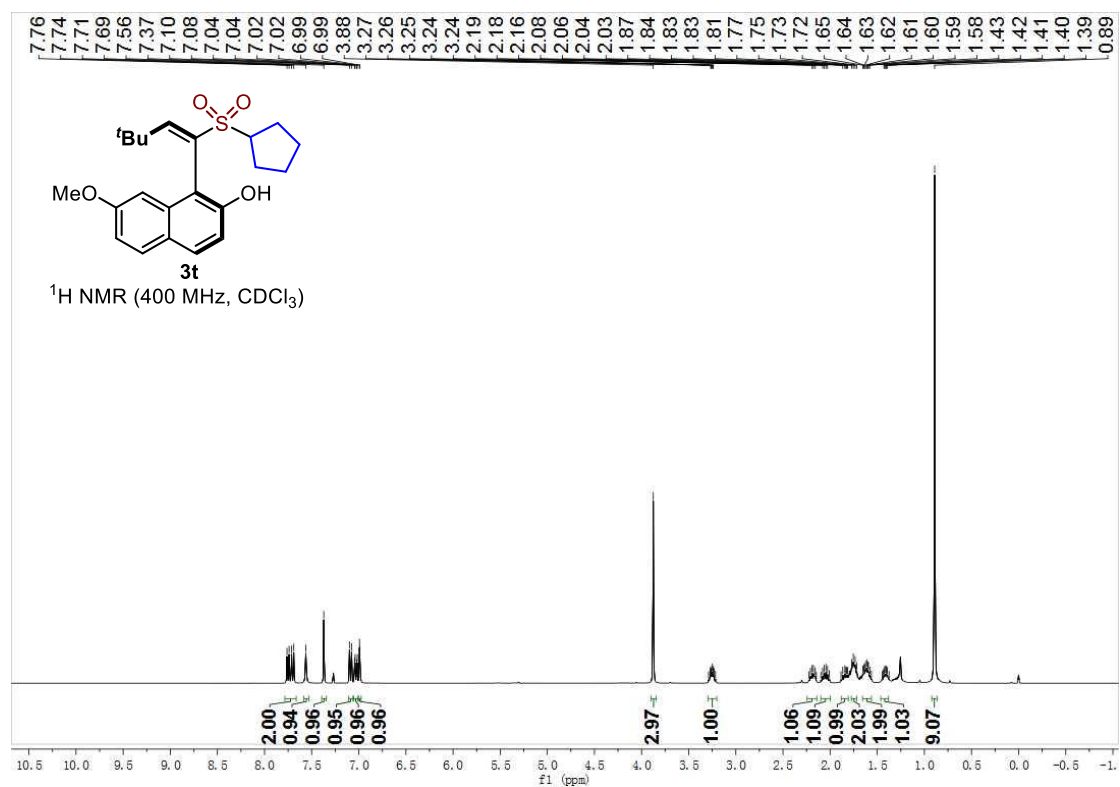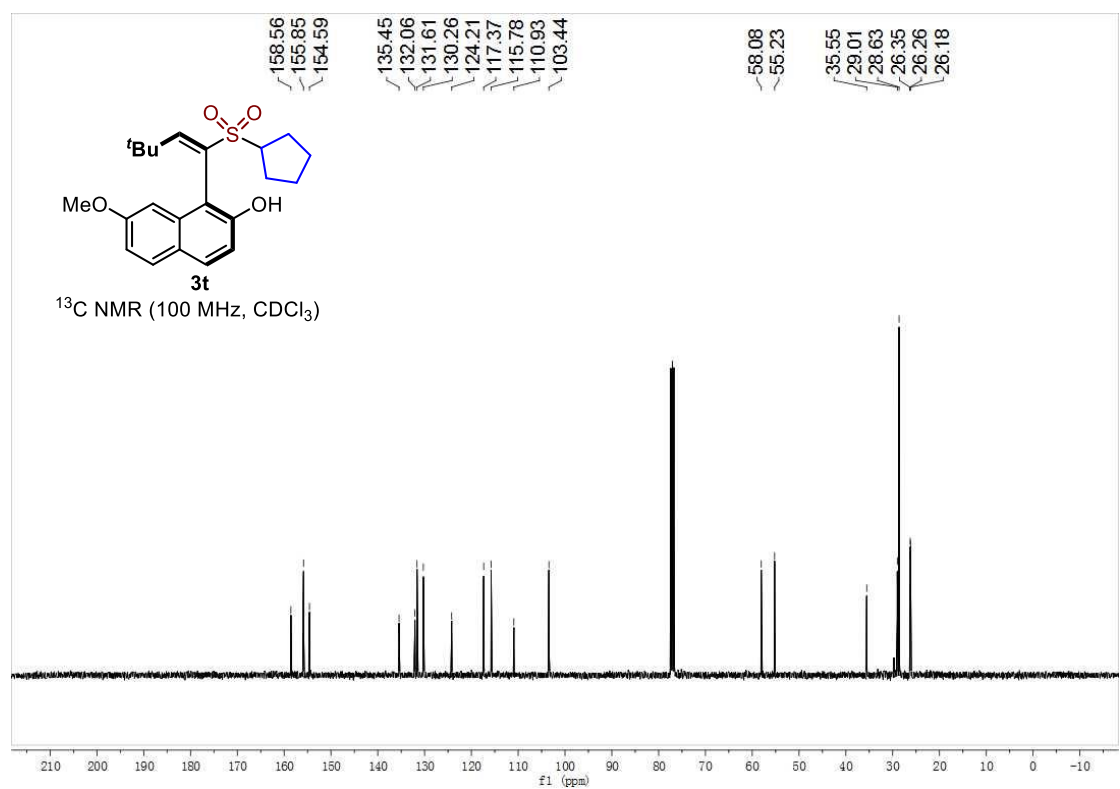

*(E)*-1-(1-(cyclopentylsulfonyl)-2-(dibenzo[*b,d*]thiophen-4-yl)vinyl)naphthalen-2-ol  
(**3u**)

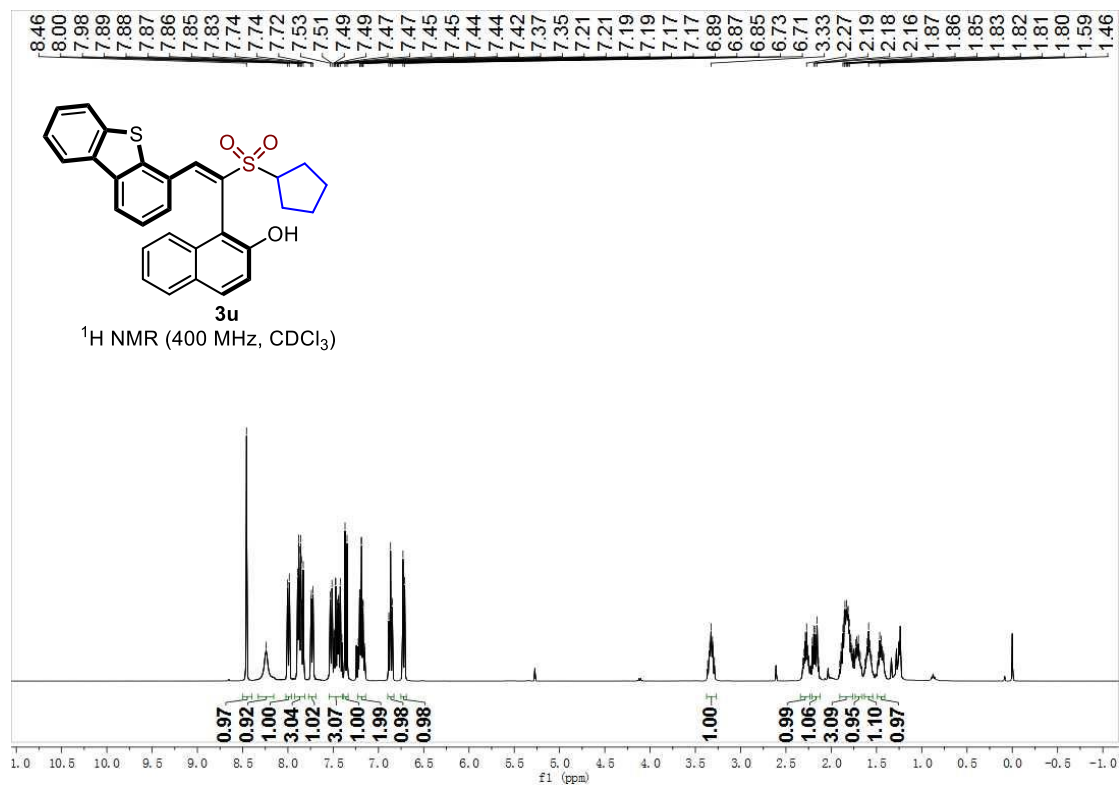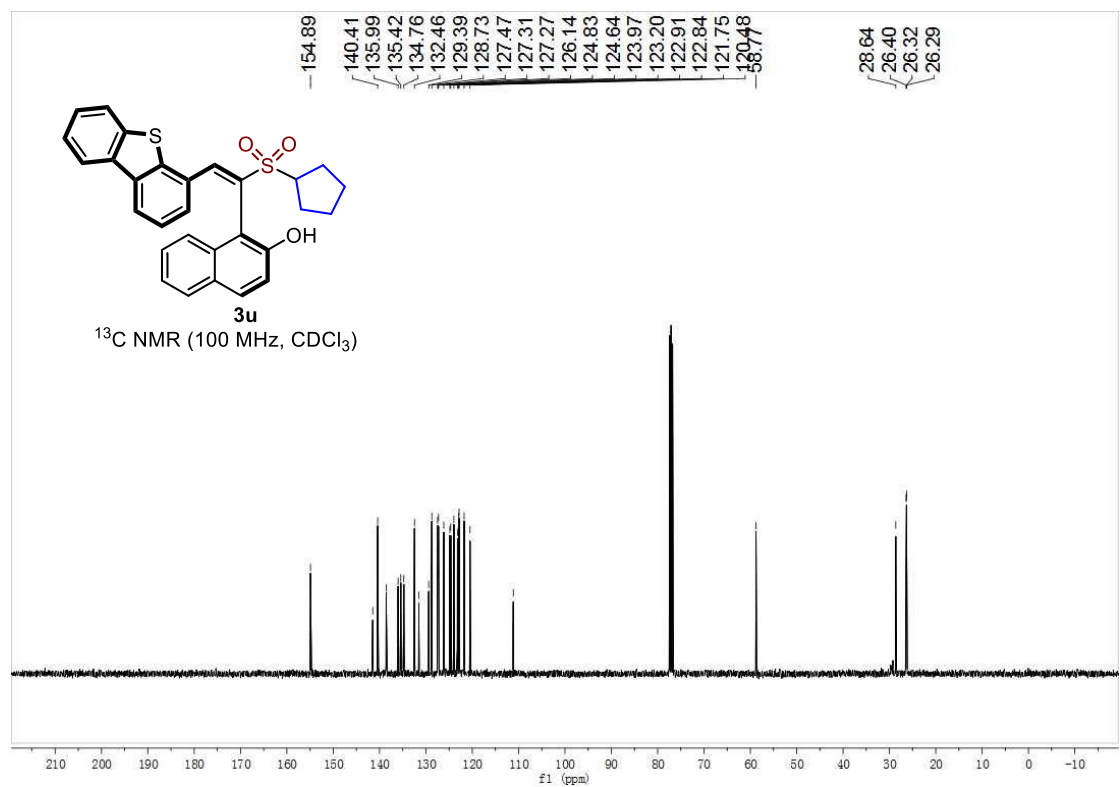

*(E)*-1-(1-(cyclopentylsulfonyl)-2-(1-methyl-1H-indazol-5-yl)vinyl)naphthalen-2-ol  
(**3v**)

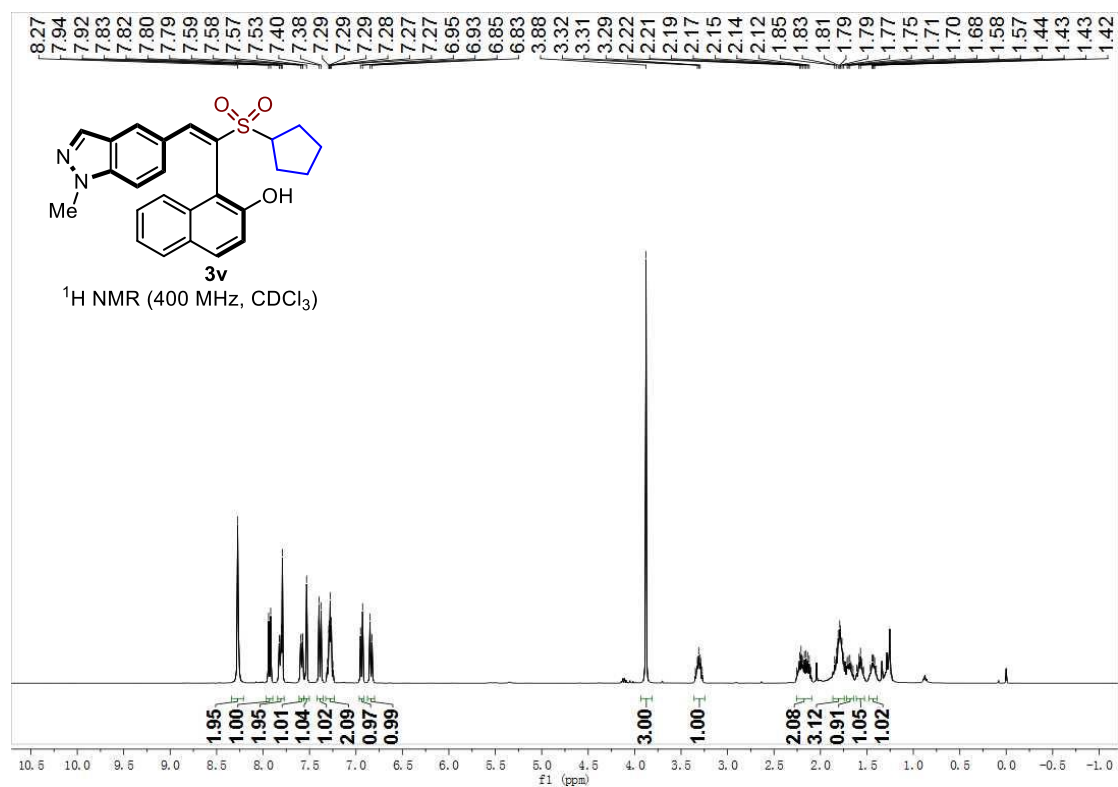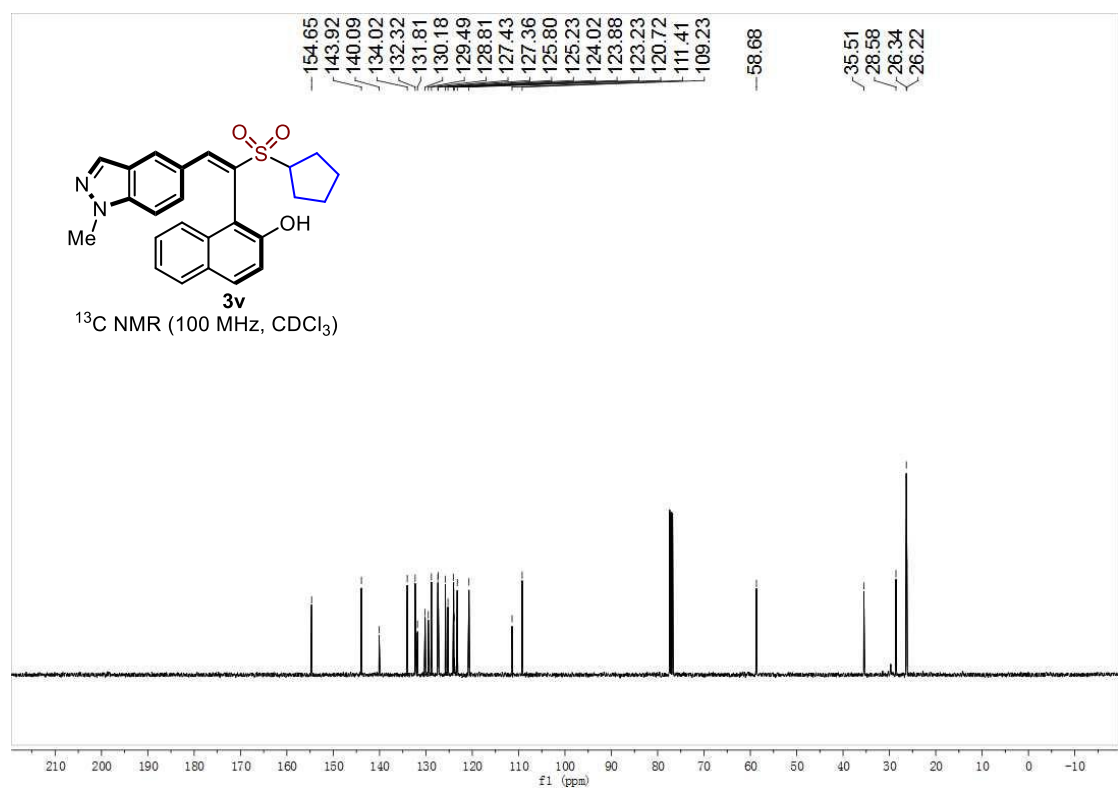

*(E)*-1-(1-(cyclopentylsulfonyl)-2-(quinolin-6-yl)vinyl)naphthalen-2-ol (**3w**)

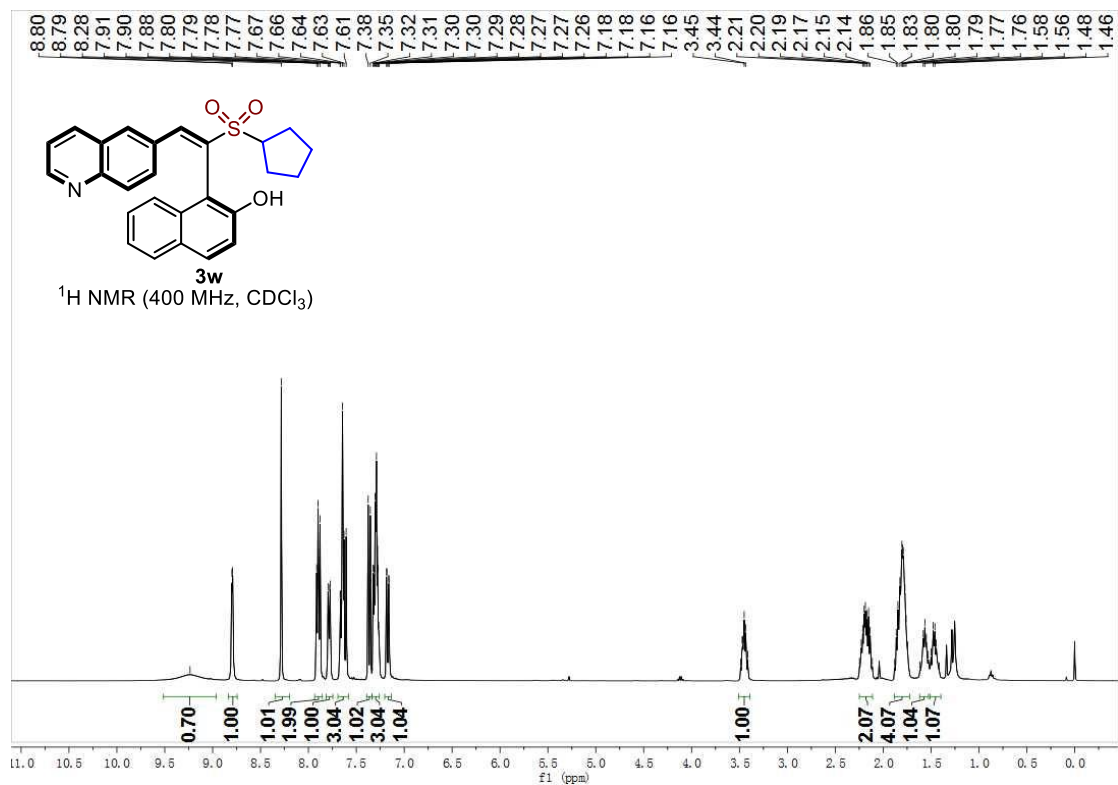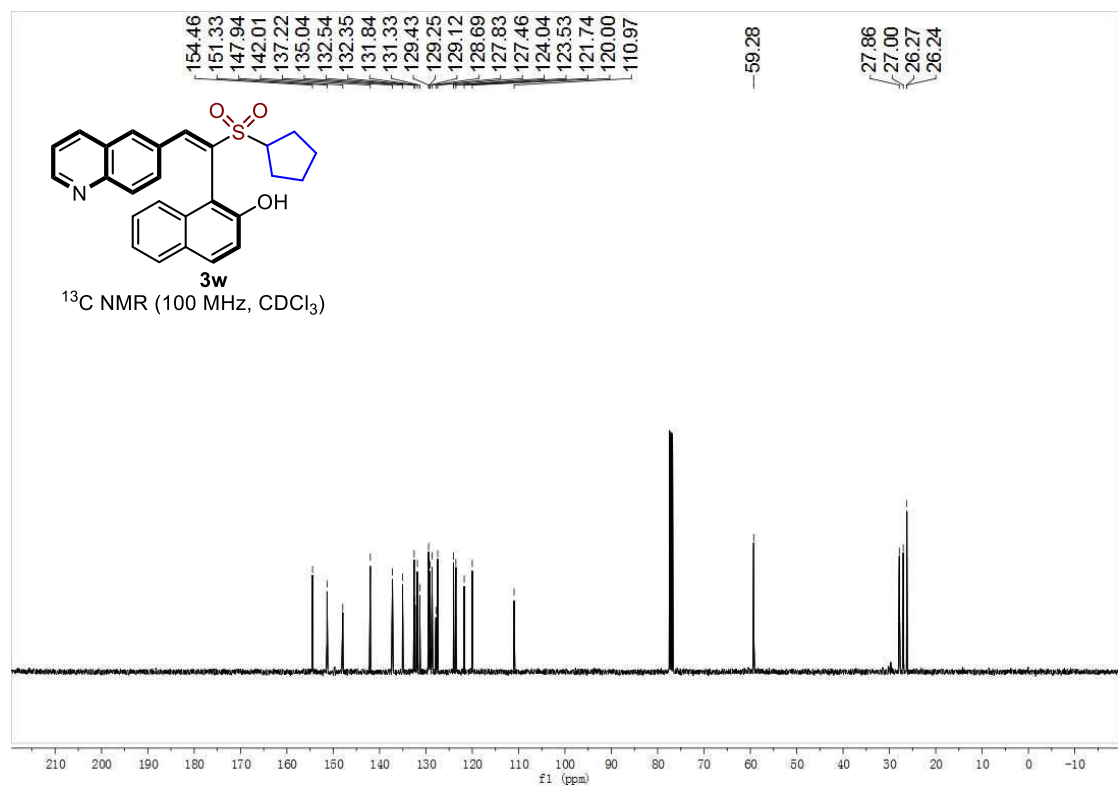

***(E)*-1-(2-(4-chloro-3-(4-ethoxybenzyl)phenyl)-1-(cyclopentylsulfonyl)vinyl)naphthalen-2-ol (3x)**

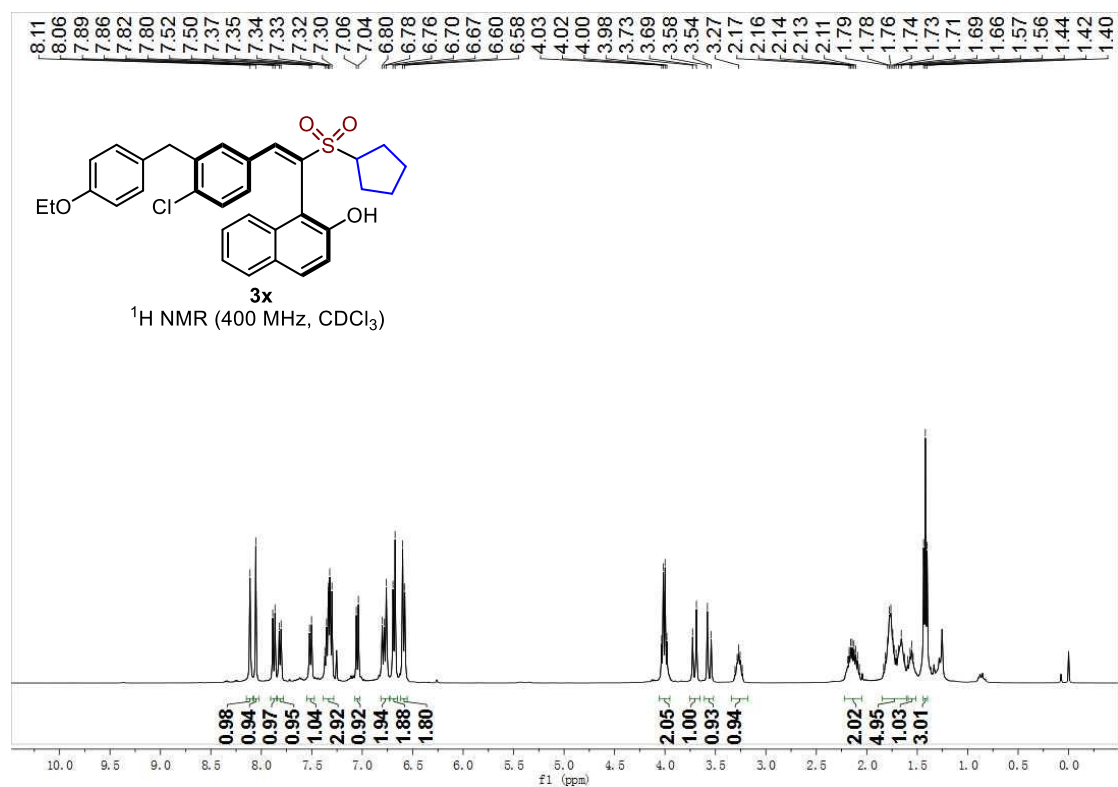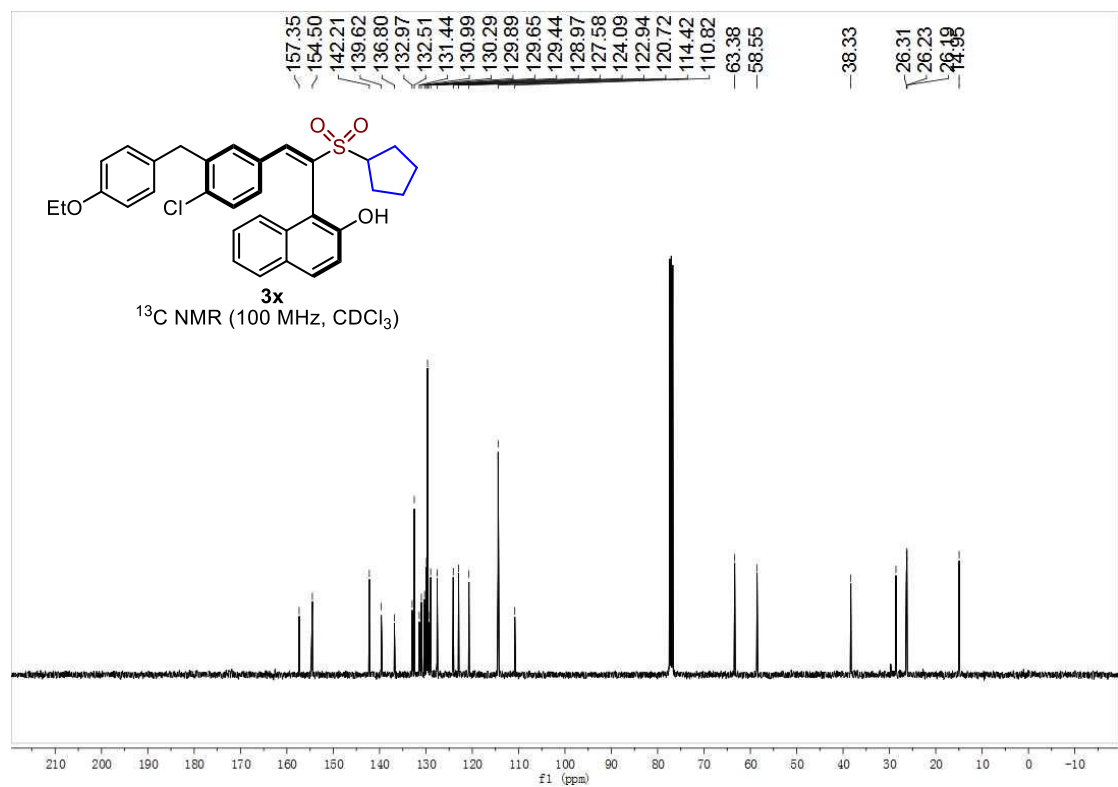

**(E)-1-(1-(cyclopentylsulfonyl)-2-phenylvinyl)-7-methoxynaphthalen-2-ol (3y)**

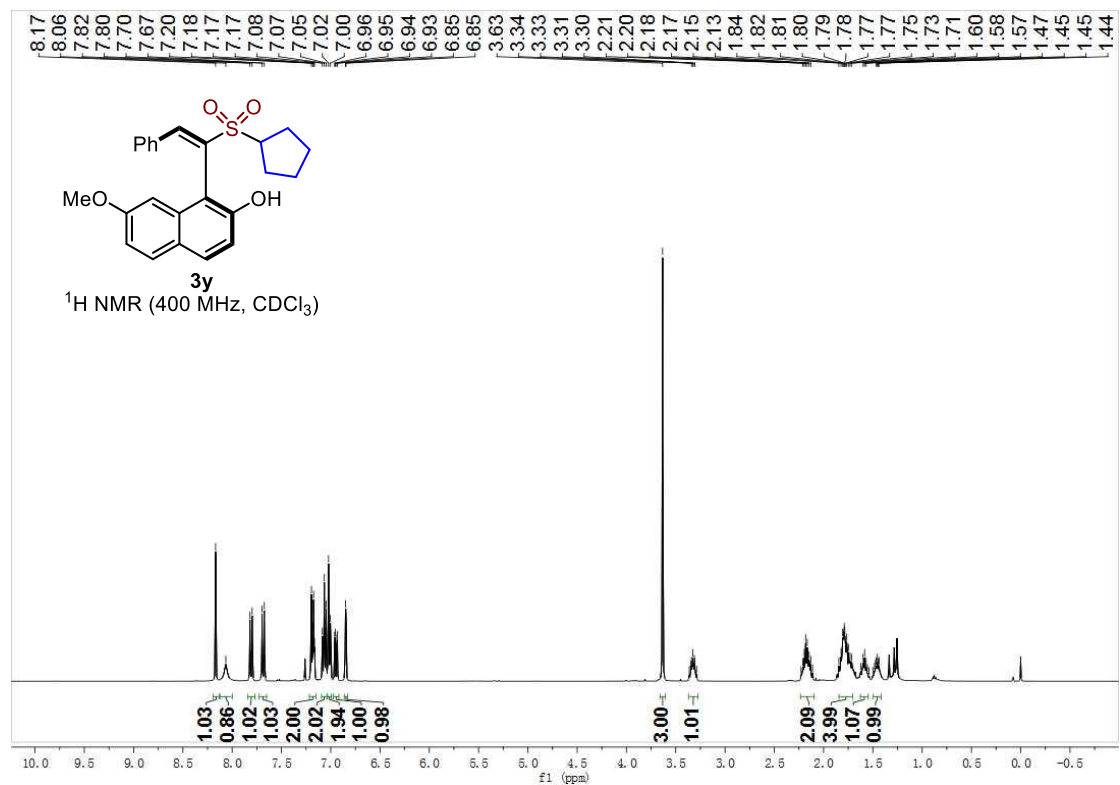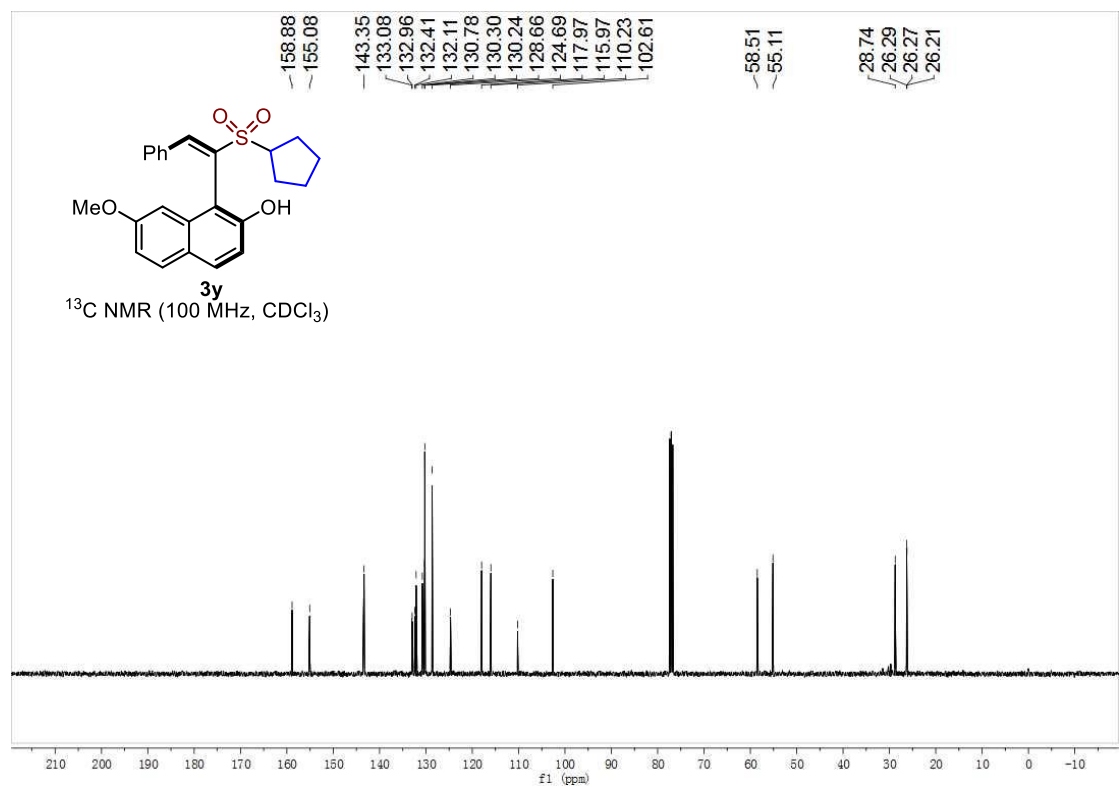

*Dimethyl (E)-2-(3-(cyclopentylsulfonyl)-3-(2-hydroxynaphthalen-1-yl)allyl)malonate (3z)*

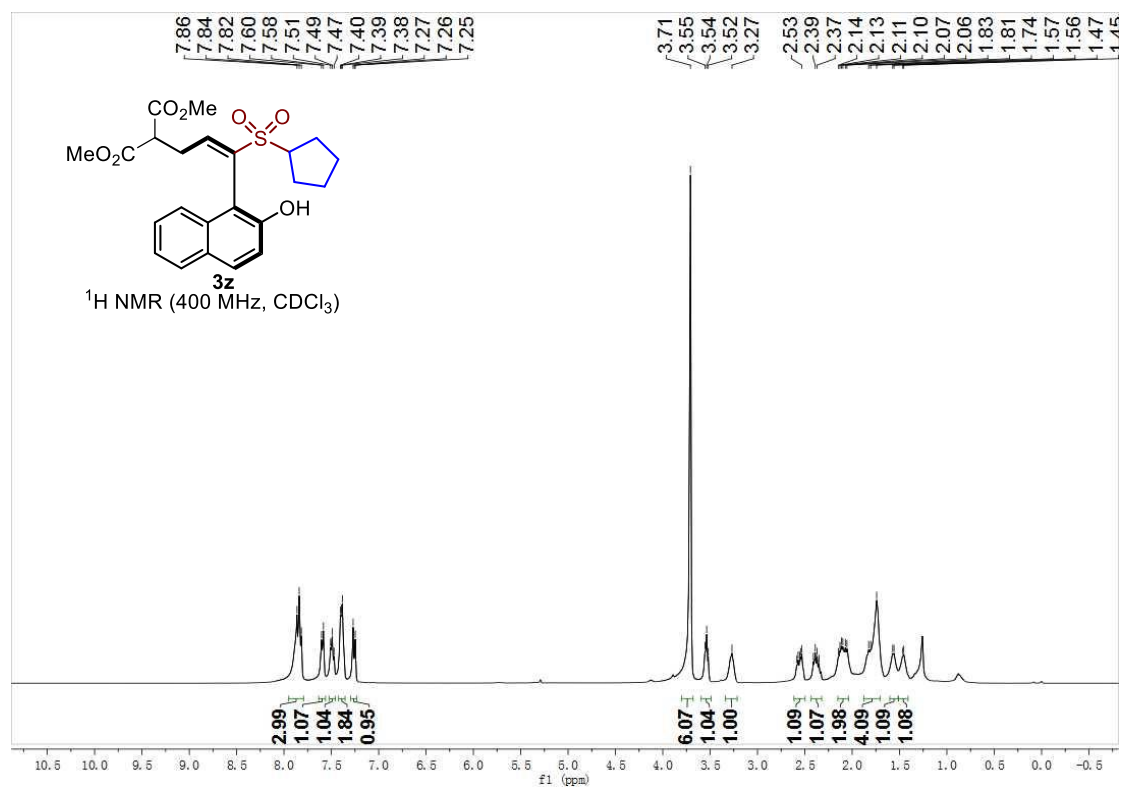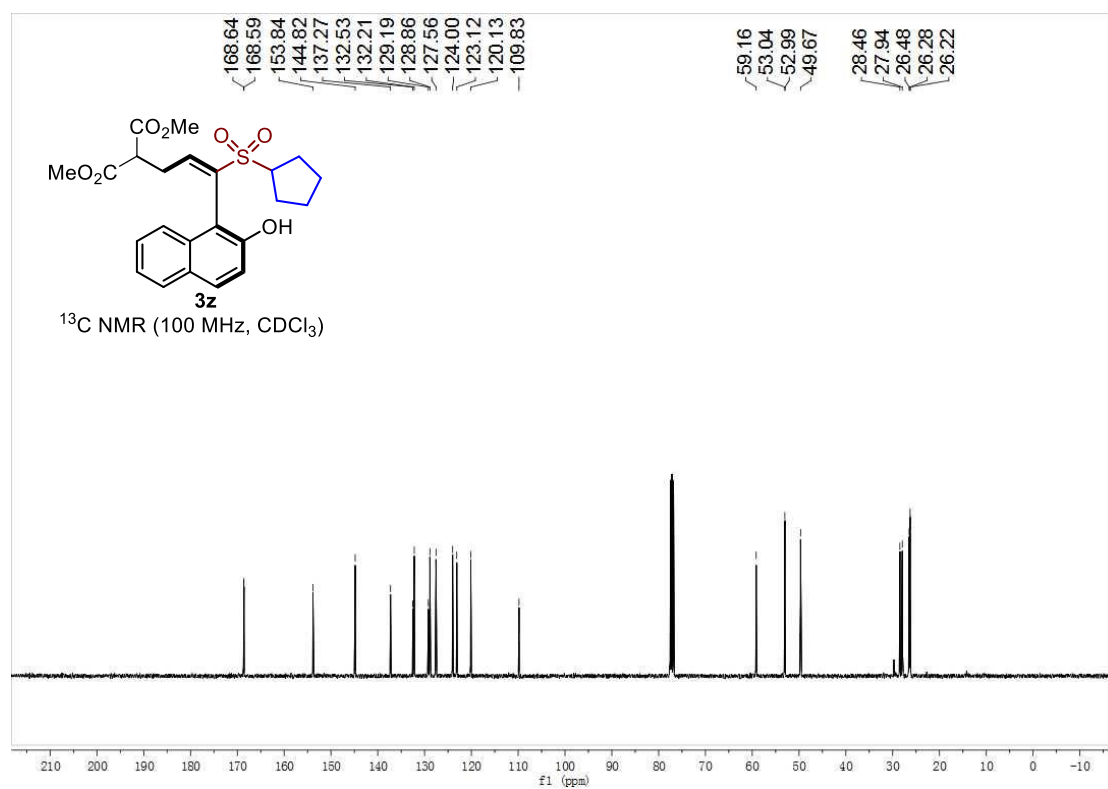

Supplement: d2qo01654k1.pdf [file d2qo01654k1.pdf]
